# Supplementary material for: Optical properties in the UV and visible spectral region of organic acids relevant to tropospheric aerosols
Source: Copernicus journal article supplement (doi:10.5194/acp-4-1759-2004), 2004-09-03
Supplement: Supplementary file 1 [file acp-4-1759-sp.xls]

## Sheet: n(lamda)
Refractive index n(l) for selcted organic acids
Wavelength /nm	5 wt% Oxalic acid	10 wt% Oxalic acid	10 wt% Malonic acid	25 wt% Malonic acid	60 wt% Malonic acid	8 wt% Succinic acid	5 wt% Glutaric acid	25 wt% Glutaric acid	50 wt% Glutaric acid	5 wt% pyruvic acid
1250	1.3322	1.337	1.3371	1.3533	1.3985	1.3361	1.3322	1.3555	1.3883	1.3325
1249	1.3322	1.33711	1.3371	1.35341	1.3985	1.3361	1.3322	1.3555	1.3883	1.3325
1248	1.3322	1.3371	1.3371	1.3534	1.3985	1.3361	1.3322	1.3555	1.3883	1.3325
1247	1.3322	1.3371	1.3371	1.3534	1.3985	1.3361	1.3322	1.3555	1.3883	1.3325
1246	1.3322	1.3371	1.3371	1.3534	1.39851	1.3361	1.3322	1.3555	1.3883	1.3325
1245	1.3322	1.3371	1.3371	1.3534	1.39861	1.3361	1.3322	1.3555	1.3883	1.3325
1244	1.33219	1.3371	1.33709	1.3534	1.3986	1.33609	1.33219	1.35549	1.38829	1.33249
1243	1.3323	1.3371	1.3372	1.3534	1.3986	1.3362	1.3323	1.3556	1.3884	1.3326
1242	1.3323	1.33721	1.3372	1.35343	1.3986	1.3362	1.3323	1.3556	1.3884	1.3326
1241	1.3323	1.3372	1.3372	1.3535	1.3986	1.3362	1.3323	1.3556	1.3884	1.3326
1240	1.3323	1.3372	1.3372	1.3535	1.3986	1.3362	1.3323	1.3556	1.3884	1.3326
1239	1.3323	1.3372	1.3372	1.3535	1.3986	1.3362	1.3323	1.3556	1.3884	1.3326
1238	1.3323	1.3372	1.3372	1.3535	1.39859	1.3362	1.3323	1.3556	1.3884	1.3326
1237	1.33229	1.3372	1.33719	1.3535	1.39869	1.3362	1.33229	1.35559	1.38839	1.3326
1236	1.3324	1.3372	1.3373	1.3535	1.3987	1.33621	1.3324	1.3557	1.3885	1.33261
1235	1.3324	1.33724	1.3373	1.35349	1.3987	1.33631	1.3324	1.3557	1.3885	1.33271
1234	1.3324	1.3373	1.3373	1.35358	1.3987	1.3363	1.3324	1.3557	1.3885	1.3327
1233	1.3324	1.3373	1.3373	1.3536	1.3987	1.3363	1.3324	1.3557	1.3885	1.3327
1232	1.3324	1.3373	1.3373	1.3536	1.3987	1.3363	1.3324	1.3557	1.3885	1.3327
1231	1.3324	1.3373	1.3373	1.3536	1.3987	1.3363	1.3324	1.3557	1.3885	1.3327
1230	1.3324	1.3373	1.3373	1.3536	1.3987	1.3363	1.3324	1.3557	1.3885	1.3327
1229	1.33243	1.3373	1.33733	1.3536	1.3987	1.33633	1.33243	1.35573	1.38853	1.33273
1228	1.3325	1.33737	1.3374	1.3536	1.39877	1.3364	1.3325	1.3558	1.3886	1.3328
1227	1.3325	1.3374	1.3374	1.3536	1.3988	1.3364	1.3325	1.3558	1.3886	1.3328
1226	1.3325	1.3374	1.3374	1.35371	1.3988	1.3364	1.3325	1.3558	1.3886	1.3328
1225	1.3325	1.3374	1.3374	1.3537	1.3988	1.3364	1.3325	1.3558	1.3886	1.3328
1224	1.3325	1.3374	1.3374	1.3537	1.3988	1.3364	1.3325	1.3558	1.3886	1.3328
1223	1.3325	1.3374	1.3374	1.3537	1.3988	1.3364	1.3325	1.3558	1.3886	1.3328
1222	1.33249	1.3374	1.33739	1.3537	1.3988	1.33639	1.33249	1.35579	1.38859	1.33279
1221	1.3326	1.3374	1.3375	1.3537	1.3988	1.3365	1.3326	1.3559	1.3887	1.3329
1220	1.3326	1.33751	1.3375	1.3537	1.3988	1.3365	1.3326	1.3559	1.3887	1.3329
1219	1.3326	1.3375	1.3375	1.35377	1.39879	1.3365	1.3326	1.3559	1.3887	1.3329
1218	1.3326	1.3375	1.3375	1.3538	1.3989	1.3365	1.3326	1.3559	1.3887	1.3329
1217	1.3326	1.3375	1.3375	1.3538	1.3989	1.3365	1.3326	1.3559	1.3887	1.3329
1216	1.3326	1.3375	1.3375	1.3538	1.3989	1.3365	1.3326	1.3559	1.3887	1.3329
1215	1.3326	1.3375	1.3375	1.3538	1.3989	1.3365	1.3326	1.3559	1.3887	1.3329
1214	1.33264	1.33749	1.33754	1.3538	1.3989	1.33654	1.33264	1.35594	1.38874	1.33294
1213	1.3327	1.33759	1.3376	1.3538	1.3989	1.3366	1.3327	1.356	1.3888	1.333
1212	1.3327	1.3376	1.3376	1.3538	1.3989	1.3366	1.3327	1.356	1.3888	1.333
1211	1.3327	1.3376	1.3376	1.35385	1.3989	1.3366	1.3327	1.356	1.3888	1.333
1210	1.3327	1.3376	1.3376	1.3539	1.39889	1.3366	1.3327	1.356	1.3888	1.333
1209	1.3327	1.3376	1.3376	1.3539	1.39901	1.3366	1.3327	1.356	1.3888	1.333
1208	1.3327	1.3376	1.3376	1.3539	1.399	1.3366	1.3327	1.356	1.3888	1.333
1207	1.3327	1.3376	1.3376	1.3539	1.399	1.3366	1.3327	1.356	1.3888	1.333
1206	1.33281	1.3376	1.33771	1.3539	1.399	1.33663	1.33281	1.35611	1.38891	1.33311
1205	1.3328	1.33768	1.3377	1.3539	1.399	1.3367	1.3328	1.3561	1.3889	1.3331
1204	1.3328	1.3377	1.3377	1.3539	1.399	1.3367	1.3328	1.3561	1.3889	1.3331
1203	1.3328	1.3377	1.3377	1.35395	1.399	1.3367	1.3328	1.3561	1.3889	1.3331
1202	1.3328	1.3377	1.3377	1.354	1.399	1.3367	1.3328	1.3561	1.3889	1.3331
1201	1.3328	1.3377	1.3377	1.354	1.399	1.3367	1.3328	1.3561	1.3889	1.3331
1200	1.3328	1.3377	1.3377	1.354	1.39899	1.3367	1.3328	1.3561	1.3889	1.3331
1199	1.3328	1.3377	1.3377	1.354	1.3991	1.3367	1.3328	1.3561	1.3889	1.3331
1198	1.33291	1.33774	1.33781	1.354	1.3991	1.33681	1.33291	1.35621	1.38901	1.33321
1197	1.3329	1.3378	1.3378	1.354	1.3991	1.3368	1.3329	1.3562	1.389	1.3332
1196	1.3329	1.3378	1.3378	1.354	1.3991	1.3368	1.3329	1.3562	1.389	1.3332
1195	1.3329	1.3378	1.3378	1.35407	1.3991	1.3368	1.3329	1.3562	1.389	1.3332
1194	1.3329	1.3378	1.3378	1.3541	1.3991	1.3368	1.3329	1.3562	1.389	1.3332
1193	1.3329	1.3378	1.3378	1.3541	1.3991	1.3368	1.3329	1.3562	1.389	1.3332
1192	1.3329	1.3378	1.3378	1.3541	1.3991	1.3368	1.3329	1.3562	1.389	1.3332
1191	1.33292	1.3378	1.33782	1.3541	1.3991	1.33682	1.33292	1.35622	1.38902	1.33322
1190	1.333	1.33787	1.3379	1.3541	1.39917	1.3369	1.333	1.3563	1.3891	1.3333
1189	1.333	1.3379	1.3379	1.3541	1.3992	1.3369	1.333	1.3563	1.3891	1.3333
1188	1.333	1.3379	1.3379	1.3541	1.3992	1.3369	1.333	1.3563	1.3891	1.3333
1187	1.333	1.3379	1.3379	1.3541	1.3992	1.3369	1.333	1.3563	1.3891	1.3333
1186	1.333	1.3379	1.3379	1.35421	1.3992	1.3369	1.333	1.3563	1.3891	1.3333
1185	1.333	1.3379	1.3379	1.3542	1.3992	1.3369	1.333	1.3563	1.3891	1.3333
1184	1.333	1.3379	1.3379	1.3542	1.3992	1.3369	1.333	1.3563	1.3891	1.3333
1183	1.33306	1.33789	1.33796	1.3542	1.3992	1.33696	1.33306	1.35636	1.38916	1.33336
1182	1.3331	1.338	1.338	1.3542	1.3992	1.337	1.3331	1.3564	1.3892	1.3334
1181	1.3331	1.338	1.338	1.3542	1.39919	1.337	1.3331	1.3564	1.3892	1.3334
1180	1.3331	1.338	1.338	1.3542	1.39929	1.337	1.3331	1.3564	1.3892	1.3334
1179	1.3331	1.338	1.338	1.3542	1.3993	1.337	1.3331	1.3564	1.3892	1.3334
1178	1.3331	1.338	1.338	1.35428	1.3993	1.337	1.3331	1.3564	1.3892	1.3334
1177	1.3331	1.338	1.338	1.3543	1.3993	1.337	1.3331	1.3564	1.3892	1.3334
1176	1.33309	1.338	1.33799	1.3543	1.3993	1.337	1.33309	1.35639	1.38919	1.33339
1175	1.3332	1.338	1.3381	1.3543	1.3993	1.33701	1.3332	1.3565	1.3893	1.3335
1174	1.3332	1.33806	1.3381	1.3543	1.3993	1.3371	1.3332	1.3565	1.3893	1.3335
1173	1.3332	1.3381	1.3381	1.3543	1.3993	1.3371	1.3332	1.3565	1.3893	1.3335
1172	1.3332	1.3381	1.3381	1.3543	1.3993	1.3371	1.3332	1.3565	1.3893	1.3335
1171	1.3332	1.3381	1.3381	1.3543	1.3993	1.3371	1.3332	1.3565	1.3893	1.3335
1170	1.3332	1.3381	1.3381	1.35434	1.39934	1.3371	1.3332	1.3565	1.3893	1.3335
1169	1.3332	1.3381	1.3381	1.3544	1.3994	1.3371	1.3332	1.3565	1.3893	1.3335
1168	1.3332	1.3381	1.3381	1.3544	1.3994	1.3371	1.3332	1.3565	1.3893	1.3335
1167	1.33328	1.33809	1.33818	1.3544	1.3994	1.33718	1.33328	1.35658	1.38938	1.33358
1166	1.3333	1.33821	1.3382	1.3544	1.3994	1.3372	1.3333	1.3566	1.3894	1.3336
1165	1.3333	1.3382	1.3382	1.3544	1.3994	1.3372	1.3333	1.3566	1.3894	1.3336
1164	1.3333	1.3382	1.3382	1.3544	1.3994	1.3372	1.3333	1.3566	1.3894	1.3336
1163	1.3333	1.3382	1.3382	1.3544	1.3994	1.3372	1.3333	1.3566	1.3894	1.3336
1162	1.3333	1.3382	1.3382	1.3544	1.3994	1.3372	1.3333	1.3566	1.3894	1.3336
1161	1.3333	1.3382	1.3382	1.35447	1.3994	1.3372	1.3333	1.3566	1.3894	1.3336
1160	1.3333	1.3382	1.3382	1.3545	1.39941	1.3372	1.3333	1.3566	1.3894	1.3336
1159	1.33336	1.3382	1.33827	1.3545	1.3995	1.33719	1.33336	1.35667	1.38946	1.33367
1158	1.3334	1.33821	1.3383	1.3545	1.3995	1.3373	1.3334	1.3567	1.3895	1.3337
1157	1.3334	1.3383	1.3383	1.3545	1.3995	1.3373	1.3334	1.3567	1.3895	1.3337
1156	1.3334	1.3383	1.3383	1.3545	1.3995	1.3373	1.3334	1.3567	1.3895	1.3337
1155	1.3334	1.3383	1.3383	1.3545	1.3995	1.3373	1.3334	1.3567	1.3895	1.3337
1154	1.3334	1.3383	1.3383	1.3545	1.3995	1.3373	1.3334	1.3567	1.3895	1.3337
1153	1.3334	1.3383	1.3383	1.35449	1.3995	1.3373	1.3334	1.3567	1.3895	1.3337
1152	1.3334	1.3383	1.3383	1.3546	1.3995	1.3373	1.3334	1.3567	1.3895	1.3337
1151	1.33339	1.3383	1.33829	1.3546	1.3995	1.33729	1.33339	1.35669	1.38949	1.33369
1150	1.3335	1.33831	1.3384	1.3546	1.39951	1.3374	1.3335	1.3568	1.3896	1.3338
1149	1.3335	1.3384	1.3384	1.3546	1.3996	1.3374	1.3335	1.3568	1.3896	1.3338
1148	1.3335	1.3384	1.3384	1.3546	1.3996	1.3374	1.3335	1.3568	1.3896	1.3338
1147	1.3335	1.3384	1.3384	1.3546	1.3996	1.3374	1.3335	1.3568	1.3896	1.3338
1146	1.3335	1.3384	1.3384	1.3546	1.3996	1.3374	1.3335	1.3568	1.3896	1.3338
1145	1.3335	1.3384	1.3384	1.3546	1.3996	1.3374	1.3335	1.3568	1.3896	1.3338
1144	1.3335	1.3384	1.3384	1.35462	1.3996	1.3374	1.3335	1.3568	1.3896	1.3338
1143	1.33349	1.3384	1.33839	1.3547	1.3996	1.3374	1.33349	1.35679	1.38959	1.33379
1142	1.33361	1.3384	1.33851	1.3547	1.3996	1.33743	1.33361	1.35691	1.38971	1.33391
1141	1.3336	1.33849	1.3385	1.3547	1.3996	1.3375	1.3336	1.3569	1.3897	1.3339
1140	1.3336	1.3385	1.3385	1.3547	1.39959	1.3375	1.3336	1.3569	1.3897	1.3339
1139	1.3336	1.3385	1.3385	1.3547	1.39969	1.3375	1.3336	1.3569	1.3897	1.3339
1138	1.3336	1.3385	1.3385	1.3547	1.3997	1.3375	1.3336	1.3569	1.3897	1.3339
1137	1.3336	1.3385	1.3385	1.3547	1.3997	1.3375	1.3336	1.3569	1.3897	1.3339
1136	1.3336	1.3385	1.3385	1.35469	1.3997	1.3375	1.3336	1.3569	1.3897	1.3339
1135	1.3336	1.3385	1.3385	1.3548	1.3997	1.3375	1.3336	1.3569	1.3897	1.3339
1134	1.33367	1.33849	1.33857	1.3548	1.3997	1.33757	1.33367	1.35697	1.38977	1.33397
1133	1.3337	1.33861	1.3386	1.3548	1.3997	1.3376	1.3337	1.357	1.3898	1.334
1132	1.3337	1.3386	1.3386	1.3548	1.3997	1.3376	1.3337	1.357	1.3898	1.334
1131	1.3337	1.3386	1.3386	1.3548	1.3997	1.3376	1.3337	1.357	1.3898	1.334
1130	1.3337	1.3386	1.3386	1.3548	1.3997	1.3376	1.3337	1.357	1.3898	1.334
1129	1.3337	1.3386	1.3386	1.3548	1.39975	1.3376	1.3337	1.357	1.3898	1.334
1128	1.3337	1.3386	1.3386	1.3548	1.3998	1.3376	1.3337	1.357	1.3898	1.334
1127	1.3337	1.3386	1.3386	1.35479	1.3998	1.3376	1.3337	1.357	1.3898	1.334
1126	1.33371	1.3386	1.33862	1.35491	1.3998	1.33761	1.33371	1.35702	1.38982	1.33401
1125	1.3338	1.33868	1.3387	1.3549	1.3998	1.3377	1.3338	1.3571	1.3899	1.3341
1124	1.3338	1.3387	1.3387	1.3549	1.3998	1.3377	1.3338	1.3571	1.3899	1.3341
1123	1.3338	1.3387	1.3387	1.3549	1.3998	1.3377	1.3338	1.3571	1.3899	1.3341
1122	1.3338	1.3387	1.3387	1.3549	1.3998	1.3377	1.3338	1.3571	1.3899	1.3341
1121	1.3338	1.3387	1.3387	1.3549	1.3998	1.3377	1.3338	1.3571	1.3899	1.3341
1120	1.3338	1.3387	1.3387	1.3549	1.3998	1.3377	1.3338	1.3571	1.3899	1.3341
1119	1.3338	1.3387	1.3387	1.3549	1.3998	1.3377	1.3338	1.3571	1.3899	1.3341
1118	1.3338	1.3387	1.3387	1.3549	1.39989	1.3377	1.3338	1.3571	1.3899	1.3341
1117	1.33391	1.33869	1.33881	1.35501	1.3999	1.33775	1.33391	1.35721	1.39001	1.33415
1116	1.3339	1.3388	1.3388	1.355	1.3999	1.3378	1.3339	1.3572	1.39	1.3342
1115	1.3339	1.3388	1.3388	1.355	1.3999	1.3378	1.3339	1.3572	1.39	1.3342
1114	1.3339	1.3388	1.3388	1.355	1.3999	1.3378	1.3339	1.3572	1.39	1.3342
1113	1.3339	1.3388	1.3388	1.355	1.3999	1.3378	1.3339	1.3572	1.39	1.3342
1112	1.3339	1.3388	1.3388	1.355	1.3999	1.3378	1.3339	1.3572	1.39	1.3342
1111	1.3339	1.3388	1.3388	1.355	1.3999	1.3378	1.3339	1.3572	1.39	1.3342
1110	1.3339	1.3388	1.3388	1.355	1.3999	1.3378	1.3339	1.3572	1.39	1.3342
1109	1.33394	1.3388	1.33884	1.35499	1.3999	1.33779	1.33394	1.35724	1.39004	1.33424
1108	1.334	1.3388	1.3389	1.3551	1.3999	1.3379	1.334	1.3573	1.3901	1.3343
1107	1.334	1.3389	1.3389	1.3551	1.4	1.3379	1.334	1.3573	1.3901	1.3343
1106	1.334	1.3389	1.3389	1.3551	1.4	1.3379	1.334	1.3573	1.3901	1.3343
1105	1.334	1.3389	1.3389	1.3551	1.4	1.3379	1.334	1.3573	1.3901	1.3343
1104	1.334	1.3389	1.3389	1.3551	1.4	1.3379	1.334	1.3573	1.3901	1.3343
1103	1.334	1.3389	1.3389	1.3551	1.4	1.3379	1.334	1.3573	1.3901	1.3343
1102	1.334	1.3389	1.3389	1.3551	1.4	1.3379	1.334	1.3573	1.3901	1.3343
1101	1.334	1.3389	1.3389	1.3551	1.4	1.3379	1.334	1.3573	1.3901	1.3343
1100	1.33401	1.3389	1.33891	1.3551	1.4	1.33791	1.33401	1.35731	1.39011	1.33431
1099	1.3341	1.33899	1.339	1.35519	1.4	1.338	1.3341	1.3574	1.3902	1.3344
1098	1.3341	1.339	1.339	1.3552	1.4	1.338	1.3341	1.3574	1.3902	1.3344
1097	1.3341	1.339	1.339	1.3552	1.40001	1.338	1.3341	1.3574	1.3902	1.3344
1096	1.3341	1.339	1.339	1.3552	1.4001	1.338	1.3341	1.3574	1.3902	1.3344
1095	1.3341	1.339	1.339	1.3552	1.4001	1.338	1.3341	1.3574	1.3902	1.3344
1094	1.3341	1.339	1.339	1.3552	1.4001	1.338	1.3341	1.3574	1.3902	1.3344
1093	1.3341	1.339	1.339	1.3552	1.4001	1.338	1.3341	1.3574	1.3902	1.3344
1092	1.33409	1.339	1.33899	1.3552	1.4001	1.338	1.33409	1.35739	1.39019	1.33439
1091	1.33421	1.339	1.33911	1.3552	1.4001	1.33801	1.33421	1.3575	1.39031	1.33451
1090	1.3342	1.33909	1.3391	1.35529	1.4001	1.3381	1.3342	1.3575	1.3903	1.3345
1089	1.3342	1.3391	1.3391	1.3553	1.4001	1.3381	1.3342	1.3575	1.3903	1.3345
1088	1.3342	1.3391	1.3391	1.3553	1.4001	1.3381	1.3342	1.3575	1.3903	1.3345
1087	1.3342	1.3391	1.3391	1.3553	1.4001	1.3381	1.3342	1.3575	1.3903	1.3345
1086	1.3342	1.3391	1.3391	1.3553	1.40009	1.3381	1.3342	1.3575	1.3903	1.3345
1085	1.3342	1.3391	1.3391	1.3553	1.40021	1.3381	1.3342	1.3575	1.3903	1.3345
1084	1.3342	1.3391	1.3391	1.3553	1.4002	1.3381	1.3342	1.3575	1.3903	1.3345
1083	1.33419	1.3391	1.33909	1.3553	1.4002	1.3381	1.33419	1.35749	1.39029	1.3345
1082	1.33431	1.33909	1.33921	1.3553	1.4002	1.33814	1.33431	1.35761	1.39041	1.33454
1081	1.3343	1.3392	1.3392	1.35531	1.4002	1.3382	1.3343	1.3576	1.3904	1.3346
1080	1.3343	1.3392	1.3392	1.3554	1.4002	1.3382	1.3343	1.3576	1.3904	1.3346
1079	1.3343	1.3392	1.3392	1.3554	1.4002	1.3382	1.3343	1.3576	1.3904	1.3346
1078	1.3343	1.3392	1.3392	1.3554	1.4002	1.3382	1.3343	1.3576	1.3904	1.3346
1077	1.3343	1.3392	1.3392	1.3554	1.4002	1.3382	1.3343	1.3576	1.3904	1.3346
1076	1.3343	1.3392	1.3392	1.3554	1.4002	1.3382	1.3343	1.3576	1.3904	1.3346
1075	1.3343	1.3392	1.3392	1.3554	1.40019	1.3382	1.3343	1.3576	1.3904	1.3346
1074	1.3343	1.3392	1.3392	1.3554	1.40031	1.3382	1.3343	1.3576	1.3904	1.3346
1073	1.3344	1.3392	1.33929	1.3554	1.4003	1.3383	1.3344	1.3577	1.3905	1.33469
1072	1.3344	1.3393	1.3393	1.3554	1.4003	1.3383	1.3344	1.3577	1.3905	1.3347
1071	1.3344	1.3393	1.3393	1.35544	1.4003	1.3383	1.3344	1.3577	1.3905	1.3347
1070	1.3344	1.3393	1.3393	1.3555	1.4003	1.3383	1.3344	1.3577	1.3905	1.3347
1069	1.3344	1.3393	1.3393	1.3555	1.4003	1.3383	1.3344	1.3577	1.3905	1.3347
1068	1.3344	1.3393	1.3393	1.3555	1.4003	1.3383	1.3344	1.3577	1.3905	1.3347
1067	1.3344	1.3393	1.3393	1.3555	1.4003	1.3383	1.3344	1.3577	1.3905	1.3347
1066	1.3344	1.3393	1.3393	1.3555	1.4003	1.3383	1.3344	1.3577	1.3905	1.3347
1065	1.3344	1.3393	1.3393	1.3555	1.4003	1.3383	1.3344	1.3577	1.3905	1.3347
1064	1.33447	1.3393	1.33937	1.3555	1.4003	1.33829	1.33447	1.35777	1.39057	1.33477
1063	1.3345	1.33935	1.3394	1.3555	1.40035	1.33841	1.3345	1.3578	1.3906	1.3348
1062	1.3345	1.3394	1.3394	1.3555	1.4004	1.3384	1.3345	1.3578	1.3906	1.3348
1061	1.3345	1.3394	1.3394	1.3556	1.4004	1.3384	1.3345	1.3578	1.3906	1.3348
1060	1.3345	1.3394	1.3394	1.3556	1.4004	1.3384	1.3345	1.3578	1.3906	1.3348
1059	1.3345	1.3394	1.3394	1.3556	1.4004	1.3384	1.3345	1.3578	1.3906	1.3348
1058	1.3345	1.3394	1.3394	1.3556	1.4004	1.3384	1.3345	1.3578	1.3906	1.3348
1057	1.3345	1.3394	1.3394	1.3556	1.4004	1.3384	1.3345	1.3578	1.3906	1.3348
1056	1.3345	1.3394	1.3394	1.3556	1.4004	1.3384	1.3345	1.3578	1.3906	1.3348
1055	1.33449	1.3394	1.33939	1.3556	1.4004	1.33839	1.33449	1.35779	1.39059	1.33479
1054	1.33461	1.33945	1.3395	1.3556	1.4004	1.33851	1.33461	1.3579	1.39071	1.33491
1053	1.3346	1.3395	1.3395	1.3556	1.4004	1.3385	1.3346	1.3579	1.3907	1.3349
1052	1.3346	1.3395	1.3395	1.35561	1.4004	1.3385	1.3346	1.3579	1.3907	1.3349
1051	1.3346	1.3395	1.3395	1.3557	1.4005	1.3385	1.3346	1.3579	1.3907	1.3349
1050	1.3346	1.3395	1.3395	1.3557	1.4005	1.3385	1.3346	1.3579	1.3907	1.3349
1049	1.3346	1.3395	1.3395	1.3557	1.4005	1.3385	1.3346	1.3579	1.3907	1.3349
1048	1.3346	1.3395	1.3395	1.3557	1.4005	1.3385	1.3346	1.3579	1.3907	1.3349
1047	1.3346	1.3395	1.3395	1.3557	1.4005	1.3385	1.3346	1.3579	1.3907	1.3349
1046	1.3346	1.3395	1.3395	1.3557	1.4005	1.3385	1.3346	1.3579	1.3907	1.3349
1045	1.33469	1.3395	1.33959	1.3557	1.4005	1.33859	1.33469	1.35799	1.39079	1.33499
1044	1.3347	1.3396	1.3396	1.3557	1.4005	1.3386	1.3347	1.358	1.3908	1.335
1043	1.3347	1.3396	1.3396	1.3557	1.4005	1.3386	1.3347	1.358	1.3908	1.335
1042	1.3347	1.3396	1.3396	1.35573	1.4005	1.3386	1.3347	1.358	1.3908	1.335
1041	1.3347	1.3396	1.3396	1.3558	1.4005	1.3386	1.3347	1.358	1.3908	1.335
1040	1.3347	1.3396	1.3396	1.3558	1.4005	1.3386	1.3347	1.358	1.3908	1.335
1039	1.3347	1.3396	1.3396	1.3558	1.4006	1.3386	1.3347	1.358	1.3908	1.335
1038	1.3347	1.3396	1.3396	1.3558	1.4006	1.3386	1.3347	1.358	1.3908	1.335
1037	1.3347	1.3396	1.3396	1.3558	1.4006	1.3386	1.3347	1.358	1.3908	1.335
1036	1.33475	1.3396	1.33965	1.3558	1.4006	1.33859	1.33475	1.35805	1.39085	1.33505
1035	1.3348	1.33963	1.3397	1.3558	1.4006	1.33871	1.3348	1.3581	1.3909	1.3351
1034	1.3348	1.3397	1.3397	1.3558	1.4006	1.3387	1.3348	1.3581	1.3909	1.3351
1033	1.3348	1.3397	1.3397	1.3558	1.4006	1.3387	1.3348	1.3581	1.3909	1.3351
1032	1.3348	1.3397	1.3397	1.3558	1.4006	1.3387	1.3348	1.3581	1.3909	1.3351
1031	1.3348	1.3397	1.3397	1.3559	1.4006	1.3387	1.3348	1.3581	1.3909	1.3351
1030	1.3348	1.3397	1.3397	1.3559	1.4006	1.3387	1.3348	1.3581	1.3909	1.3351
1029	1.3348	1.3397	1.3397	1.3559	1.4006	1.3387	1.3348	1.3581	1.3909	1.3351
1028	1.3348	1.3397	1.3397	1.3559	1.40059	1.3387	1.3348	1.3581	1.3909	1.3351
1027	1.33479	1.3397	1.33969	1.3559	1.40071	1.3387	1.33479	1.35809	1.3909	1.3351
1026	1.33491	1.3397	1.33981	1.3559	1.4007	1.33873	1.33491	1.35821	1.39093	1.33513
1025	1.3349	1.33981	1.3398	1.3559	1.4007	1.3388	1.3349	1.3582	1.391	1.3352
1024	1.3349	1.3398	1.3398	1.3559	1.4007	1.3388	1.3349	1.3582	1.391	1.3352
1023	1.3349	1.3398	1.3398	1.3559	1.4007	1.3388	1.3349	1.3582	1.391	1.3352
1022	1.3349	1.3398	1.3398	1.3559	1.4007	1.3388	1.3349	1.3582	1.391	1.3352
1021	1.3349	1.3398	1.3398	1.35599	1.4007	1.3388	1.3349	1.3582	1.391	1.3352
1020	1.3349	1.3398	1.3398	1.356	1.4007	1.3388	1.3349	1.3582	1.391	1.3352
1019	1.3349	1.3398	1.3398	1.356	1.4007	1.3388	1.3349	1.3582	1.391	1.3352
1018	1.3349	1.3398	1.3398	1.356	1.4007	1.3388	1.3349	1.3582	1.391	1.3352
1017	1.33489	1.3398	1.33979	1.356	1.4007	1.3388	1.33489	1.35819	1.39099	1.33519
1016	1.33501	1.33979	1.33991	1.356	1.4007	1.33885	1.33501	1.35831	1.39111	1.33531
1015	1.335	1.33991	1.3399	1.356	1.40074	1.3389	1.335	1.3583	1.3911	1.3353
1014	1.335	1.3399	1.3399	1.356	1.4008	1.3389	1.335	1.3583	1.3911	1.3353
1013	1.335	1.3399	1.3399	1.356	1.4008	1.3389	1.335	1.3583	1.3911	1.3353
1012	1.335	1.3399	1.3399	1.356	1.4008	1.3389	1.335	1.3583	1.3911	1.3353
1011	1.335	1.3399	1.3399	1.35602	1.4008	1.3389	1.335	1.3583	1.3911	1.3353
1010	1.335	1.3399	1.3399	1.3561	1.4008	1.3389	1.335	1.3583	1.3911	1.3353
1009	1.335	1.3399	1.3399	1.3561	1.4008	1.3389	1.335	1.3583	1.3911	1.3353
1008	1.335	1.3399	1.3399	1.3561	1.4008	1.3389	1.335	1.3583	1.3911	1.3353
1007	1.335	1.3399	1.3399	1.3561	1.4008	1.3389	1.335	1.3583	1.3911	1.3353
1006	1.3351	1.3399	1.34	1.3561	1.4008	1.339	1.3351	1.3584	1.3912	1.3354
1005	1.3351	1.34	1.34	1.3561	1.4008	1.339	1.3351	1.3584	1.3912	1.3354
1004	1.3351	1.34	1.34	1.3561	1.4008	1.339	1.3351	1.3584	1.3912	1.3354
1003	1.3351	1.34	1.34	1.3561	1.4008	1.339	1.3351	1.3584	1.3912	1.3354
1002	1.3351	1.34	1.34	1.3561	1.4009	1.339	1.3351	1.3584	1.3912	1.3354
1001	1.3351	1.34	1.34	1.3561	1.4009	1.339	1.3351	1.3584	1.3912	1.3354
1000	1.3351	1.34	1.34	1.3562	1.4009	1.339	1.3351	1.3584	1.3912	1.3354
999	1.3351	1.34	1.34	1.3562	1.4009	1.339	1.3351	1.3584	1.3912	1.3354
998	1.3351	1.34	1.34	1.3562	1.4009	1.339	1.3351	1.3584	1.3912	1.3354
997	1.3351	1.34	1.34	1.3562	1.4009	1.339	1.3351	1.3584	1.3912	1.3354
996	1.3352	1.34	1.3401	1.3562	1.4009	1.339	1.3352	1.3585	1.3913	1.3355
995	1.3352	1.3401	1.3401	1.3562	1.4009	1.3391	1.3352	1.3585	1.3913	1.3355
994	1.3352	1.3401	1.3401	1.3562	1.4009	1.3391	1.3352	1.3585	1.3913	1.3355
993	1.3352	1.3401	1.3401	1.3562	1.4009	1.3391	1.3352	1.3585	1.3913	1.3355
992	1.3352	1.3401	1.3401	1.3562	1.4009	1.3391	1.3352	1.3585	1.3913	1.3355
991	1.3352	1.3401	1.3401	1.3562	1.4009	1.3391	1.3352	1.3585	1.3913	1.3355
990	1.3352	1.3401	1.3401	1.3562	1.40091	1.3391	1.3352	1.3585	1.3913	1.3355
989	1.3352	1.3401	1.3401	1.35631	1.401	1.3391	1.3352	1.3585	1.3913	1.3355
988	1.3352	1.3401	1.3401	1.3563	1.401	1.3391	1.3352	1.3585	1.3913	1.3355
987	1.3352	1.3401	1.3401	1.3563	1.401	1.3391	1.3352	1.3585	1.3913	1.3355
986	1.33524	1.3401	1.34014	1.3563	1.401	1.33909	1.33524	1.35854	1.39134	1.33554
985	1.3353	1.34014	1.3402	1.3563	1.401	1.33921	1.3353	1.3586	1.3914	1.3356
984	1.3353	1.3402	1.3402	1.3563	1.401	1.3392	1.3353	1.3586	1.3914	1.3356
983	1.3353	1.3402	1.3402	1.3563	1.401	1.3392	1.3353	1.3586	1.3914	1.3356
982	1.3353	1.3402	1.3402	1.3563	1.401	1.3392	1.3353	1.3586	1.3914	1.3356
981	1.3353	1.3402	1.3402	1.3563	1.401	1.3392	1.3353	1.3586	1.3914	1.3356
980	1.3353	1.3402	1.3402	1.3563	1.401	1.3392	1.3353	1.3586	1.3914	1.3356
979	1.3353	1.3402	1.3402	1.3563	1.401	1.3392	1.3353	1.3586	1.3914	1.3356
978	1.3353	1.3402	1.3402	1.3564	1.401	1.3392	1.3353	1.3586	1.3914	1.3356
977	1.3353	1.3402	1.3402	1.3564	1.40101	1.3392	1.3353	1.3586	1.3914	1.3356
976	1.3353	1.3402	1.3402	1.3564	1.4011	1.3392	1.3353	1.3586	1.3914	1.3356
975	1.33541	1.3402	1.34031	1.3564	1.4011	1.33922	1.33541	1.35871	1.39151	1.33571
974	1.3354	1.34031	1.3403	1.3564	1.4011	1.3393	1.3354	1.3587	1.3915	1.3357
973	1.3354	1.3403	1.3403	1.3564	1.4011	1.3393	1.3354	1.3587	1.3915	1.3357
972	1.3354	1.3403	1.3403	1.3564	1.4011	1.3393	1.3354	1.3587	1.3915	1.3357
971	1.3354	1.3403	1.3403	1.3564	1.4011	1.3393	1.3354	1.3587	1.3915	1.3357
970	1.3354	1.3403	1.3403	1.3564	1.4011	1.3393	1.3354	1.3587	1.3915	1.3357
969	1.3354	1.3403	1.3403	1.3564	1.4011	1.3393	1.3354	1.3587	1.3915	1.3357
968	1.3354	1.3403	1.3403	1.3564	1.4011	1.3393	1.3354	1.3587	1.3915	1.3357
967	1.3354	1.3403	1.3403	1.35651	1.4011	1.3393	1.3354	1.3587	1.3915	1.3357
966	1.3354	1.3403	1.3403	1.3565	1.4011	1.3393	1.3354	1.3587	1.3915	1.3357
965	1.33539	1.3403	1.34029	1.3565	1.4011	1.33929	1.33539	1.35869	1.39155	1.33569
964	1.3355	1.34037	1.3404	1.3565	1.4011	1.3394	1.3355	1.3588	1.3916	1.3358
963	1.3355	1.3404	1.3404	1.3565	1.40119	1.3394	1.3355	1.3588	1.3916	1.3358
962	1.3355	1.3404	1.3404	1.3565	1.4012	1.3394	1.3355	1.3588	1.3916	1.3358
961	1.3355	1.3404	1.3404	1.3565	1.4012	1.3394	1.3355	1.3588	1.3916	1.3358
960	1.3355	1.3404	1.3404	1.3565	1.4012	1.3394	1.3355	1.3588	1.3916	1.3358
959	1.3355	1.3404	1.3404	1.3565	1.4012	1.3394	1.3355	1.3588	1.3916	1.3358
958	1.3355	1.3404	1.3404	1.3565	1.4012	1.3394	1.3355	1.3588	1.3916	1.3358
957	1.3355	1.3404	1.3404	1.3565	1.4012	1.3394	1.3355	1.3588	1.3916	1.3358
956	1.3355	1.3404	1.3404	1.3565	1.4012	1.3394	1.3355	1.3588	1.3916	1.3358
955	1.3355	1.3404	1.3404	1.3566	1.4012	1.3394	1.3355	1.3588	1.3916	1.3358
954	1.33554	1.3404	1.34044	1.3566	1.4012	1.33939	1.33554	1.35884	1.39164	1.33584
953	1.3356	1.34047	1.3405	1.3566	1.4012	1.3395	1.3356	1.3589	1.3917	1.3359
952	1.3356	1.3405	1.3405	1.3566	1.4012	1.3395	1.3356	1.3589	1.3917	1.3359
951	1.3356	1.3405	1.3405	1.3566	1.4012	1.3395	1.3356	1.3589	1.3917	1.3359
950	1.3356	1.3405	1.3405	1.3566	1.40122	1.3395	1.3356	1.3589	1.3917	1.3359
949	1.3356	1.3405	1.3405	1.3566	1.4013	1.3395	1.3356	1.3589	1.3917	1.3359
948	1.3356	1.3405	1.3405	1.3566	1.4013	1.3395	1.3356	1.3589	1.3917	1.3359
947	1.3356	1.3405	1.3405	1.3566	1.4013	1.3395	1.3356	1.3589	1.3917	1.3359
946	1.3356	1.3405	1.3405	1.3566	1.4013	1.3395	1.3356	1.3589	1.3917	1.3359
945	1.3356	1.3405	1.3405	1.35659	1.4013	1.3395	1.3356	1.3589	1.3917	1.3359
944	1.3356	1.3405	1.3405	1.3567	1.4013	1.3395	1.3356	1.3589	1.3917	1.3359
943	1.33569	1.3405	1.34059	1.3567	1.4013	1.3395	1.33569	1.35899	1.39179	1.3359
942	1.3357	1.34061	1.3406	1.3567	1.4013	1.3396	1.3357	1.359	1.3918	1.336
941	1.3357	1.3406	1.3406	1.3567	1.4013	1.3396	1.3357	1.359	1.3918	1.336
940	1.3357	1.3406	1.3406	1.3567	1.4013	1.3396	1.3357	1.359	1.3918	1.336
939	1.3357	1.3406	1.3406	1.3567	1.4013	1.3396	1.3357	1.359	1.3918	1.336
938	1.3357	1.3406	1.3406	1.3567	1.4013	1.3396	1.3357	1.359	1.3918	1.336
937	1.3357	1.3406	1.3406	1.3567	1.4013	1.3396	1.3357	1.359	1.3918	1.336
936	1.3357	1.3406	1.3406	1.3567	1.40138	1.3396	1.3357	1.359	1.3918	1.336
935	1.3357	1.3406	1.3406	1.3567	1.4014	1.3396	1.3357	1.359	1.3918	1.336
934	1.3357	1.3406	1.3406	1.3567	1.4014	1.3396	1.3357	1.359	1.3918	1.336
933	1.3357	1.3406	1.3406	1.35676	1.4014	1.3396	1.3357	1.359	1.3918	1.336
932	1.3357	1.3406	1.34069	1.3568	1.4014	1.3396	1.3358	1.35909	1.3919	1.336
931	1.3358	1.34071	1.3407	1.3568	1.4014	1.3397	1.3358	1.3591	1.3919	1.3361
930	1.3358	1.3407	1.3407	1.3568	1.4014	1.3397	1.3358	1.3591	1.3919	1.3361
929	1.3358	1.3407	1.3407	1.3568	1.4014	1.3397	1.3358	1.3591	1.3919	1.3361
928	1.3358	1.3407	1.3407	1.3568	1.4014	1.3397	1.3358	1.3591	1.3919	1.3361
927	1.3358	1.3407	1.3407	1.3568	1.4014	1.3397	1.3358	1.3591	1.3919	1.3361
926	1.3358	1.3407	1.3407	1.3568	1.4014	1.3397	1.3358	1.3591	1.3919	1.3361
925	1.3358	1.3407	1.3407	1.3568	1.4014	1.3397	1.3358	1.3591	1.3919	1.3361
924	1.3358	1.3407	1.3407	1.3568	1.4014	1.3397	1.3358	1.3591	1.3919	1.3361
923	1.3358	1.3407	1.3407	1.3568	1.4014	1.3397	1.3358	1.3591	1.3919	1.3361
922	1.3358	1.3407	1.3407	1.3568	1.40151	1.3397	1.3358	1.3591	1.3919	1.3361
921	1.33579	1.3407	1.34069	1.35686	1.4015	1.33969	1.33579	1.35909	1.39196	1.33609
920	1.3359	1.3407	1.3408	1.3569	1.4015	1.3398	1.3359	1.3592	1.392	1.3362
919	1.3359	1.3408	1.3408	1.3569	1.4015	1.3398	1.3359	1.3592	1.392	1.3362
918	1.3359	1.3408	1.3408	1.3569	1.4015	1.3398	1.3359	1.3592	1.392	1.3362
917	1.3359	1.3408	1.3408	1.3569	1.4015	1.3398	1.3359	1.3592	1.392	1.3362
916	1.3359	1.3408	1.3408	1.3569	1.4015	1.3398	1.3359	1.3592	1.392	1.3362
915	1.3359	1.3408	1.3408	1.3569	1.4015	1.3398	1.3359	1.3592	1.392	1.3362
914	1.3359	1.3408	1.3408	1.3569	1.4015	1.3398	1.3359	1.3592	1.392	1.3362
913	1.3359	1.3408	1.3408	1.3569	1.4015	1.3398	1.3359	1.3592	1.392	1.3362
912	1.3359	1.3408	1.3408	1.3569	1.4015	1.3398	1.3359	1.3592	1.392	1.3362
911	1.3359	1.3408	1.3408	1.3569	1.4015	1.3398	1.3359	1.3592	1.392	1.3362
910	1.3359	1.3408	1.3408	1.3569	1.4015	1.3398	1.3359	1.3592	1.392	1.3362
909	1.33601	1.3408	1.34091	1.35692	1.4015	1.33982	1.33601	1.35931	1.39211	1.33631
908	1.336	1.3409	1.3409	1.357	1.40157	1.3399	1.336	1.3593	1.3921	1.3363
907	1.336	1.3409	1.3409	1.357	1.4016	1.3399	1.336	1.3593	1.3921	1.3363
906	1.336	1.3409	1.3409	1.357	1.4016	1.3399	1.336	1.3593	1.3921	1.3363
905	1.336	1.3409	1.3409	1.357	1.4016	1.3399	1.336	1.3593	1.3921	1.3363
904	1.336	1.3409	1.3409	1.357	1.4016	1.3399	1.336	1.3593	1.3921	1.3363
903	1.336	1.3409	1.3409	1.357	1.4016	1.3399	1.336	1.3593	1.3921	1.3363
902	1.336	1.3409	1.3409	1.357	1.4016	1.3399	1.336	1.3593	1.3921	1.3363
901	1.336	1.3409	1.3409	1.357	1.4016	1.3399	1.336	1.3593	1.3921	1.3363
900	1.336	1.3409	1.3409	1.357	1.4016	1.3399	1.336	1.3593	1.3921	1.3363
899	1.336	1.3409	1.3409	1.357	1.4016	1.3399	1.336	1.3593	1.3921	1.3363
898	1.33601	1.3409	1.34091	1.357	1.4016	1.3399	1.33601	1.35931	1.39211	1.3363
897	1.3361	1.34097	1.341	1.35699	1.4016	1.34	1.3361	1.3594	1.3922	1.3364
896	1.3361	1.341	1.341	1.3571	1.4016	1.34	1.3361	1.3594	1.3922	1.3364
895	1.3361	1.341	1.341	1.3571	1.4016	1.34	1.3361	1.3594	1.3922	1.3364
894	1.3361	1.341	1.341	1.3571	1.4016	1.34	1.3361	1.3594	1.3922	1.3364
893	1.3361	1.341	1.341	1.3571	1.4017	1.34	1.3361	1.3594	1.3922	1.3364
892	1.3361	1.341	1.341	1.3571	1.4017	1.34	1.3361	1.3594	1.3922	1.3364
891	1.3361	1.341	1.341	1.3571	1.4017	1.34	1.3361	1.3594	1.3922	1.3364
890	1.3361	1.341	1.341	1.3571	1.4017	1.34	1.3361	1.3594	1.3922	1.3364
889	1.3361	1.341	1.341	1.3571	1.4017	1.34	1.3361	1.3594	1.3922	1.3364
888	1.3361	1.341	1.341	1.3571	1.4017	1.34	1.3361	1.3594	1.3922	1.3364
887	1.3361	1.341	1.341	1.3571	1.4017	1.34	1.3361	1.3594	1.3922	1.3364
886	1.33613	1.341	1.34103	1.3571	1.4017	1.34	1.33613	1.35943	1.39223	1.33643
885	1.3362	1.34109	1.3411	1.3571	1.4017	1.3401	1.3362	1.3595	1.3923	1.3365
884	1.3362	1.3411	1.3411	1.35721	1.4017	1.3401	1.3362	1.3595	1.3923	1.3365
883	1.3362	1.3411	1.3411	1.3572	1.4017	1.3401	1.3362	1.3595	1.3923	1.3365
882	1.3362	1.3411	1.3411	1.3572	1.4017	1.3401	1.3362	1.3595	1.3923	1.3365
881	1.3362	1.3411	1.3411	1.3572	1.4017	1.3401	1.3362	1.3595	1.3923	1.3365
880	1.3362	1.3411	1.3411	1.3572	1.4017	1.3401	1.3362	1.3595	1.3923	1.3365
879	1.3362	1.3411	1.3411	1.3572	1.4017	1.3401	1.3362	1.3595	1.3923	1.3365
878	1.3362	1.3411	1.3411	1.3572	1.4018	1.3401	1.3362	1.3595	1.3923	1.3365
877	1.3362	1.3411	1.3411	1.3572	1.4018	1.3401	1.3362	1.3595	1.3923	1.3365
876	1.3362	1.3411	1.3411	1.3572	1.4018	1.3401	1.3362	1.3595	1.3923	1.3365
875	1.3362	1.3411	1.3411	1.3572	1.4018	1.3401	1.3362	1.3595	1.3923	1.3365
874	1.33623	1.3411	1.34113	1.3572	1.4018	1.3401	1.33623	1.35953	1.39233	1.33653
873	1.3363	1.3412	1.3412	1.3572	1.4018	1.3402	1.3363	1.3596	1.3924	1.3366
872	1.3363	1.3412	1.3412	1.35719	1.4018	1.3402	1.3363	1.3596	1.3924	1.3366
871	1.3363	1.3412	1.3412	1.3573	1.4018	1.3402	1.3363	1.3596	1.3924	1.3366
870	1.3363	1.3412	1.3412	1.3573	1.4018	1.3402	1.3363	1.3596	1.3924	1.3366
869	1.3363	1.3412	1.3412	1.3573	1.4018	1.3402	1.3363	1.3596	1.3924	1.3366
868	1.3363	1.3412	1.3412	1.3573	1.4018	1.3402	1.3363	1.3596	1.3924	1.3366
867	1.3363	1.3412	1.3412	1.3573	1.4018	1.3402	1.3363	1.3596	1.3924	1.3366
866	1.3363	1.3412	1.3412	1.3573	1.4018	1.3402	1.3363	1.3596	1.3924	1.3366
865	1.3363	1.3412	1.3412	1.3573	1.4018	1.3402	1.3363	1.3596	1.3924	1.3366
864	1.3363	1.3412	1.3412	1.3573	1.4018	1.3402	1.3363	1.3596	1.3924	1.3366
863	1.3363	1.3412	1.3412	1.3573	1.40185	1.3402	1.3363	1.3596	1.3924	1.3366
862	1.3363	1.3412	1.3412	1.3573	1.4019	1.3402	1.3363	1.3596	1.3924	1.3366
861	1.3364	1.34119	1.3413	1.3573	1.4019	1.34029	1.3364	1.3597	1.3925	1.3367
860	1.3364	1.3413	1.3413	1.3573	1.4019	1.3403	1.3364	1.3597	1.3925	1.3367
859	1.3364	1.3413	1.3413	1.3573	1.4019	1.3403	1.3364	1.3597	1.3925	1.3367
858	1.3364	1.3413	1.3413	1.3574	1.4019	1.3403	1.3364	1.3597	1.3925	1.3367
857	1.3364	1.3413	1.3413	1.3574	1.4019	1.3403	1.3364	1.3597	1.3925	1.3367
856	1.3364	1.3413	1.3413	1.3574	1.4019	1.3403	1.3364	1.3597	1.3925	1.3367
855	1.3364	1.3413	1.3413	1.3574	1.4019	1.3403	1.3364	1.3597	1.3925	1.3367
854	1.3364	1.3413	1.3413	1.3574	1.4019	1.3403	1.3364	1.3597	1.3925	1.3367
853	1.3364	1.3413	1.3413	1.3574	1.4019	1.3403	1.3364	1.3597	1.3925	1.3367
852	1.3364	1.3413	1.3413	1.3574	1.4019	1.3403	1.3364	1.3597	1.3925	1.3367
851	1.3364	1.3413	1.3413	1.3574	1.4019	1.3403	1.3364	1.3597	1.3925	1.3367
850	1.3364	1.3413	1.3413	1.3574	1.4019	1.3403	1.3364	1.3597	1.3925	1.3367
849	1.33648	1.3413	1.34137	1.3574	1.4019	1.34029	1.33648	1.35977	1.39257	1.33678
848	1.3365	1.34141	1.3414	1.3574	1.40189	1.3404	1.3365	1.3598	1.3926	1.3368
847	1.3365	1.3414	1.3414	1.3574	1.402	1.3404	1.3365	1.3598	1.3926	1.3368
846	1.3365	1.3414	1.3414	1.3574	1.402	1.3404	1.3365	1.3598	1.3926	1.3368
845	1.3365	1.3414	1.3414	1.3575	1.402	1.3404	1.3365	1.3598	1.3926	1.3368
844	1.3365	1.3414	1.3414	1.3575	1.402	1.3404	1.3365	1.3598	1.3926	1.3368
843	1.3365	1.3414	1.3414	1.3575	1.402	1.3404	1.3365	1.3598	1.3926	1.3368
842	1.3365	1.3414	1.3414	1.3575	1.402	1.3404	1.3365	1.3598	1.3926	1.3368
841	1.3365	1.3414	1.3414	1.3575	1.402	1.3404	1.3365	1.3598	1.3926	1.3368
840	1.3365	1.3414	1.3414	1.3575	1.402	1.3404	1.3365	1.3598	1.3926	1.3368
839	1.3365	1.3414	1.3414	1.3575	1.402	1.3404	1.3365	1.3598	1.3926	1.3368
838	1.3365	1.3414	1.3414	1.3575	1.402	1.3404	1.3365	1.3598	1.3926	1.3368
837	1.3365	1.3414	1.3414	1.3575	1.402	1.3404	1.3365	1.3598	1.3926	1.3368
836	1.33661	1.3414	1.34151	1.3575	1.402	1.34043	1.33661	1.35991	1.39271	1.33691
835	1.3366	1.3415	1.3415	1.3575	1.402	1.3405	1.3366	1.3599	1.3927	1.3369
834	1.3366	1.3415	1.3415	1.3575	1.402	1.3405	1.3366	1.3599	1.3927	1.3369
833	1.3366	1.3415	1.3415	1.3575	1.402	1.3405	1.3366	1.3599	1.3927	1.3369
832	1.3366	1.3415	1.3415	1.35759	1.402	1.3405	1.3366	1.3599	1.3927	1.3369
831	1.3366	1.3415	1.3415	1.3576	1.4021	1.3405	1.3366	1.3599	1.3927	1.3369
830	1.3366	1.3415	1.3415	1.3576	1.4021	1.3405	1.3366	1.3599	1.3927	1.3369
829	1.3366	1.3415	1.3415	1.3576	1.4021	1.3405	1.3366	1.3599	1.3927	1.3369
828	1.3366	1.3415	1.3415	1.3576	1.4021	1.3405	1.3366	1.3599	1.3927	1.3369
827	1.3366	1.3415	1.3415	1.3576	1.4021	1.3405	1.3366	1.3599	1.3927	1.3369
826	1.3366	1.3415	1.3415	1.3576	1.4021	1.3405	1.3366	1.3599	1.3927	1.3369
825	1.3366	1.3415	1.3415	1.3576	1.4021	1.3405	1.3366	1.3599	1.3927	1.3369
824	1.3366	1.3415	1.3415	1.3576	1.4021	1.3405	1.3366	1.3599	1.3927	1.3369
823	1.3367	1.3415	1.3416	1.3576	1.4021	1.34051	1.3367	1.36	1.3928	1.337
822	1.3367	1.3416	1.3416	1.3576	1.4021	1.3406	1.3367	1.36	1.3928	1.337
821	1.3367	1.3416	1.3416	1.3576	1.4021	1.3406	1.3367	1.36	1.3928	1.337
820	1.3367	1.3416	1.3416	1.3576	1.4021	1.3406	1.3367	1.36	1.3928	1.337
819	1.3367	1.3416	1.3416	1.3576	1.4021	1.3406	1.3367	1.36	1.3928	1.337
818	1.3367	1.3416	1.3416	1.3577	1.4021	1.3406	1.3367	1.36	1.3928	1.337
817	1.3367	1.3416	1.3416	1.3577	1.4021	1.3406	1.3367	1.36	1.3928	1.337
816	1.3367	1.3416	1.3416	1.3577	1.4021	1.3406	1.3367	1.36	1.3928	1.337
815	1.3367	1.3416	1.3416	1.3577	1.4022	1.3406	1.3367	1.36	1.3928	1.337
814	1.3367	1.3416	1.3416	1.3577	1.4022	1.3406	1.3367	1.36	1.3928	1.337
813	1.3367	1.3416	1.3416	1.3577	1.4022	1.3406	1.3367	1.36	1.3928	1.337
812	1.3367	1.3416	1.3416	1.3577	1.4022	1.3406	1.3367	1.36	1.3928	1.337
811	1.3367	1.3416	1.3416	1.3577	1.4022	1.3406	1.3367	1.36	1.3928	1.337
810	1.33681	1.3416	1.3417	1.3577	1.4022	1.3406	1.33681	1.3601	1.39291	1.3371
809	1.3368	1.3417	1.3417	1.3577	1.4022	1.3407	1.3368	1.3601	1.3929	1.3371
808	1.3368	1.3417	1.3417	1.3577	1.4022	1.3407	1.3368	1.3601	1.3929	1.3371
807	1.3368	1.3417	1.3417	1.3577	1.4022	1.3407	1.3368	1.3601	1.3929	1.3371
806	1.3368	1.3417	1.3417	1.3577	1.4022	1.3407	1.3368	1.3601	1.3929	1.3371
805	1.3368	1.3417	1.3417	1.3577	1.4022	1.3407	1.3368	1.3601	1.3929	1.3371
804	1.3368	1.3417	1.3417	1.35776	1.4022	1.3407	1.3368	1.3601	1.3929	1.3371
803	1.3368	1.3417	1.3417	1.3578	1.4022	1.3407	1.3368	1.3601	1.3929	1.3371
802	1.3368	1.3417	1.3417	1.3578	1.4022	1.3407	1.3368	1.3601	1.3929	1.3371
801	1.3368	1.3417	1.3417	1.3578	1.4022	1.3407	1.3368	1.3601	1.3929	1.3371
800	1.3368	1.3417	1.3417	1.3578	1.4022	1.3407	1.3368	1.3601	1.3929	1.3371
799	1.3368	1.3417	1.3417	1.3578	1.4022	1.3407	1.3368	1.3601	1.3929	1.3371
798	1.3368	1.3417	1.3417	1.3578	1.40231	1.3407	1.3368	1.3601	1.3929	1.3371
797	1.33679	1.3417	1.34169	1.3578	1.4023	1.3407	1.33679	1.3601	1.39289	1.33709
796	1.3369	1.34176	1.3418	1.3578	1.4023	1.34081	1.3369	1.3602	1.393	1.3372
795	1.3369	1.3418	1.3418	1.3578	1.4023	1.3408	1.3369	1.3602	1.393	1.3372
794	1.3369	1.3418	1.3418	1.3578	1.4023	1.3408	1.3369	1.3602	1.393	1.3372
793	1.3369	1.3418	1.3418	1.3578	1.4023	1.3408	1.3369	1.3602	1.393	1.3372
792	1.3369	1.3418	1.3418	1.3578	1.4023	1.3408	1.3369	1.3602	1.393	1.3372
791	1.3369	1.3418	1.3418	1.3578	1.4023	1.3408	1.3369	1.3602	1.393	1.3372
790	1.3369	1.3418	1.3418	1.35779	1.4023	1.3408	1.3369	1.3602	1.393	1.3372
789	1.3369	1.3418	1.3418	1.3579	1.4023	1.3408	1.3369	1.3602	1.393	1.3372
788	1.3369	1.3418	1.3418	1.3579	1.4023	1.3408	1.3369	1.3602	1.393	1.3372
787	1.3369	1.3418	1.3418	1.3579	1.4023	1.3408	1.3369	1.3602	1.393	1.3372
786	1.3369	1.3418	1.3418	1.3579	1.4023	1.3408	1.3369	1.3602	1.393	1.3372
785	1.3369	1.3418	1.3418	1.3579	1.4023	1.3408	1.3369	1.3602	1.393	1.3372
784	1.3369	1.3418	1.3418	1.3579	1.4023	1.3408	1.3369	1.3602	1.393	1.3372
783	1.33692	1.3418	1.34182	1.3579	1.4023	1.3408	1.33692	1.36022	1.39302	1.3372
782	1.337	1.34186	1.3419	1.3579	1.4023	1.34091	1.337	1.3603	1.3931	1.3373
781	1.337	1.3419	1.3419	1.3579	1.40239	1.3409	1.337	1.3603	1.3931	1.3373
780	1.337	1.3419	1.3419	1.3579	1.4024	1.3409	1.337	1.3603	1.3931	1.3373
779	1.337	1.3419	1.3419	1.3579	1.4024	1.3409	1.337	1.3603	1.3931	1.3373
778	1.337	1.3419	1.3419	1.3579	1.4024	1.3409	1.337	1.3603	1.3931	1.3373
777	1.337	1.3419	1.3419	1.3579	1.4024	1.3409	1.337	1.3603	1.3931	1.3373
776	1.337	1.3419	1.3419	1.3579	1.4024	1.3409	1.337	1.3603	1.3931	1.3373
775	1.337	1.3419	1.3419	1.35797	1.4024	1.3409	1.337	1.3603	1.3931	1.3373
774	1.337	1.3419	1.3419	1.358	1.4024	1.3409	1.337	1.3603	1.3931	1.3373
773	1.337	1.3419	1.3419	1.358	1.4024	1.3409	1.337	1.3603	1.3931	1.3373
772	1.337	1.3419	1.3419	1.358	1.4024	1.3409	1.337	1.3603	1.3931	1.3373
771	1.337	1.3419	1.3419	1.358	1.4024	1.3409	1.337	1.3603	1.3931	1.3373
770	1.337	1.3419	1.3419	1.358	1.4024	1.3409	1.337	1.3603	1.3931	1.3373
769	1.33699	1.3419	1.34189	1.358	1.4024	1.3409	1.33699	1.36029	1.39309	1.3373
768	1.3371	1.34191	1.342	1.358	1.4024	1.34101	1.3371	1.3604	1.3932	1.3374
767	1.3371	1.342	1.342	1.358	1.4024	1.341	1.3371	1.3604	1.3932	1.3374
766	1.3371	1.342	1.342	1.358	1.4024	1.341	1.3371	1.3604	1.3932	1.3374
765	1.3371	1.342	1.342	1.358	1.4024	1.341	1.3371	1.3604	1.3932	1.3374
764	1.3371	1.342	1.342	1.358	1.4024	1.341	1.3371	1.3604	1.3932	1.3374
763	1.3371	1.342	1.342	1.358	1.40251	1.341	1.3371	1.3604	1.3932	1.3374
762	1.3371	1.342	1.342	1.358	1.4025	1.341	1.3371	1.3604	1.3932	1.3374
761	1.3371	1.342	1.342	1.358	1.4025	1.341	1.3371	1.3604	1.3932	1.3374
760	1.3371	1.342	1.342	1.35806	1.4025	1.341	1.3371	1.3604	1.3932	1.3374
759	1.3371	1.342	1.342	1.3581	1.4025	1.341	1.3371	1.3604	1.3932	1.3374
758	1.3371	1.342	1.342	1.3581	1.4025	1.341	1.3371	1.3604	1.3932	1.3374
757	1.3371	1.342	1.342	1.3581	1.4025	1.341	1.3371	1.3604	1.3932	1.3374
756	1.3371	1.342	1.342	1.3581	1.4025	1.341	1.3371	1.3604	1.3932	1.3374
755	1.3371	1.342	1.342	1.3581	1.4025	1.341	1.3371	1.3604	1.3932	1.3374
754	1.33721	1.342	1.34211	1.3581	1.4025	1.34099	1.33721	1.36051	1.39331	1.33751
753	1.3372	1.3421	1.3421	1.3581	1.4025	1.3411	1.3372	1.3605	1.3933	1.3375
752	1.3372	1.3421	1.3421	1.3581	1.4025	1.3411	1.3372	1.3605	1.3933	1.3375
751	1.3372	1.3421	1.3421	1.3581	1.4025	1.3411	1.3372	1.3605	1.3933	1.3375
750	1.3372	1.3421	1.3421	1.3581	1.4025	1.3411	1.3372	1.3605	1.3933	1.3375
749	1.3372	1.3421	1.3421	1.3581	1.4025	1.3411	1.3372	1.3605	1.3933	1.3375
748	1.3372	1.3421	1.3421	1.3581	1.4025	1.3411	1.3372	1.3605	1.3933	1.3375
747	1.3372	1.3421	1.3421	1.3581	1.4025	1.3411	1.3372	1.3605	1.3933	1.3375
746	1.3372	1.3421	1.3421	1.3581	1.4025	1.3411	1.3372	1.3605	1.3933	1.3375
745	1.3372	1.3421	1.3421	1.3581	1.40256	1.3411	1.3372	1.3605	1.3933	1.3375
744	1.3372	1.3421	1.3421	1.3582	1.4026	1.3411	1.3372	1.3605	1.3933	1.3375
743	1.3372	1.3421	1.3421	1.3582	1.4026	1.3411	1.3372	1.3605	1.3933	1.3375
742	1.3372	1.3421	1.3421	1.3582	1.4026	1.3411	1.3372	1.3605	1.3933	1.3375
741	1.3372	1.3421	1.3421	1.3582	1.4026	1.3411	1.3372	1.3605	1.3933	1.3375
740	1.3372	1.3421	1.3421	1.3582	1.4026	1.3411	1.3372	1.3605	1.3933	1.3375
739	1.3373	1.3421	1.3422	1.3582	1.4026	1.34113	1.3373	1.3606	1.3934	1.3376
738	1.3373	1.3422	1.3422	1.3582	1.4026	1.3412	1.3373	1.3606	1.3934	1.3376
737	1.3373	1.3422	1.3422	1.3582	1.4026	1.3412	1.3373	1.3606	1.3934	1.3376
736	1.3373	1.3422	1.3422	1.3582	1.4026	1.3412	1.3373	1.3606	1.3934	1.3376
735	1.3373	1.3422	1.3422	1.3582	1.4026	1.3412	1.3373	1.3606	1.3934	1.3376
734	1.3373	1.3422	1.3422	1.3582	1.4026	1.3412	1.3373	1.3606	1.3934	1.3376
733	1.3373	1.3422	1.3422	1.3582	1.4026	1.3412	1.3373	1.3606	1.3934	1.3376
732	1.3373	1.3422	1.3422	1.3582	1.4026	1.3412	1.3373	1.3606	1.3934	1.3376
731	1.3373	1.3422	1.3422	1.3582	1.4026	1.3412	1.3373	1.3606	1.3934	1.3376
730	1.3373	1.3422	1.3422	1.3582	1.4026	1.3412	1.3373	1.3606	1.3934	1.3376
729	1.3373	1.3422	1.3422	1.35819	1.4026	1.3412	1.3373	1.3606	1.3934	1.3376
728	1.3373	1.3422	1.3422	1.3583	1.4026	1.3412	1.3373	1.3606	1.3934	1.3376
727	1.3373	1.3422	1.3422	1.3583	1.4026	1.3412	1.3373	1.3606	1.3934	1.3376
726	1.3373	1.3422	1.3422	1.3583	1.4027	1.3412	1.3373	1.3606	1.3934	1.3376
725	1.3373	1.3422	1.3422	1.3583	1.4027	1.3412	1.3373	1.3606	1.3934	1.3376
724	1.33741	1.34219	1.34231	1.3583	1.4027	1.34119	1.33741	1.36071	1.39351	1.33771
723	1.3374	1.3423	1.3423	1.3583	1.4027	1.3413	1.3374	1.3607	1.3935	1.3377
722	1.3374	1.3423	1.3423	1.3583	1.4027	1.3413	1.3374	1.3607	1.3935	1.3377
721	1.3374	1.3423	1.3423	1.3583	1.4027	1.3413	1.3374	1.3607	1.3935	1.3377
720	1.3374	1.3423	1.3423	1.3583	1.4027	1.3413	1.3374	1.3607	1.3935	1.3377
719	1.3374	1.3423	1.3423	1.3583	1.4027	1.3413	1.3374	1.3607	1.3935	1.3377
718	1.3374	1.3423	1.3423	1.3583	1.4027	1.3413	1.3374	1.3607	1.3935	1.3377
717	1.3374	1.3423	1.3423	1.3583	1.4027	1.3413	1.3374	1.3607	1.3935	1.3377
716	1.3374	1.3423	1.3423	1.3583	1.4027	1.3413	1.3374	1.3607	1.3935	1.3377
715	1.3374	1.3423	1.3423	1.3583	1.4027	1.3413	1.3374	1.3607	1.3935	1.3377
714	1.3374	1.3423	1.3423	1.3583	1.4027	1.3413	1.3374	1.3607	1.3935	1.3377
713	1.3374	1.3423	1.3423	1.3583	1.4027	1.3413	1.3374	1.3607	1.3935	1.3377
712	1.3374	1.3423	1.3423	1.3584	1.4027	1.3413	1.3374	1.3607	1.3935	1.3377
711	1.3374	1.3423	1.3423	1.3584	1.4027	1.3413	1.3374	1.3607	1.3935	1.3377
710	1.3374	1.3423	1.3423	1.3584	1.4027	1.3413	1.3374	1.3607	1.3935	1.3377
709	1.33739	1.3423	1.3423	1.3584	1.4027	1.3413	1.33739	1.36069	1.39349	1.3377
708	1.3375	1.34239	1.3424	1.3584	1.4027	1.3414	1.3375	1.3608	1.3936	1.3378
707	1.3375	1.3424	1.3424	1.3584	1.40269	1.3414	1.3375	1.3608	1.3936	1.3378
706	1.3375	1.3424	1.3424	1.3584	1.4028	1.3414	1.3375	1.3608	1.3936	1.3378
705	1.3375	1.3424	1.3424	1.3584	1.4028	1.3414	1.3375	1.3608	1.3936	1.3378
704	1.3375	1.3424	1.3424	1.3584	1.4028	1.3414	1.3375	1.3608	1.3936	1.3378
703	1.3375	1.3424	1.3424	1.3584	1.4028	1.3414	1.3375	1.3608	1.3936	1.3378
702	1.3375	1.3424	1.3424	1.3584	1.4028	1.3414	1.3375	1.3608	1.3936	1.3378
701	1.3375	1.3424	1.3424	1.3584	1.4028	1.3414	1.3375	1.3608	1.3936	1.3378
700	1.3375	1.3424	1.3424	1.3584	1.4028	1.3414	1.3375	1.3608	1.3936	1.3378
699	1.3375	1.3424	1.3424	1.3584	1.4028	1.3414	1.3375	1.3608	1.3936	1.3378
698	1.3375	1.3424	1.3424	1.3584	1.4028	1.3414	1.3375	1.3608	1.3936	1.3378
697	1.3375	1.3424	1.3424	1.3584	1.4028	1.3414	1.3375	1.3608	1.3936	1.3378
696	1.3375	1.3424	1.3424	1.35839	1.4028	1.3414	1.3375	1.3608	1.3936	1.3378
695	1.3375	1.3424	1.3424	1.3585	1.4028	1.3414	1.3375	1.3608	1.3936	1.3378
694	1.3375	1.3424	1.3424	1.3585	1.4028	1.3414	1.3375	1.3608	1.3936	1.3378
693	1.3375	1.3424	1.3424	1.3585	1.4028	1.3414	1.3375	1.3608	1.3936	1.3378
692	1.3376	1.34251	1.3425	1.3585	1.4028	1.3415	1.3376	1.3609	1.3937	1.3379
691	1.3376	1.3425	1.3425	1.3585	1.4028	1.3415	1.3376	1.3609	1.3937	1.3379
690	1.3376	1.3425	1.3425	1.3585	1.4028	1.3415	1.3376	1.3609	1.3937	1.3379
689	1.3376	1.3425	1.3425	1.3585	1.4028	1.3415	1.3376	1.3609	1.3937	1.3379
688	1.3376	1.3425	1.3425	1.3585	1.4028	1.3415	1.3376	1.3609	1.3937	1.3379
687	1.3376	1.3425	1.3425	1.3585	1.4028	1.3415	1.3376	1.3609	1.3937	1.3379
686	1.3376	1.3425	1.3425	1.3585	1.4029	1.3415	1.3376	1.3609	1.3937	1.3379
685	1.3376	1.3425	1.3425	1.3585	1.4029	1.3415	1.3376	1.3609	1.3937	1.3379
684	1.3376	1.3425	1.3425	1.3585	1.4029	1.3415	1.3376	1.3609	1.3937	1.3379
683	1.3376	1.3425	1.3425	1.3585	1.4029	1.3415	1.3376	1.3609	1.3937	1.3379
682	1.3376	1.3425	1.3425	1.3585	1.4029	1.3415	1.3376	1.3609	1.3937	1.3379
681	1.3376	1.3425	1.3425	1.3585	1.4029	1.3415	1.3376	1.3609	1.3937	1.3379
680	1.3376	1.3425	1.3425	1.3585	1.4029	1.3415	1.3376	1.3609	1.3937	1.3379
679	1.3376	1.3425	1.3425	1.3585	1.4029	1.3415	1.3376	1.3609	1.3937	1.3379
678	1.3376	1.3425	1.3425	1.3586	1.4029	1.3415	1.3376	1.3609	1.3937	1.3379
677	1.3376	1.3425	1.3425	1.3586	1.4029	1.3415	1.3376	1.3609	1.3937	1.3379
676	1.3377	1.34249	1.3426	1.3586	1.4029	1.34156	1.3377	1.361	1.3938	1.338
675	1.3377	1.3426	1.3426	1.3586	1.4029	1.3416	1.3377	1.361	1.3938	1.338
674	1.3377	1.3426	1.3426	1.3586	1.4029	1.3416	1.3377	1.361	1.3938	1.338
673	1.3377	1.3426	1.3426	1.3586	1.4029	1.3416	1.3377	1.361	1.3938	1.338
672	1.3377	1.3426	1.3426	1.3586	1.4029	1.3416	1.3377	1.361	1.3938	1.338
671	1.3377	1.3426	1.3426	1.3586	1.4029	1.3416	1.3377	1.361	1.3938	1.338
670	1.3377	1.3426	1.3426	1.3586	1.4029	1.3416	1.3377	1.361	1.3938	1.338
669	1.3377	1.3426	1.3426	1.3586	1.4029	1.3416	1.3377	1.361	1.3938	1.338
668	1.3377	1.3426	1.3426	1.3586	1.4029	1.3416	1.3377	1.361	1.3938	1.338
667	1.3377	1.3426	1.3426	1.3586	1.4029	1.3416	1.3377	1.361	1.3938	1.338
666	1.3377	1.3426	1.3426	1.3586	1.4029	1.3416	1.3377	1.361	1.3938	1.338
665	1.3377	1.3426	1.3426	1.3586	1.403	1.3416	1.3377	1.361	1.3938	1.338
664	1.3377	1.3426	1.3426	1.3586	1.403	1.3416	1.3377	1.361	1.3938	1.338
663	1.3377	1.3426	1.3426	1.3586	1.403	1.3416	1.3377	1.361	1.3938	1.338
662	1.3377	1.3426	1.3426	1.3586	1.403	1.3416	1.3377	1.361	1.3938	1.338
661	1.3377	1.3426	1.3426	1.35859	1.403	1.3416	1.3377	1.361	1.3938	1.338
660	1.3377	1.3426	1.3426	1.3587	1.403	1.3416	1.3377	1.361	1.3938	1.338
659	1.3378	1.34259	1.3427	1.3587	1.403	1.34169	1.3378	1.3611	1.3939	1.3381
658	1.3378	1.3427	1.3427	1.3587	1.403	1.3417	1.3378	1.3611	1.3939	1.3381
657	1.3378	1.3427	1.3427	1.3587	1.403	1.3417	1.3378	1.3611	1.3939	1.3381
656	1.3378	1.3427	1.3427	1.3587	1.403	1.3417	1.3378	1.3611	1.3939	1.3381
655	1.3378	1.3427	1.3427	1.3587	1.403	1.3417	1.3378	1.3611	1.3939	1.3381
654	1.3378	1.3427	1.3427	1.3587	1.403	1.3417	1.3378	1.3611	1.3939	1.3381
653	1.3378	1.3427	1.3427	1.3587	1.403	1.3417	1.3378	1.3611	1.3939	1.3381
652	1.3378	1.3427	1.3427	1.3587	1.403	1.3417	1.3378	1.3611	1.3939	1.3381
651	1.3378	1.3427	1.3427	1.3587	1.403	1.3417	1.3378	1.3611	1.3939	1.3381
650	1.3378	1.3427	1.3427	1.3587	1.403	1.3417	1.3378	1.3611	1.3939	1.3381
649	1.3378	1.3427	1.3427	1.3587	1.403	1.3417	1.3378	1.3611	1.3939	1.3381
648	1.3378	1.3427	1.3427	1.3587	1.403	1.3417	1.3378	1.3611	1.3939	1.3381
647	1.3378	1.3427	1.3427	1.3587	1.403	1.3417	1.3378	1.3611	1.3939	1.3381
646	1.3378	1.3427	1.3427	1.3587	1.403	1.3417	1.3378	1.3611	1.3939	1.3381
645	1.3378	1.3427	1.3427	1.3587	1.403	1.3417	1.3378	1.3611	1.3939	1.3381
644	1.3378	1.3427	1.3427	1.3587	1.4031	1.3417	1.3378	1.3611	1.3939	1.3381
643	1.3378	1.3427	1.3427	1.3587	1.4031	1.3417	1.3378	1.3611	1.3939	1.3381
642	1.33791	1.3427	1.34281	1.3588	1.4031	1.3417	1.33791	1.36121	1.39401	1.33821
641	1.3379	1.3428	1.3428	1.3588	1.4031	1.3418	1.3379	1.3612	1.394	1.3382
640	1.3379	1.3428	1.3428	1.3588	1.4031	1.3418	1.3379	1.3612	1.394	1.3382
639	1.3379	1.3428	1.3428	1.3588	1.4031	1.3418	1.3379	1.3612	1.394	1.3382
638	1.3379	1.3428	1.3428	1.3588	1.4031	1.3418	1.3379	1.3612	1.394	1.3382
637	1.3379	1.3428	1.3428	1.3588	1.4031	1.3418	1.3379	1.3612	1.394	1.3382
636	1.3379	1.3428	1.3428	1.3588	1.4031	1.3418	1.3379	1.3612	1.394	1.3382
635	1.3379	1.3428	1.3428	1.3588	1.4031	1.3418	1.3379	1.3612	1.394	1.3382
634	1.3379	1.3428	1.3428	1.3588	1.4031	1.3418	1.3379	1.3612	1.394	1.3382
633	1.3379	1.3428	1.3428	1.3588	1.4031	1.3418	1.3379	1.3612	1.394	1.3382
632	1.3379	1.3428	1.3428	1.3588	1.4031	1.3418	1.3379	1.3612	1.394	1.3382
631	1.3379	1.3428	1.3428	1.3588	1.4031	1.3418	1.3379	1.3612	1.394	1.3382
630	1.3379	1.3428	1.3428	1.3588	1.4031	1.3418	1.3379	1.3612	1.394	1.3382
629	1.3379	1.3428	1.3428	1.3588	1.4031	1.3418	1.3379	1.3612	1.394	1.3382
628	1.3379	1.3428	1.3428	1.3588	1.4031	1.3418	1.3379	1.3612	1.394	1.3382
627	1.3379	1.3428	1.3428	1.3588	1.4031	1.3418	1.3379	1.3612	1.394	1.3382
626	1.3379	1.3428	1.3428	1.3588	1.4031	1.3418	1.3379	1.3612	1.394	1.3382
625	1.3379	1.3428	1.3428	1.3588	1.4031	1.3418	1.3379	1.3612	1.394	1.3382
624	1.338	1.3428	1.3429	1.3588	1.4031	1.3418	1.338	1.3613	1.3941	1.3383
623	1.338	1.3429	1.3429	1.3589	1.4031	1.3419	1.338	1.3613	1.3941	1.3383
622	1.338	1.3429	1.3429	1.3589	1.40314	1.3419	1.338	1.3613	1.3941	1.3383
621	1.338	1.3429	1.3429	1.3589	1.4032	1.3419	1.338	1.3613	1.3941	1.3383
620	1.338	1.3429	1.3429	1.3589	1.4032	1.3419	1.338	1.3613	1.3941	1.3383
619	1.338	1.3429	1.3429	1.3589	1.4032	1.3419	1.338	1.3613	1.3941	1.3383
618	1.338	1.3429	1.3429	1.3589	1.4032	1.3419	1.338	1.3613	1.3941	1.3383
617	1.338	1.3429	1.3429	1.3589	1.4032	1.3419	1.338	1.3613	1.3941	1.3383
616	1.338	1.3429	1.3429	1.3589	1.4032	1.3419	1.338	1.3613	1.3941	1.3383
615	1.338	1.3429	1.3429	1.3589	1.4032	1.3419	1.338	1.3613	1.3941	1.3383
614	1.338	1.3429	1.3429	1.3589	1.4032	1.3419	1.338	1.3613	1.3941	1.3383
613	1.338	1.3429	1.3429	1.3589	1.4032	1.3419	1.338	1.3613	1.3941	1.3383
612	1.338	1.3429	1.3429	1.3589	1.4032	1.3419	1.338	1.3613	1.3941	1.3383
611	1.338	1.3429	1.3429	1.3589	1.4032	1.3419	1.338	1.3613	1.3941	1.3383
610	1.338	1.3429	1.3429	1.3589	1.4032	1.3419	1.338	1.3613	1.3941	1.3383
609	1.338	1.3429	1.3429	1.3589	1.4032	1.3419	1.338	1.3613	1.3941	1.3383
608	1.338	1.3429	1.3429	1.3589	1.4032	1.3419	1.338	1.3613	1.3941	1.3383
607	1.338	1.3429	1.3429	1.3589	1.4032	1.3419	1.338	1.3613	1.3941	1.3383
606	1.338	1.3429	1.3429	1.3589	1.4032	1.3419	1.338	1.3613	1.3941	1.3383
605	1.3381	1.343	1.343	1.3589	1.4032	1.34198	1.3381	1.3614	1.3942	1.3384
604	1.3381	1.343	1.343	1.35901	1.4032	1.342	1.3381	1.3614	1.3942	1.3384
603	1.3381	1.343	1.343	1.359	1.4032	1.342	1.3381	1.3614	1.3942	1.3384
602	1.3381	1.343	1.343	1.359	1.4032	1.342	1.3381	1.3614	1.3942	1.3384
601	1.3381	1.343	1.343	1.359	1.4032	1.342	1.3381	1.3614	1.3942	1.3384
600	1.3381	1.343	1.343	1.359	1.4032	1.342	1.3381	1.3614	1.3942	1.3384
599	1.3381	1.343	1.343	1.359	1.4032	1.342	1.3381	1.3614	1.3942	1.3384
598	1.3381	1.343	1.343	1.359	1.4033	1.342	1.3381	1.3614	1.3942	1.3384
597	1.3381	1.343	1.343	1.359	1.4033	1.342	1.3381	1.3614	1.3942	1.3384
596	1.3381	1.343	1.343	1.359	1.4033	1.342	1.3381	1.3614	1.3942	1.3384
595	1.3381	1.343	1.343	1.359	1.4033	1.342	1.3381	1.3614	1.3942	1.3384
594	1.3381	1.343	1.343	1.359	1.4033	1.342	1.3381	1.3614	1.3942	1.3384
593	1.3381	1.343	1.343	1.359	1.4033	1.342	1.3381	1.3614	1.3942	1.3384
592	1.3381	1.343	1.343	1.359	1.4033	1.342	1.3381	1.3614	1.3942	1.3384
591	1.3381	1.343	1.343	1.359	1.4033	1.342	1.3381	1.3614	1.3942	1.3384
590	1.3381	1.343	1.343	1.359	1.4033	1.342	1.3381	1.3614	1.3942	1.3384
589	1.3381	1.343	1.343	1.359	1.4033	1.342	1.3381	1.3614	1.3942	1.3384
588	1.3381	1.343	1.343	1.359	1.4033	1.342	1.3381	1.3614	1.3942	1.3384
587	1.3381	1.343	1.343	1.359	1.4033	1.342	1.3381	1.3614	1.3942	1.3384
586	1.3382	1.343	1.3431	1.359	1.4033	1.342	1.3382	1.3615	1.3943	1.3385
585	1.3382	1.3431	1.3431	1.359	1.4033	1.3421	1.3382	1.3615	1.3943	1.3385
584	1.3382	1.3431	1.3431	1.35907	1.4033	1.3421	1.3382	1.3615	1.3943	1.3385
583	1.3382	1.3431	1.3431	1.3591	1.4033	1.3421	1.3382	1.3615	1.3943	1.3385
582	1.3382	1.3431	1.3431	1.3591	1.4033	1.3421	1.3382	1.3615	1.3943	1.3385
581	1.3382	1.3431	1.3431	1.3591	1.4033	1.3421	1.3382	1.3615	1.3943	1.3385
580	1.3382	1.3431	1.3431	1.3591	1.4033	1.3421	1.3382	1.3615	1.3943	1.3385
579	1.3382	1.3431	1.3431	1.3591	1.4033	1.3421	1.3382	1.3615	1.3943	1.3385
578	1.3382	1.3431	1.3431	1.3591	1.4033	1.3421	1.3382	1.3615	1.3943	1.3385
577	1.3382	1.3431	1.3431	1.3591	1.4033	1.3421	1.3382	1.3615	1.3943	1.3385
576	1.3382	1.3431	1.3431	1.3591	1.4033	1.3421	1.3382	1.3615	1.3943	1.3385
575	1.3382	1.3431	1.3431	1.3591	1.4033	1.3421	1.3382	1.3615	1.3943	1.3385
574	1.3382	1.3431	1.3431	1.3591	1.40341	1.3421	1.3382	1.3615	1.3943	1.3385
573	1.3382	1.3431	1.3431	1.3591	1.4034	1.3421	1.3382	1.3615	1.3943	1.3385
572	1.3382	1.3431	1.3431	1.3591	1.4034	1.3421	1.3382	1.3615	1.3943	1.3385
571	1.3382	1.3431	1.3431	1.3591	1.4034	1.3421	1.3382	1.3615	1.3943	1.3385
570	1.3382	1.3431	1.3431	1.3591	1.4034	1.3421	1.3382	1.3615	1.3943	1.3385
569	1.3382	1.3431	1.3431	1.3591	1.4034	1.3421	1.3382	1.3615	1.3943	1.3385
568	1.3382	1.3431	1.3431	1.3591	1.4034	1.3421	1.3382	1.3615	1.3943	1.3385
567	1.3382	1.3431	1.3431	1.3591	1.4034	1.3421	1.3382	1.3615	1.3943	1.3385
566	1.3383	1.34316	1.3432	1.3591	1.4034	1.34209	1.3383	1.3616	1.3944	1.3386
565	1.3383	1.3432	1.3432	1.3591	1.4034	1.3422	1.3383	1.3616	1.3944	1.3386
564	1.3383	1.3432	1.3432	1.3591	1.4034	1.3422	1.3383	1.3616	1.3944	1.3386
563	1.3383	1.3432	1.3432	1.35909	1.4034	1.3422	1.3383	1.3616	1.3944	1.3386
562	1.3383	1.3432	1.3432	1.3592	1.4034	1.3422	1.3383	1.3616	1.3944	1.3386
561	1.3383	1.3432	1.3432	1.3592	1.4034	1.3422	1.3383	1.3616	1.3944	1.3386
560	1.3383	1.3432	1.3432	1.3592	1.4034	1.3422	1.3383	1.3616	1.3944	1.3386
559	1.3383	1.3432	1.3432	1.3592	1.4034	1.3422	1.3383	1.3616	1.3944	1.3386
558	1.3383	1.3432	1.3432	1.3592	1.4034	1.3422	1.3383	1.3616	1.3944	1.3386
557	1.3383	1.3432	1.3432	1.3592	1.4034	1.3422	1.3383	1.3616	1.3944	1.3386
556	1.3383	1.3432	1.3432	1.3592	1.4034	1.3422	1.3383	1.3616	1.3944	1.3386
555	1.3383	1.3432	1.3432	1.3592	1.4034	1.3422	1.3383	1.3616	1.3944	1.3386
554	1.3383	1.3432	1.3432	1.3592	1.4034	1.3422	1.3383	1.3616	1.3944	1.3386
553	1.3383	1.3432	1.3432	1.3592	1.4034	1.3422	1.3383	1.3616	1.3944	1.3386
552	1.3383	1.3432	1.3432	1.3592	1.4034	1.3422	1.3383	1.3616	1.3944	1.3386
551	1.3383	1.3432	1.3432	1.3592	1.4034	1.3422	1.3383	1.3616	1.3944	1.3386
550	1.3383	1.3432	1.3432	1.3592	1.4034	1.3422	1.3383	1.3616	1.3944	1.3386
549	1.3383	1.3432	1.3432	1.3592	1.4034	1.3422	1.3383	1.3616	1.3944	1.3386
548	1.3383	1.3432	1.3432	1.3592	1.4035	1.3422	1.3383	1.3616	1.3944	1.3386
547	1.3383	1.3432	1.3432	1.3592	1.4035	1.3422	1.3383	1.3616	1.3944	1.3386
546	1.3383	1.3432	1.3432	1.3592	1.4035	1.3422	1.3383	1.3616	1.3944	1.3386
545	1.3384	1.3433	1.3433	1.3592	1.4035	1.3423	1.3384	1.3617	1.3945	1.3387
544	1.3384	1.3433	1.3433	1.3592	1.4035	1.3423	1.3384	1.3617	1.3945	1.3387
543	1.3384	1.3433	1.3433	1.3592	1.4035	1.3423	1.3384	1.3617	1.3945	1.3387
542	1.3384	1.3433	1.3433	1.3592	1.4035	1.3423	1.3384	1.3617	1.3945	1.3387
541	1.3384	1.3433	1.3433	1.3592	1.4035	1.3423	1.3384	1.3617	1.3945	1.3387
540	1.3384	1.3433	1.3433	1.3593	1.4035	1.3423	1.3384	1.3617	1.3945	1.3387
539	1.3384	1.3433	1.3433	1.3593	1.4035	1.3423	1.3384	1.3617	1.3945	1.3387
538	1.3384	1.3433	1.3433	1.3593	1.4035	1.3423	1.3384	1.3617	1.3945	1.3387
537	1.3384	1.3433	1.3433	1.3593	1.4035	1.3423	1.3384	1.3617	1.3945	1.3387
536	1.3384	1.3433	1.3433	1.3593	1.4035	1.3423	1.3384	1.3617	1.3945	1.3387
535	1.3384	1.3433	1.3433	1.3593	1.4035	1.3423	1.3384	1.3617	1.3945	1.3387
534	1.3384	1.3433	1.3433	1.3593	1.4035	1.3423	1.3384	1.3617	1.3945	1.3387
533	1.3384	1.3433	1.3433	1.3593	1.4035	1.3423	1.3384	1.3617	1.3945	1.3387
532	1.3384	1.3433	1.3433	1.3593	1.4035	1.3423	1.3384	1.3617	1.3945	1.3387
531	1.3384	1.3433	1.3433	1.3593	1.4035	1.3423	1.3384	1.3617	1.3945	1.3387
530	1.3384	1.3433	1.3433	1.3593	1.4035	1.3423	1.3384	1.3617	1.3945	1.3387
529	1.3384	1.3433	1.3433	1.3593	1.4035	1.3423	1.3384	1.3617	1.3945	1.3387
528	1.3384	1.3433	1.3433	1.3593	1.4035	1.3423	1.3384	1.3617	1.3945	1.3387
527	1.3384	1.3433	1.3433	1.3593	1.4035	1.3423	1.3384	1.3617	1.3945	1.3387
526	1.3384	1.3433	1.3433	1.3593	1.4035	1.3423	1.3384	1.3617	1.3945	1.3387
525	1.3384	1.3433	1.3433	1.3593	1.4035	1.3423	1.3384	1.3617	1.3945	1.3387
524	1.3385	1.3433	1.3434	1.3593	1.4035	1.3423	1.3385	1.3618	1.3946	1.3388
523	1.3385	1.3434	1.3434	1.3593	1.4035	1.3424	1.3385	1.3618	1.3946	1.3388
522	1.3385	1.3434	1.3434	1.3593	1.4035	1.3424	1.3385	1.3618	1.3946	1.3388
521	1.3385	1.3434	1.3434	1.3593	1.4036	1.3424	1.3385	1.3618	1.3946	1.3388
520	1.3385	1.3434	1.3434	1.3593	1.4036	1.3424	1.3385	1.3618	1.3946	1.3388
519	1.3385	1.3434	1.3434	1.3593	1.4036	1.3424	1.3385	1.3618	1.3946	1.3388
518	1.3385	1.3434	1.3434	1.3593	1.4036	1.3424	1.3385	1.3618	1.3946	1.3388
517	1.3385	1.3434	1.3434	1.3594	1.4036	1.3424	1.3385	1.3618	1.3946	1.3388
516	1.3385	1.3434	1.3434	1.3594	1.4036	1.3424	1.3385	1.3618	1.3946	1.3388
515	1.3385	1.3434	1.3434	1.3594	1.4036	1.3424	1.3385	1.3618	1.3946	1.3388
514	1.3385	1.3434	1.3434	1.3594	1.4036	1.3424	1.3385	1.3618	1.3946	1.3388
513	1.3385	1.3434	1.3434	1.3594	1.4036	1.3424	1.3385	1.3618	1.3946	1.3388
512	1.3385	1.3434	1.3434	1.3594	1.4036	1.3424	1.3385	1.3618	1.3946	1.3388
511	1.3385	1.3434	1.3434	1.3594	1.4036	1.3424	1.3385	1.3618	1.3946	1.3388
510	1.3385	1.3434	1.3434	1.3594	1.4036	1.3424	1.3385	1.3618	1.3946	1.3388
509	1.3385	1.3434	1.3434	1.3594	1.4036	1.3424	1.3385	1.3618	1.3946	1.3388
508	1.3385	1.3434	1.3434	1.3594	1.4036	1.3424	1.3385	1.3618	1.3946	1.3388
507	1.3385	1.3434	1.3434	1.3594	1.4036	1.3424	1.3385	1.3618	1.3946	1.3388
506	1.3385	1.3434	1.3434	1.3594	1.4036	1.3424	1.3385	1.3618	1.3946	1.3388
505	1.3385	1.3434	1.3434	1.3594	1.4036	1.3424	1.3385	1.3618	1.3946	1.3388
504	1.3385	1.3434	1.3434	1.3594	1.4036	1.3424	1.3385	1.3618	1.3946	1.3388
503	1.3385	1.3434	1.3434	1.3594	1.4036	1.3424	1.3385	1.3618	1.3946	1.3388
502	1.3385	1.3434	1.3434	1.3594	1.4036	1.3424	1.3385	1.3618	1.3946	1.3388
501	1.3386	1.3435	1.3435	1.3594	1.4036	1.3424	1.3386	1.3619	1.3947	1.3389
500	1.3386	1.3435	1.3435	1.3594	1.4036	1.3425	1.3386	1.3619	1.3947	1.3389
499	1.3386	1.3435	1.3435	1.3594	1.4036	1.3425	1.3386	1.3619	1.3947	1.3389
498	1.3386	1.3435	1.3435	1.3594	1.4036	1.3425	1.3386	1.3619	1.3947	1.3389
497	1.3386	1.3435	1.3435	1.3594	1.4036	1.3425	1.3386	1.3619	1.3947	1.3389
496	1.3386	1.3435	1.3435	1.3594	1.4036	1.3425	1.3386	1.3619	1.3947	1.3389
495	1.3386	1.3435	1.3435	1.3594	1.4036	1.3425	1.3386	1.3619	1.3947	1.3389
494	1.3386	1.3435	1.3435	1.3594	1.4036	1.3425	1.3386	1.3619	1.3947	1.3389
493	1.3386	1.3435	1.3435	1.3595	1.4036	1.3425	1.3386	1.3619	1.3947	1.3389
492	1.3386	1.3435	1.3435	1.3595	1.4037	1.3425	1.3386	1.3619	1.3947	1.3389
491	1.3386	1.3435	1.3435	1.3595	1.4037	1.3425	1.3386	1.3619	1.3947	1.3389
490	1.3386	1.3435	1.3435	1.3595	1.4037	1.3425	1.3386	1.3619	1.3947	1.3389
489	1.3386	1.3435	1.3435	1.3595	1.4037	1.3425	1.3386	1.3619	1.3947	1.3389
488	1.3386	1.3435	1.3435	1.3595	1.4037	1.3425	1.3386	1.3619	1.3947	1.3389
487	1.3386	1.3435	1.3435	1.3595	1.4037	1.3425	1.3386	1.3619	1.3947	1.3389
486	1.3386	1.3435	1.3435	1.3595	1.4037	1.3425	1.3386	1.3619	1.3947	1.3389
485	1.3386	1.3435	1.3435	1.3595	1.4037	1.3425	1.3386	1.3619	1.3947	1.3389
484	1.3386	1.3435	1.3435	1.3595	1.4037	1.3425	1.3386	1.3619	1.3947	1.3389
483	1.3386	1.3435	1.3435	1.3595	1.4037	1.3425	1.3386	1.3619	1.3947	1.3389
482	1.3386	1.3435	1.3435	1.3595	1.4037	1.3425	1.3386	1.3619	1.3947	1.3389
481	1.3386	1.3435	1.3435	1.3595	1.4037	1.3425	1.3386	1.3619	1.3947	1.3389
480	1.3386	1.3435	1.3435	1.3595	1.4037	1.3425	1.3386	1.3619	1.3947	1.3389
479	1.3386	1.3435	1.3435	1.3595	1.4037	1.3425	1.3386	1.3619	1.3947	1.3389
478	1.3386	1.3435	1.3435	1.3595	1.4037	1.3425	1.3386	1.3619	1.3947	1.339
477	1.3387	1.3436	1.3436	1.3595	1.4037	1.3425	1.3387	1.362	1.3948	1.339
476	1.3387	1.3436	1.3436	1.3595	1.4037	1.3426	1.3387	1.362	1.3948	1.339
475	1.3387	1.3436	1.3436	1.3595	1.4037	1.3426	1.3387	1.362	1.3948	1.339
474	1.3387	1.3436	1.3436	1.3595	1.4037	1.3426	1.3387	1.362	1.3948	1.339
473	1.3387	1.3436	1.3436	1.3595	1.4037	1.3426	1.3387	1.362	1.3948	1.339
472	1.3387	1.3436	1.3436	1.3595	1.4037	1.3426	1.3387	1.362	1.3948	1.339
471	1.3387	1.3436	1.3436	1.3595	1.4037	1.3426	1.3387	1.362	1.3948	1.339
470	1.3387	1.3436	1.3436	1.3595	1.4037	1.3426	1.3387	1.362	1.3948	1.339
469	1.3387	1.3436	1.3436	1.3595	1.4037	1.3426	1.3387	1.362	1.3948	1.339
468	1.3387	1.3436	1.3436	1.3595	1.4037	1.3426	1.3387	1.362	1.3948	1.339
467	1.3387	1.3436	1.3436	1.3596	1.4037	1.3426	1.3387	1.362	1.3948	1.339
466	1.3387	1.3436	1.3436	1.3596	1.4037	1.3426	1.3387	1.362	1.3948	1.339
465	1.3387	1.3436	1.3436	1.3596	1.4037	1.3426	1.3387	1.362	1.3948	1.339
464	1.3387	1.3436	1.3436	1.3596	1.4037	1.3426	1.3387	1.362	1.3948	1.339
463	1.3387	1.3436	1.3436	1.3596	1.4037	1.3426	1.3387	1.362	1.3948	1.339
462	1.3387	1.3436	1.3436	1.3596	1.4038	1.3426	1.3387	1.362	1.3948	1.339
461	1.3387	1.3436	1.3436	1.3596	1.4038	1.3426	1.3387	1.362	1.3948	1.339
460	1.3387	1.3436	1.3436	1.3596	1.4038	1.3426	1.3387	1.362	1.3948	1.339
459	1.3387	1.3436	1.3436	1.3596	1.4038	1.3426	1.3387	1.362	1.3948	1.339
458	1.3387	1.3436	1.3436	1.3596	1.4038	1.3426	1.3387	1.362	1.3948	1.339
457	1.3387	1.3436	1.3436	1.3596	1.4038	1.3426	1.3387	1.362	1.3948	1.339
456	1.3387	1.3436	1.3436	1.3596	1.4038	1.3426	1.3387	1.362	1.3948	1.339
455	1.3387	1.3436	1.3436	1.3596	1.4038	1.3426	1.3387	1.362	1.3948	1.339
454	1.3387	1.3436	1.3436	1.3596	1.4038	1.3426	1.3387	1.362	1.3948	1.339
453	1.3387	1.3436	1.3436	1.3596	1.4038	1.3426	1.3387	1.362	1.3948	1.3391
452	1.3388	1.3437	1.3437	1.3596	1.4038	1.3426	1.3388	1.3621	1.3949	1.3391
451	1.3388	1.3437	1.3437	1.3596	1.4038	1.3427	1.3388	1.3621	1.3949	1.3391
450	1.3388	1.3437	1.3437	1.3596	1.4038	1.3427	1.3388	1.3621	1.3949	1.3391
449	1.3388	1.3437	1.3437	1.3596	1.4038	1.3427	1.3388	1.3621	1.3949	1.3391
448	1.3388	1.3437	1.3437	1.3596	1.4038	1.3427	1.3388	1.3621	1.3949	1.3391
447	1.3388	1.3437	1.3437	1.3596	1.4038	1.3427	1.3388	1.3621	1.3949	1.3391
446	1.3388	1.3437	1.3437	1.3596	1.4038	1.3427	1.3388	1.3621	1.3949	1.3391
445	1.3388	1.3437	1.3437	1.3596	1.4038	1.3427	1.3388	1.3621	1.3949	1.3391
444	1.3388	1.3437	1.3437	1.3596	1.4038	1.3427	1.3388	1.3621	1.3949	1.3391
443	1.3388	1.3437	1.3437	1.3596	1.4038	1.3427	1.3388	1.3621	1.3949	1.3391
442	1.3388	1.3437	1.3437	1.3596	1.4038	1.3427	1.3388	1.3621	1.3949	1.3391
441	1.3388	1.3437	1.3437	1.3596	1.4038	1.3427	1.3388	1.3621	1.3949	1.3391
440	1.3388	1.3437	1.3437	1.3597	1.4038	1.3427	1.3388	1.3621	1.3949	1.3391
439	1.3388	1.3437	1.3437	1.3597	1.4038	1.3427	1.3388	1.3621	1.3949	1.3391
438	1.3388	1.3437	1.3437	1.3597	1.4038	1.3427	1.3388	1.3621	1.3949	1.3391
437	1.3388	1.3437	1.3437	1.3597	1.4038	1.3427	1.3388	1.3621	1.3949	1.3391
436	1.3388	1.3437	1.3437	1.3597	1.4038	1.3427	1.3388	1.3621	1.3949	1.3391
435	1.3388	1.3437	1.3437	1.3597	1.4038	1.3427	1.3388	1.3621	1.3949	1.3391
434	1.3388	1.3437	1.3437	1.3597	1.4038	1.3427	1.3388	1.3621	1.3949	1.3391
433	1.3388	1.3437	1.3437	1.3597	1.4038	1.3427	1.3388	1.3621	1.3949	1.3391
432	1.3388	1.3437	1.3437	1.3597	1.4038	1.3427	1.3388	1.3621	1.3949	1.3391
431	1.3388	1.3437	1.3437	1.3597	1.4038	1.3427	1.3388	1.3621	1.3949	1.3391
430	1.3388	1.3437	1.3437	1.3597	1.4038	1.3427	1.3388	1.3621	1.3949	1.3391
429	1.3388	1.3437	1.3437	1.3597	1.4039	1.3427	1.3388	1.3621	1.3949	1.3391
428	1.3388	1.3437	1.3437	1.3597	1.4039	1.3427	1.3388	1.3621	1.3949	1.3391
427	1.3388	1.3437	1.3437	1.3597	1.4039	1.3427	1.3388	1.3621	1.3949	1.3391
426	1.3388	1.3437	1.3437	1.3597	1.4039	1.3427	1.3388	1.3621	1.3949	1.3392
425	1.3389	1.3438	1.3438	1.3597	1.4039	1.3427	1.3389	1.3622	1.395	1.3392
424	1.3389	1.3438	1.3438	1.3597	1.4039	1.3428	1.3389	1.3622	1.395	1.3392
423	1.3389	1.3438	1.3438	1.3597	1.4039	1.3428	1.3389	1.3622	1.395	1.3392
422	1.3389	1.3438	1.3438	1.3597	1.4039	1.3428	1.3389	1.3622	1.395	1.3392
421	1.3389	1.3438	1.3438	1.3597	1.4039	1.3428	1.3389	1.3622	1.395	1.3392
420	1.3389	1.3438	1.3438	1.3597	1.4039	1.3428	1.3389	1.3622	1.395	1.3392
419	1.3389	1.3438	1.3438	1.3597	1.4039	1.3428	1.3389	1.3622	1.395	1.3392
418	1.3389	1.3438	1.3438	1.3597	1.4039	1.3428	1.3389	1.3622	1.395	1.3392
417	1.3389	1.3438	1.3438	1.3597	1.4039	1.3428	1.3389	1.3622	1.395	1.3392
416	1.3389	1.3438	1.3438	1.3597	1.4039	1.3428	1.3389	1.3622	1.395	1.3392
415	1.3389	1.3438	1.3438	1.3597	1.4039	1.3428	1.3389	1.3622	1.395	1.3392
414	1.3389	1.3438	1.3438	1.3597	1.4039	1.3428	1.3389	1.3622	1.395	1.3392
413	1.3389	1.3438	1.3438	1.3597	1.4039	1.3428	1.3389	1.3622	1.395	1.3392
412	1.3389	1.3438	1.3438	1.3597	1.4039	1.3428	1.3389	1.3622	1.395	1.3392
411	1.3389	1.3438	1.3438	1.3598	1.4039	1.3428	1.3389	1.3622	1.395	1.3392
410	1.3389	1.3438	1.3438	1.3598	1.4039	1.3428	1.3389	1.3622	1.395	1.3392
409	1.3389	1.3438	1.3438	1.3598	1.4039	1.3428	1.3389	1.3622	1.395	1.3392
408	1.3389	1.3438	1.3438	1.3598	1.4039	1.3428	1.3389	1.3622	1.395	1.3392
407	1.3389	1.3438	1.3438	1.3598	1.4039	1.3428	1.3389	1.3622	1.395	1.3392
406	1.3389	1.3438	1.3438	1.3598	1.4039	1.3428	1.3389	1.3622	1.395	1.3392
405	1.3389	1.3438	1.3438	1.3598	1.4039	1.3428	1.3389	1.3622	1.395	1.3392
404	1.3389	1.3438	1.3438	1.3598	1.4039	1.3428	1.3389	1.3622	1.395	1.3392
403	1.3389	1.3438	1.3438	1.3598	1.4039	1.3428	1.3389	1.3622	1.395	1.3392
402	1.3389	1.3438	1.3438	1.3598	1.4039	1.3428	1.3389	1.3622	1.395	1.3392
401	1.3389	1.3438	1.3438	1.3598	1.4039	1.3428	1.3389	1.3622	1.395	1.3392
400	1.3389	1.3438	1.3438	1.3598	1.4039	1.3428	1.3389	1.3622	1.395	1.3392
399	1.3389	1.3438	1.3438	1.3598	1.4039	1.3428	1.3389	1.3622	1.395	1.3392
398	1.3389	1.3438	1.3438	1.3598	1.4039	1.3428	1.3389	1.3622	1.395	1.3393
397	1.339	1.34379	1.3438	1.3598	1.4039	1.3428	1.3389	1.3622	1.395	1.3393
396	1.339	1.3439	1.3439	1.3598	1.4039	1.3428	1.339	1.3623	1.3951	1.3393
395	1.339	1.3439	1.3439	1.3598	1.4039	1.3429	1.339	1.3623	1.3951	1.3393
394	1.339	1.3439	1.3439	1.3598	1.4039	1.3429	1.339	1.3623	1.3951	1.3393
393	1.339	1.3439	1.3439	1.3598	1.404	1.3429	1.339	1.3623	1.3951	1.3393
392	1.339	1.3439	1.3439	1.3598	1.404	1.3429	1.339	1.3623	1.3951	1.3393
391	1.339	1.3439	1.3439	1.3598	1.404	1.3429	1.339	1.3623	1.3951	1.3393
390	1.339	1.3439	1.3439	1.3598	1.404	1.3429	1.339	1.3623	1.3951	1.3393
389	1.339	1.3439	1.3439	1.3598	1.404	1.3429	1.339	1.3623	1.3951	1.3393
388	1.339	1.3439	1.3439	1.3598	1.404	1.3429	1.339	1.3623	1.3951	1.3393
387	1.339	1.3439	1.3439	1.3598	1.404	1.3429	1.339	1.3623	1.3951	1.3393
386	1.339	1.3439	1.3439	1.3598	1.404	1.3429	1.339	1.3623	1.3951	1.3393
385	1.339	1.3439	1.3439	1.3598	1.404	1.3429	1.339	1.3623	1.3951	1.3393
384	1.339	1.3439	1.3439	1.3598	1.404	1.3429	1.339	1.3623	1.3951	1.3393
383	1.339	1.3439	1.3439	1.3598	1.404	1.3429	1.339	1.3623	1.3951	1.3393
382	1.339	1.3439	1.3439	1.3598	1.404	1.3429	1.339	1.3623	1.3951	1.3393
381	1.339	1.3439	1.3439	1.3598	1.404	1.3429	1.339	1.3623	1.3951	1.3393
380	1.339	1.3439	1.3439	1.35981	1.404	1.3429	1.339	1.3623	1.3951	1.3393
379	1.339	1.3439	1.3439	1.3599	1.404	1.3429	1.339	1.3623	1.3951	1.3393
378	1.339	1.3439	1.3439	1.3599	1.404	1.3429	1.339	1.3623	1.3951	1.3393
377	1.339	1.3439	1.3439	1.3599	1.404	1.3429	1.339	1.3623	1.3951	1.3393
376	1.339	1.3439	1.3439	1.3599	1.404	1.3429	1.339	1.3623	1.3951	1.3393
375	1.339	1.3439	1.3439	1.3599	1.404	1.3429	1.339	1.3623	1.3951	1.3393
374	1.339	1.3439	1.3439	1.3599	1.404	1.3429	1.339	1.3623	1.3951	1.3393
373	1.339	1.3439	1.3439	1.3599	1.404	1.3429	1.339	1.3623	1.3951	1.3393
372	1.339	1.3439	1.3439	1.3599	1.404	1.3429	1.339	1.3623	1.3951	1.3393
371	1.339	1.3439	1.3439	1.3599	1.404	1.3429	1.339	1.3623	1.3951	1.3393
370	1.339	1.3439	1.3439	1.3599	1.404	1.3429	1.339	1.3623	1.3951	1.3394
369	1.339	1.3439	1.3439	1.3599	1.404	1.3429	1.339	1.3623	1.3951	1.3394
368	1.339	1.3439	1.3439	1.3599	1.404	1.3429	1.339	1.3623	1.3951	1.3394
367	1.339	1.3439	1.3439	1.3599	1.404	1.3429	1.339	1.3623	1.3951	1.3394
366	1.3391	1.344	1.3439	1.3599	1.404	1.3429	1.339	1.3623	1.3951	1.3394
365	1.3391	1.344	1.344	1.3599	1.404	1.3429	1.3391	1.3624	1.3952	1.3394
364	1.3391	1.344	1.344	1.3599	1.404	1.343	1.3391	1.3624	1.3952	1.3394
363	1.3391	1.344	1.344	1.3599	1.404	1.343	1.3391	1.3624	1.3952	1.3394
362	1.3391	1.344	1.344	1.3599	1.404	1.343	1.3391	1.3624	1.3952	1.3394
361	1.3391	1.344	1.344	1.3599	1.404	1.343	1.3391	1.3624	1.3952	1.3394
360	1.3391	1.344	1.344	1.3599	1.404	1.343	1.3391	1.3624	1.3952	1.3394
359	1.3391	1.344	1.344	1.3599	1.404	1.343	1.3391	1.3624	1.3952	1.3394
358	1.3391	1.344	1.344	1.3599	1.404	1.343	1.3391	1.3624	1.3952	1.3394
357	1.3391	1.344	1.344	1.3599	1.404	1.343	1.3391	1.3624	1.3952	1.3394
356	1.3391	1.344	1.344	1.3599	1.404	1.343	1.3391	1.3624	1.3952	1.3394
355	1.3391	1.344	1.344	1.3599	1.404	1.343	1.3391	1.3624	1.3952	1.3394
354	1.3391	1.344	1.344	1.3599	1.404	1.343	1.3391	1.3624	1.3952	1.3394
353	1.3391	1.344	1.344	1.3599	1.4041	1.343	1.3391	1.3624	1.3952	1.3394
352	1.3391	1.344	1.344	1.3599	1.4041	1.343	1.3391	1.3624	1.3952	1.3394
351	1.3391	1.344	1.344	1.3599	1.4041	1.343	1.3391	1.3624	1.3952	1.3394
350	1.3391	1.344	1.344	1.3599	1.4041	1.343	1.3391	1.3624	1.3952	1.3394
349	1.3391	1.344	1.344	1.3599	1.4041	1.343	1.3391	1.3624	1.3952	1.3394
348	1.3391	1.344	1.344	1.3599	1.4041	1.343	1.3391	1.3624	1.3952	1.3394
347	1.3391	1.344	1.344	1.3599	1.4041	1.343	1.3391	1.3624	1.3952	1.3394
346	1.3391	1.344	1.344	1.3599	1.4041	1.343	1.3391	1.3624	1.3952	1.3394
345	1.3391	1.344	1.344	1.36	1.4041	1.343	1.3391	1.3624	1.3952	1.3394
344	1.3391	1.344	1.344	1.36	1.4041	1.343	1.3391	1.3624	1.3952	1.3394
343	1.3391	1.344	1.344	1.36	1.4041	1.343	1.3391	1.3624	1.3952	1.3394
342	1.3391	1.344	1.344	1.36	1.4041	1.343	1.3391	1.3624	1.3952	1.3394
341	1.3391	1.344	1.344	1.36	1.4041	1.343	1.3391	1.3624	1.3952	1.3394
340	1.3391	1.344	1.344	1.36	1.4041	1.343	1.3391	1.3624	1.3952	1.3394
339	1.3391	1.344	1.344	1.36	1.4041	1.343	1.3391	1.3624	1.3952	1.3394
338	1.3391	1.344	1.344	1.36	1.4041	1.343	1.3391	1.3624	1.3952	1.3394
337	1.3391	1.344	1.344	1.36	1.4041	1.343	1.3391	1.3624	1.3952	1.3394
336	1.3391	1.344	1.344	1.36	1.4041	1.343	1.3391	1.3624	1.3952	1.3394
335	1.3391	1.344	1.344	1.36	1.4041	1.343	1.3391	1.3624	1.3952	1.3394
334	1.3391	1.344	1.344	1.36	1.4041	1.343	1.3391	1.3624	1.3952	1.3394
333	1.3391	1.3441	1.344	1.36	1.4041	1.343	1.3391	1.3624	1.3952	1.3395
332	1.3392	1.3441	1.344	1.36	1.4041	1.343	1.3391	1.3624	1.3952	1.3395
331	1.3392	1.3441	1.3441	1.36	1.4041	1.343	1.3392	1.3625	1.3953	1.3395
330	1.3392	1.3441	1.3441	1.36	1.4041	1.3431	1.3392	1.3625	1.3953	1.3395
329	1.3392	1.3441	1.3441	1.36	1.4041	1.3431	1.3392	1.3625	1.3953	1.3395
328	1.3392	1.3441	1.3441	1.36	1.4041	1.3431	1.3392	1.3625	1.3953	1.3395
327	1.3392	1.3441	1.3441	1.36	1.4041	1.3431	1.3392	1.3625	1.3953	1.3395
326	1.3392	1.3441	1.3441	1.36	1.4041	1.3431	1.3392	1.3625	1.3953	1.3395
325	1.3392	1.3441	1.3441	1.36	1.4041	1.3431	1.3392	1.3625	1.3953	1.3395
324	1.3392	1.3441	1.3441	1.36	1.4041	1.3431	1.3392	1.3625	1.3953	1.3395
323	1.3392	1.3441	1.3441	1.36	1.4041	1.3431	1.3392	1.3625	1.3953	1.3395
322	1.3392	1.3441	1.3441	1.36	1.4041	1.3431	1.3392	1.3625	1.3953	1.3395
321	1.3392	1.3441	1.3441	1.36	1.4041	1.3431	1.3392	1.3625	1.3953	1.3395
320	1.3392	1.3441	1.3441	1.36	1.4041	1.3431	1.3392	1.3625	1.3953	1.3395
319	1.3392	1.3441	1.3441	1.36	1.4041	1.3431	1.3392	1.3625	1.3953	1.3395
318	1.3392	1.3441	1.3441	1.36	1.4041	1.3431	1.3392	1.3625	1.3953	1.3395
317	1.3392	1.3441	1.3441	1.36	1.4041	1.3431	1.3392	1.3625	1.3953	1.3395
316	1.3392	1.3441	1.3441	1.36	1.4041	1.3431	1.3392	1.3625	1.3953	1.3395
315	1.3392	1.3441	1.3441	1.36	1.4041	1.3431	1.3392	1.3625	1.3953	1.3395
314	1.3392	1.3441	1.3441	1.36	1.4041	1.3431	1.3392	1.3625	1.3953	1.3395
313	1.3392	1.3441	1.3441	1.36	1.4041	1.3431	1.3392	1.3625	1.3953	1.3395
312	1.3392	1.3441	1.3441	1.36	1.4041	1.3431	1.3392	1.3625	1.3953	1.3395
311	1.3392	1.3441	1.3441	1.36	1.4041	1.3431	1.3392	1.3625	1.3953	1.3395
310	1.3392	1.3441	1.3441	1.36	1.4041	1.3431	1.3392	1.3625	1.3953	1.3395
309	1.3392	1.3441	1.3441	1.36	1.4041	1.3431	1.3392	1.3625	1.3953	1.3395
308	1.3392	1.3441	1.3441	1.36	1.4042	1.3431	1.3392	1.3625	1.3953	1.3395
307	1.3392	1.3441	1.3441	1.3601	1.4042	1.3431	1.3392	1.3625	1.3953	1.3395
306	1.3392	1.3441	1.3441	1.3601	1.4042	1.3431	1.3392	1.3625	1.3953	1.3395
305	1.3392	1.3441	1.3441	1.3601	1.4042	1.3431	1.3392	1.3625	1.3953	1.3395
304	1.3392	1.3441	1.3441	1.3601	1.4042	1.3431	1.3392	1.3625	1.3953	1.3395
303	1.3392	1.3441	1.3441	1.3601	1.4042	1.3431	1.3392	1.3625	1.3953	1.3395
302	1.3392	1.3441	1.3441	1.3601	1.4042	1.3431	1.3392	1.3625	1.3953	1.3395
301	1.3392	1.3441	1.3441	1.3601	1.4042	1.3431	1.3392	1.3625	1.3953	1.3395
300	1.3392	1.3442	1.3441	1.3601	1.4042	1.3431	1.3392	1.3625	1.3953	1.3395
299	1.3392	1.3442	1.3441	1.3601	1.4042	1.3431	1.3392	1.3625	1.3953	1.3395
298	1.3392	1.3442	1.3441	1.3601	1.4042	1.3431	1.3392	1.3625	1.3953	1.3395
297	1.3393	1.3442	1.3441	1.3601	1.4042	1.3431	1.3392	1.3625	1.3953	1.3395
296	1.3393	1.3442	1.3441	1.3601	1.4042	1.3431	1.3392	1.3625	1.3953	1.3395
295	1.3393	1.3442	1.3441	1.3601	1.4042	1.3431	1.3392	1.3625	1.3953	1.3395
294	1.3393	1.3442	1.3441	1.3601	1.4042	1.3431	1.3392	1.3625	1.3953	1.3395
293	1.3393	1.3442	1.3442	1.3601	1.4042	1.3431	1.3393	1.3626	1.3954	1.3395
292	1.3393	1.3442	1.3442	1.3601	1.4042	1.3431	1.3393	1.3626	1.3954	1.3395
291	1.3393	1.3442	1.3442	1.3601	1.4042	1.3432	1.3393	1.3626	1.3954	1.3395
290	1.3393	1.3442	1.3442	1.3601	1.4042	1.3432	1.3393	1.3626	1.3954	1.3395
289	1.3393	1.3442	1.3442	1.3601	1.4042	1.3432	1.3393	1.3626	1.3954	1.3396
288	1.3393	1.3442	1.3442	1.3601	1.4042	1.3432	1.3393	1.3626	1.3954	1.3396
287	1.3393	1.3442	1.3442	1.3601	1.4042	1.3432	1.3393	1.3626	1.3954	1.3396
286	1.3393	1.3442	1.3442	1.3601	1.4042	1.3432	1.3393	1.3626	1.3954	1.3396
285	1.3393	1.3442	1.3442	1.3601	1.4042	1.3432	1.3393	1.3626	1.3954	1.3396
284	1.3393	1.3442	1.3442	1.3601	1.4042	1.3432	1.3393	1.3626	1.3954	1.3396
283	1.3393	1.3442	1.3442	1.3601	1.4042	1.3432	1.3393	1.3626	1.3954	1.3396
282	1.3393	1.3442	1.3442	1.3601	1.4042	1.3432	1.3393	1.3626	1.3954	1.3396
281	1.3393	1.3442	1.3442	1.3601	1.4042	1.3432	1.3393	1.3626	1.3954	1.3396
280	1.3393	1.3442	1.3442	1.3601	1.4042	1.3432	1.3393	1.3626	1.3954	1.3396
279	1.3393	1.3442	1.3442	1.3601	1.4042	1.3432	1.3393	1.3626	1.3954	1.3396
278	1.3393	1.3442	1.3442	1.3601	1.4042	1.3432	1.3393	1.3626	1.3954	1.3396
277	1.3393	1.3442	1.3442	1.3601	1.4042	1.3432	1.3393	1.3626	1.3954	1.3396
276	1.3393	1.3442	1.3442	1.3601	1.4042	1.3432	1.3393	1.3626	1.3954	1.3396
275	1.3393	1.3442	1.3442	1.3601	1.4042	1.3432	1.3393	1.3626	1.3954	1.3396
274	1.3393	1.3442	1.3442	1.3601	1.4042	1.3432	1.3393	1.3626	1.3954	1.3396
273	1.3393	1.3442	1.3442	1.3601	1.4042	1.3432	1.3393	1.3626	1.3954	1.3396
272	1.3393	1.3442	1.3442	1.3601	1.4042	1.3432	1.3393	1.3626	1.3954	1.3396
271	1.3393	1.3442	1.3442	1.3601	1.4042	1.3432	1.3393	1.3626	1.3954	1.3396
270	1.3393	1.3442	1.3442	1.3601	1.4042	1.3432	1.3393	1.3626	1.3954	1.3396
269	1.3393	1.3442	1.3442	1.3601	1.4042	1.3432	1.3393	1.3626	1.3954	1.3396
268	1.3393	1.3442	1.3442	1.3601	1.4042	1.3432	1.3393	1.3626	1.3954	1.3396
267	1.3393	1.3442	1.3442	1.3601	1.4042	1.3432	1.3393	1.3626	1.3954	1.3396
266	1.3393	1.3442	1.3442	1.3601	1.4042	1.3432	1.3393	1.3626	1.3954	1.3396
265	1.3393	1.3442	1.3442	1.3601	1.4042	1.3432	1.3393	1.3626	1.3954	1.3396
264	1.3393	1.3442	1.3442	1.3601	1.4042	1.3432	1.3393	1.3626	1.3954	1.3396
263	1.3393	1.3442	1.3442	1.3601	1.4042	1.3432	1.3393	1.3626	1.3954	1.3396
262	1.3393	1.3442	1.3442	1.3602	1.4042	1.3432	1.3393	1.3626	1.3954	1.3396
261	1.3393	1.3442	1.3442	1.3602	1.4042	1.3432	1.3393	1.3626	1.3954	1.3396
260	1.3393	1.3442	1.3442	1.3602	1.4042	1.3432	1.3393	1.3626	1.3954	1.3396
259	1.3393	1.3442	1.3442	1.3602	1.4042	1.3432	1.3393	1.3626	1.3954	1.3396
258	1.3393	1.3442	1.3442	1.3602	1.4042	1.3432	1.3393	1.3626	1.3954	1.3396
257	1.3393	1.3442	1.3442	1.3602	1.4042	1.3432	1.3393	1.3626	1.3954	1.3396
256	1.3393	1.3442	1.3442	1.3602	1.4042	1.3432	1.3393	1.3626	1.3954	1.3396
255	1.3393	1.3442	1.3442	1.3602	1.4043	1.3432	1.3393	1.3626	1.3954	1.3396
254	1.3393	1.3442	1.3442	1.3602	1.4043	1.3432	1.3393	1.3626	1.3954	1.3396
253	1.3393	1.3442	1.3442	1.3602	1.4043	1.3432	1.3393	1.3626	1.3954	1.3396
252	1.3393	1.3442	1.3442	1.3602	1.4042	1.3432	1.3393	1.3626	1.3954	1.3396
251	1.3393	1.3442	1.3442	1.3602	1.4042	1.3432	1.3393	1.3626	1.3954	1.3396
250	1.3393	1.3442	1.3442	1.3602	1.4042	1.3432	1.3393	1.3626	1.3954	1.3396

## Sheet: k(lambda)
Wavelength /nm	kwater /M-1	koxalic acid /M-1	kmalonic acid /M-1	khydoxymalonic acid /M-1	ksuccinic acid /M-1	kglutaric acid /M-1	kpyrovuic acid /M-1	kbenzoic acid /M-1	kphthalic acid /M-1	kpinonic acid /M-1	kammonium sulfate /M-1
1100	3.20737e-08	1e-09	1e-09	1e-09	1e-09	7e-09	1.339e-12	1e-09	1.05e-07	1e-09	8.6e-08
1099	3.12992e-08	1e-09	1e-09	1e-09	1e-09	7e-09	1.339e-12	1e-09	1.05e-07	1e-09	8.6e-08
1098	3.06057e-08	1e-09	1e-09	1e-09	1e-09	7e-09	2.679e-12	1e-09	1.05e-07	1e-09	8.6e-08
1097	3.00346e-08	1e-09	1e-09	1e-09	1e-09	7e-09	4.018e-12	1e-09	1.05e-07	1e-09	8.6e-08
1096	2.95068e-08	1e-09	1e-09	1e-09	1e-09	7e-09	5.357e-12	1e-09	1.05e-07	1e-09	8.6e-08
1095	2.90343e-08	1e-09	1e-09	1e-09	1e-09	7e-09	6.696e-12	1e-09	1.05e-07	1e-09	8.6e-08
1094	2.86202e-08	1e-09	1e-09	1e-09	1e-09	7e-09	8.036e-12	1e-09	1.05e-07	1e-09	8.6e-08
1093	2.82212e-08	1e-09	1e-09	1e-09	1e-09	7e-09	9.375e-12	1e-09	1.05e-07	1e-09	8.6e-08
1092	2.7788e-08	1e-09	1e-09	1e-09	1e-09	7e-09	1.071e-11	1e-09	1.05e-07	1e-09	8.6e-08
1091	2.73439e-08	1e-09	1e-09	1e-09	1e-09	7e-09	1.205e-11	1e-09	1.056e-07	1e-09	8.6e-08
1090	2.70136e-08	1e-09	1e-09	1e-09	1e-09	7e-09	1.339e-11	1e-09	1.063e-07	1e-09	8.6e-08
1089	2.66817e-08	1e-09	1e-09	1e-09	1e-09	7e-09	1.473e-11	1e-09	1.069e-07	1e-09	8.6e-08
1088	2.63381e-08	1e-09	1e-09	1e-09	1e-09	7e-09	1.607e-11	1e-09	1.075e-07	1e-09	8.6e-08
1087	2.59849e-08	1e-09	1e-09	1e-09	1e-09	7e-09	1.741e-11	1e-09	1.082e-07	1e-09	8.6e-08
1086	2.56378e-08	1e-09	1e-09	1e-09	1e-09	7e-09	1.875e-11	1e-09	1.088e-07	1e-09	8.6e-08
1085	2.52894e-08	1e-09	1e-09	1e-09	1e-09	7e-09	2.009e-11	1e-09	1.094e-07	1e-09	8.6e-08
1084	2.49071e-08	1e-09	1e-09	1e-09	1e-09	7e-09	2.143e-11	1e-09	1.1e-07	1e-09	8.6e-08
1083	2.4645e-08	1e-09	1e-09	1e-09	1e-09	7e-09	2.277e-11	1e-09	1.107e-07	1e-09	8.6e-08
1082	2.43385e-08	1e-09	1e-09	1e-09	1e-09	7e-09	2.411e-11	1e-09	1.113e-07	1e-09	8.6e-08
1081	2.41256e-08	1e-09	1e-09	1e-09	1e-09	7e-09	2.545e-11	1e-09	1.119e-07	1e-09	8.6e-08
1080	2.39322e-08	1e-09	1e-09	1e-09	1e-09	7e-09	2.679e-11	1e-09	1.125e-07	1e-09	8.6e-08
1079	2.37099e-08	1e-09	1e-09	1e-09	1e-09	7e-09	2.813e-11	1e-09	1.132e-07	1e-09	8.6e-08
1078	2.35867e-08	1e-09	1e-09	1e-09	1e-09	7e-09	2.946e-11	1e-09	1.138e-07	1e-09	8.6e-08
1077	2.34379e-08	1e-09	1e-09	1e-09	1e-09	7e-09	3.08e-11	1e-09	1.144e-07	1e-09	8.6e-08
1076	2.33004e-08	1e-09	1e-09	1e-09	1e-09	7e-09	3.214e-11	1e-09	1.151e-07	1e-09	8.6e-08
1075	2.32261e-08	1e-09	1e-09	1e-09	1e-09	7e-09	3.348e-11	1e-09	1.157e-07	1e-09	8.6e-08
1074	2.31571e-08	1e-09	1e-09	1e-09	1e-09	7e-09	3.482e-11	1e-09	1.163e-07	1e-09	8.6e-08
1073	2.30737e-08	1e-09	1e-09	1e-09	1e-09	7e-09	3.616e-11	1e-09	1.169e-07	1e-09	8.6e-08
1072	2.30362e-08	1e-09	1e-09	1e-09	1e-09	7e-09	3.75e-11	1e-09	1.176e-07	1e-09	8.6e-08
1071	2.30199e-08	1e-09	1e-09	1e-09	1e-09	7e-09	3.884e-11	1e-09	1.182e-07	1e-09	8.6e-08
1070	2.30111e-08	1e-09	1e-09	1e-09	1e-09	7e-09	4.018e-11	1e-09	1.188e-07	1e-09	8.6e-08
1069	2.30307e-08	1e-09	1e-09	1e-09	1e-09	7e-09	4.152e-11	1e-09	1.194e-07	1e-09	8.6e-08
1068	2.30353e-08	1e-09	1e-09	1e-09	1e-09	7e-09	4.286e-11	1e-09	1.201e-07	1e-09	8.6e-08
1067	2.30717e-08	1e-09	1e-09	1e-09	1e-09	7e-09	4.42e-11	1e-09	1.207e-07	1e-09	8.6e-08
1066	2.30763e-08	1e-09	1e-09	1e-09	1e-09	7e-09	4.554e-11	1e-09	1.213e-07	1e-09	8.6e-08
1065	2.31872e-08	1e-09	1e-09	1e-09	1e-09	7e-09	4.688e-11	1e-09	1.219e-07	1e-09	8.6e-08
1064	2.32864e-08	1e-09	1e-09	1e-09	1e-09	7e-09	4.821e-11	1e-09	1.226e-07	1e-09	8.6e-08
1063	2.33459e-08	1e-09	1e-09	1e-09	1e-09	7e-09	4.955e-11	1e-09	1.232e-07	1e-09	8.6e-08
1062	2.35308e-08	1e-09	1e-09	1e-09	1e-09	7e-09	5.089e-11	1e-09	1.238e-07	1e-09	8.6e-08
1061	2.36692e-08	1e-09	1e-09	1e-09	1e-09	7e-09	5.223e-11	1e-09	1.245e-07	1e-09	8.6e-08
1060	2.38192e-08	1e-09	1e-09	1e-09	1e-09	7e-09	5.357e-11	1e-09	1.251e-07	1e-09	8.6e-08
1059	2.39765e-08	1e-09	1e-09	1e-09	1e-09	7e-09	5.491e-11	1e-09	1.257e-07	1e-09	8.6e-08
1058	2.41327e-08	1e-09	1e-09	1e-09	1e-09	7e-09	5.625e-11	1e-09	1.263e-07	1e-09	8.6e-08
1057	2.4293e-08	1e-09	1e-09	1e-09	1e-09	7e-09	5.759e-11	1e-09	1.27e-07	1e-09	8.6e-08
1056	2.45157e-08	1e-09	1e-09	1e-09	1e-09	7e-09	5.893e-11	1e-09	1.276e-07	1e-09	8.6e-08
1055	2.47215e-08	1e-09	1e-09	1e-09	1e-09	7e-09	6.027e-11	1e-09	1.282e-07	1e-09	8.6e-08
1054	2.49757e-08	1e-09	1e-09	1e-09	1e-09	7e-09	6.161e-11	1e-09	1.288e-07	1e-09	8.6e-08
1053	2.52165e-08	1e-09	1e-09	1e-09	1e-09	7e-09	6.295e-11	1e-09	1.295e-07	1e-09	8.6e-08
1052	2.55244e-08	1e-09	1e-09	1e-09	1e-09	7e-09	6.429e-11	1e-09	1.301e-07	1e-09	8.6e-08
1051	2.58158e-08	1e-09	1e-09	1e-09	1e-09	7e-09	6.563e-11	1e-09	1.307e-07	1e-09	8.6e-08
1050	2.61417e-08	1e-09	1e-09	1e-09	1e-09	7e-09	6.696e-11	1e-09	1.314e-07	1e-09	8.6e-08
1049	2.65148e-08	1e-09	1e-09	1e-09	1e-09	7e-09	6.83e-11	1e-09	1.32e-07	1e-09	8.6e-08
1048	2.68686e-08	1e-09	1e-09	1e-09	1e-09	7e-09	6.964e-11	1e-09	1.326e-07	1e-09	8.6e-08
1047	2.72573e-08	1e-09	1e-09	1e-09	1e-09	7e-09	7.098e-11	1e-09	1.332e-07	1e-09	8.6e-08
1046	2.76733e-08	1e-09	1e-09	1e-09	1e-09	7e-09	7.232e-11	1e-09	1.339e-07	1e-09	8.6e-08
1045	2.80988e-08	1e-09	1e-09	1e-09	1e-09	7e-09	7.366e-11	1e-09	1.345e-07	1e-09	8.6e-08
1044	2.85408e-08	1e-09	1e-09	1e-09	1e-09	7e-09	7.5e-11	1e-09	1.351e-07	1e-09	8.6e-08
1043	2.9013e-08	1e-09	1e-09	1e-09	1e-09	7e-09	7.634e-11	1e-09	1.357e-07	1e-09	8.6e-08
1042	2.94929e-08	1e-09	1e-09	1e-09	1e-09	7e-09	7.768e-11	1e-09	1.364e-07	1e-09	8.6e-08
1041	2.99589e-08	1e-09	1e-09	1e-09	1e-09	7e-09	7.902e-11	1e-09	1.37e-07	1e-09	8.6e-08
1040	3.04655e-08	1e-09	1e-09	1e-09	1e-09	7e-09	8.036e-11	1e-09	1.376e-07	1e-09	8.6e-08
1039	3.09833e-08	1e-09	1e-09	1e-09	1e-09	7e-09	8.17e-11	1e-09	1.383e-07	1e-09	8.6e-08
1038	3.15068e-08	1e-09	1e-09	1e-09	1e-09	7e-09	8.304e-11	1e-09	1.389e-07	1e-09	8.6e-08
1037	3.20349e-08	1e-09	1e-09	1e-09	1e-09	7e-09	8.438e-11	1e-09	1.395e-07	1e-09	8.6e-08
1036	3.26194e-08	1e-09	1e-09	1e-09	1e-09	7e-09	8.571e-11	1e-09	1.401e-07	1e-09	8.6e-08
1035	3.31834e-08	1e-09	1e-09	1e-09	1e-09	7e-09	8.705e-11	1e-09	1.408e-07	1e-09	8.6e-08
1034	3.3785e-08	1e-09	1e-09	1e-09	1e-09	7e-09	8.839e-11	1e-09	1.414e-07	1e-09	8.6e-08
1033	3.44036e-08	1e-09	1e-09	1e-09	1e-09	7e-09	8.973e-11	1e-09	1.42e-07	1e-09	8.6e-08
1032	3.5009e-08	1e-09	1e-09	1e-09	1e-09	7e-09	9.107e-11	1e-09	1.426e-07	1e-09	8.6e-08
1031	3.56485e-08	1e-09	1e-09	1e-09	1e-09	7e-09	9.241e-11	1e-09	1.433e-07	1e-09	8.6e-08
1030	3.62818e-08	1e-09	1e-09	1e-09	1e-09	7e-09	9.375e-11	1e-09	1.439e-07	1e-09	8.6e-08
1029	3.69664e-08	1e-09	1e-09	1e-09	1e-09	7e-09	9.509e-11	1e-09	1.445e-07	1e-09	8.6e-08
1028	3.76479e-08	1e-09	1e-09	1e-09	1e-09	7e-09	9.643e-11	1e-09	1.452e-07	1e-09	8.6e-08
1027	3.83483e-08	1e-09	1e-09	1e-09	1e-09	7e-09	9.777e-11	1e-09	1.458e-07	1e-09	8.6e-08
1026	3.90517e-08	1e-09	1e-09	1e-09	1e-09	7e-09	9.911e-11	1e-09	1.464e-07	1e-09	8.6e-08
1025	3.9764e-08	1e-09	1e-09	1e-09	1e-09	7e-09	1.004e-10	1e-09	1.47e-07	1e-09	8.6e-08
1024	4.04947e-08	1e-09	1e-09	1e-09	1e-09	7e-09	1.018e-10	1e-09	1.477e-07	1e-09	8.6e-08
1023	4.1223e-08	1e-09	1e-09	1e-09	1e-09	7e-09	1.031e-10	1e-09	1.483e-07	1e-09	8.6e-08
1022	4.19685e-08	1e-09	1e-09	1e-09	1e-09	7e-09	1.045e-10	1e-09	1.489e-07	1e-09	8.6e-08
1021	4.27262e-08	1e-09	1e-09	1e-09	1e-09	7e-09	1.058e-10	1e-09	1.495e-07	1e-09	8.6e-08
1020	4.34956e-08	1e-09	1e-09	1e-09	1e-09	7e-09	1.071e-10	1e-09	1.502e-07	1e-09	8.6e-08
1019	4.42584e-08	1e-09	1e-09	1e-09	1e-09	7e-09	1.085e-10	1e-09	1.508e-07	1e-09	8.6e-08
1018	4.50166e-08	1e-09	1e-09	1e-09	1e-09	7e-09	1.098e-10	1e-09	1.514e-07	1e-09	8.6e-08
1017	4.57829e-08	1e-09	1e-09	1e-09	1e-09	7e-09	1.112e-10	1e-09	1.52e-07	1e-09	8.6e-08
1016	4.65414e-08	1e-09	1e-09	1e-09	1e-09	7e-09	1.125e-10	1e-09	1.527e-07	1e-09	8.6e-08
1015	4.73084e-08	1e-09	1e-09	1e-09	1e-09	7e-09	1.138e-10	1e-09	1.533e-07	1e-09	8.6e-08
1014	4.8062e-08	1e-09	1e-09	1e-09	1e-09	7e-09	1.152e-10	1e-09	1.539e-07	1e-09	8.6e-08
1013	4.88323e-08	1e-09	1e-09	1e-09	1e-09	7e-09	1.165e-10	1e-09	1.546e-07	1e-09	8.6e-08
1012	4.95938e-08	1e-09	1e-09	1e-09	1e-09	7e-09	1.179e-10	1e-09	1.552e-07	1e-09	8.6e-08
1011	5.03603e-08	1e-09	1e-09	1e-09	1e-09	7e-09	1.192e-10	1e-09	1.558e-07	1e-09	8.6e-08
1010	5.11083e-08	1e-09	1e-09	1e-09	1e-09	7e-09	1.205e-10	1e-09	1.564e-07	1e-09	8.6e-08
1009	5.18538e-08	1e-09	1e-09	1e-09	1e-09	7e-09	1.219e-10	1e-09	1.571e-07	1e-09	8.6e-08
1008	5.25996e-08	1e-09	1e-09	1e-09	1e-09	7e-09	1.232e-10	1e-09	1.577e-07	1e-09	8.6e-08
1007	5.33259e-08	1e-09	1e-09	1e-09	1e-09	7e-09	1.246e-10	1e-09	1.583e-07	1e-09	8.6e-08
1006	5.40592e-08	1e-09	1e-09	1e-09	1e-09	7e-09	1.259e-10	1e-09	1.589e-07	1e-09	8.6e-08
1005	5.4777e-08	1e-09	1e-09	1e-09	1e-09	7e-09	1.272e-10	1e-09	1.596e-07	1e-09	8.6e-08
1004	5.55025e-08	1e-09	1e-09	1e-09	1e-09	7e-09	1.286e-10	1e-09	1.602e-07	1e-09	8.6e-08
1003	5.62031e-08	1e-09	1e-09	1e-09	1e-09	7e-09	1.299e-10	1e-09	1.608e-07	1e-09	8.6e-08
1002	5.68964e-08	1e-09	1e-09	1e-09	1e-09	7e-09	1.313e-10	1e-09	1.615e-07	1e-09	8.6e-08
1001	5.75785e-08	1.1e-09	1e-09	1e-09	1e-09	7e-09	1.326e-10	1e-09	1.621e-07	1e-09	8.6e-08
1000	5.82429e-08	2.3e-09	1e-09	1e-09	1e-09	7e-09	1.339e-10	1e-09	1.627e-07	1e-09	8.6e-08
999	5.88894e-08	5.5e-09	1e-09	1e-09	1e-09	7e-09	1.353e-10	1e-09	1.633e-07	1e-09	8.6e-08
998	5.95234e-08	1.08e-08	1e-09	1e-09	1e-09	7e-09	1.366e-10	1e-09	1.64e-07	1e-09	8.6e-08
997	6.01487e-08	1.47e-08	1e-09	1e-09	1e-09	7e-09	1.379e-10	1e-09	1.646e-07	1e-09	8.6e-08
996	6.07551e-08	2.03e-08	1e-09	1e-09	1e-09	7e-09	1.393e-10	1e-09	1.652e-07	1e-09	8.6e-08
995	6.13365e-08	2.31e-08	1e-09	1e-09	1e-09	7e-09	1.406e-10	1e-09	1.658e-07	1e-09	8.6e-08
994	6.19039e-08	2.91e-08	1e-09	1e-09	1e-09	7e-09	1.42e-10	1e-09	1.665e-07	1e-09	8.6e-08
993	6.24557e-08	3.15e-08	1e-09	1e-09	1e-09	7e-09	1.433e-10	1e-09	1.671e-07	1e-09	8.6e-08
992	6.29868e-08	3.83e-08	1e-09	1e-09	1e-09	7e-09	1.446e-10	1e-09	1.677e-07	1e-09	8.6e-08
991	6.34969e-08	4.17e-08	1e-09	1e-09	1e-09	7e-09	1.46e-10	1e-09	1.684e-07	1e-09	8.6e-08
990	6.39933e-08	4.25e-08	1e-09	1e-09	1e-09	7e-09	1.473e-10	1e-09	1.69e-07	1e-09	8.6e-08
989	6.44578e-08	4.74e-08	1e-09	1e-09	1e-09	7e-09	1.487e-10	1e-09	1.696e-07	1e-09	8.6e-08
988	6.4906e-08	4.9e-08	1e-09	1e-09	1e-09	7e-09	1.5e-10	1e-09	1.702e-07	1e-09	8.6e-08
987	6.53194e-08	5.31e-08	1e-09	1e-09	1e-09	7e-09	1.513e-10	1e-09	1.709e-07	1e-09	8.6e-08
986	6.57052e-08	5.44e-08	1e-09	1e-09	1e-09	7e-09	1.527e-10	1e-09	1.715e-07	1e-09	8.6e-08
985	6.60598e-08	5.62e-08	1e-09	1e-09	1e-09	7e-09	1.54e-10	1e-09	1.721e-07	1e-09	8.6e-08
984	6.63764e-08	5.65e-08	1e-09	1e-09	1e-09	7e-09	1.554e-10	1e-09	1.727e-07	1e-09	8.6e-08
983	6.66499e-08	5.87e-08	1e-09	1e-09	1e-09	7e-09	1.567e-10	1e-09	1.734e-07	1e-09	8.6e-08
982	6.68904e-08	6.15e-08	1e-09	1e-09	1e-09	7e-09	1.58e-10	1e-09	1.74e-07	1e-09	8.6e-08
981	6.7085e-08	6.42e-08	1e-09	1e-09	1e-09	7e-09	1.594e-10	1e-09	1.746e-07	1e-09	8.6e-08
980	6.72366e-08	6.74e-08	1e-09	1e-09	1e-09	7e-09	1.607e-10	1e-09	1.753e-07	1e-09	8.6e-08
979	6.73473e-08	6.69e-08	1e-09	1e-09	1e-09	7e-09	1.621e-10	1e-09	1.759e-07	1e-09	8.6e-08
978	6.74177e-08	6.68e-08	1e-09	1e-09	1e-09	7e-09	1.634e-10	1e-09	1.765e-07	1e-09	8.6e-08
977	6.74386e-08	6.6e-08	1e-09	1e-09	1e-09	7e-09	1.647e-10	1e-09	1.771e-07	1e-09	8.6e-08
976	6.74189e-08	6.66e-08	1e-09	1e-09	1e-09	7e-09	1.661e-10	1e-09	1.778e-07	1e-09	8.6e-08
975	6.73555e-08	6.59e-08	1e-09	1e-09	1e-09	7e-09	1.674e-10	1e-09	1.784e-07	1e-09	8.6e-08
974	6.72456e-08	6.4e-08	1e-09	1e-09	1e-09	7e-09	1.688e-10	1e-09	1.79e-07	1e-09	8.6e-08
973	6.70918e-08	6.61e-08	1e-09	1e-09	1e-09	7e-09	1.701e-10	1e-09	1.796e-07	1e-09	8.6e-08
972	6.69059e-08	6.51e-08	1e-09	1e-09	1e-09	7e-09	1.714e-10	1e-09	1.803e-07	1e-09	8.6e-08
971	6.66917e-08	6.35e-08	1e-09	1e-09	1e-09	7e-09	1.728e-10	1e-09	1.809e-07	1e-09	8.6e-08
970	6.64442e-08	6.18e-08	1e-09	1e-09	1e-09	7e-09	1.741e-10	1e-09	1.815e-07	1e-09	8.6e-08
969	6.61687e-08	5.7e-08	1e-09	1e-09	1e-09	7e-09	1.754e-10	1e-09	1.821e-07	1e-09	8.6e-08
968	6.58485e-08	5.4e-08	1e-09	1e-09	1e-09	7e-09	1.768e-10	1e-09	1.828e-07	1e-09	8.6e-08
967	6.54876e-08	5.05e-08	1e-09	1e-09	1e-09	7e-09	1.781e-10	1e-09	1.834e-07	1e-09	8.6e-08
966	6.50804e-08	4.36e-08	1e-09	1e-09	1e-09	7e-09	1.795e-10	1e-09	1.84e-07	1e-09	8.6e-08
965	6.46037e-08	3.76e-08	1e-09	1e-09	1e-09	7e-09	1.808e-10	1e-09	1.847e-07	1e-09	8.6e-08
964	6.40442e-08	2.94e-08	1e-09	1e-09	1e-09	7e-09	1.821e-10	1e-09	1.853e-07	1e-09	8.6e-08
963	6.33755e-08	2.02e-08	1e-09	1e-09	1e-09	7e-09	1.835e-10	1e-09	1.859e-07	1e-09	8.6e-08
962	6.25739e-08	9.4e-09	1e-09	1e-09	1e-09	7e-09	1.848e-10	1e-09	1.865e-07	1e-09	8.6e-08
961	6.1614e-08	1e-09	1e-09	1e-09	1e-09	7e-09	1.862e-10	1e-09	1.872e-07	1e-09	8.6e-08
960	6.04732e-08	1e-09	1e-09	1e-09	1e-09	7e-09	1.875e-10	1e-09	1.878e-07	1e-09	8.6e-08
959	5.91358e-08	1e-09	1e-09	1e-09	1e-09	7e-09	1.888e-10	1e-09	1.884e-07	1e-09	8.6e-08
958	5.75933e-08	1e-09	1e-09	1e-09	1e-09	7e-09	1.902e-10	1e-09	1.89e-07	1e-09	8.6e-08
957	5.58561e-08	1e-09	1e-09	1e-09	1e-09	7e-09	1.915e-10	1e-09	1.897e-07	1e-09	8.6e-08
956	5.39485e-08	1e-09	1e-09	1e-09	1e-09	7e-09	1.929e-10	1e-09	1.903e-07	1e-09	8.6e-08
955	5.19002e-08	1e-09	1e-09	1e-09	1e-09	7e-09	1.942e-10	1e-09	1.909e-07	1e-09	8.6e-08
954	4.97479e-08	1e-09	1e-09	1e-09	1e-09	7e-09	1.955e-10	1e-09	1.916e-07	1e-09	8.6e-08
953	4.75351e-08	1e-09	1e-09	1e-09	1e-09	7e-09	1.969e-10	1e-09	1.922e-07	1e-09	8.6e-08
952	4.53101e-08	1e-09	1e-09	1e-09	1e-09	7e-09	1.982e-10	1e-09	1.928e-07	1e-09	8.6e-08
951	4.31206e-08	1e-09	1e-09	1e-09	1e-09	7e-09	1.996e-10	1e-09	1.934e-07	1e-09	8.6e-08
950	4.10032e-08	1e-09	1e-09	1e-09	1e-09	7e-09	2.009e-10	1e-09	1.941e-07	1e-09	8.6e-08
949	3.89818e-08	1e-09	1e-09	1e-09	1e-09	7e-09	2.022e-10	1e-09	1.947e-07	1e-09	8.6e-08
948	3.70924e-08	1e-09	1e-09	1e-09	1e-09	7e-09	2.036e-10	1e-09	1.953e-07	1e-09	8.6e-08
947	3.53347e-08	1e-09	1e-09	1e-09	1e-09	7e-09	2.049e-10	1e-09	1.959e-07	1e-09	8.6e-08
946	3.3708e-08	1e-09	1e-09	1e-09	1e-09	7e-09	2.063e-10	1e-09	1.966e-07	1e-09	8.6e-08
945	3.22021e-08	1e-09	1e-09	1e-09	1e-09	7e-09	2.076e-10	1e-09	1.972e-07	1e-09	8.6e-08
944	3.08102e-08	1e-09	1e-09	1e-09	1e-09	7e-09	2.089e-10	1e-09	1.978e-07	1e-09	8.6e-08
943	2.9517e-08	1e-09	1e-09	1e-09	1e-09	7e-09	2.103e-10	1e-09	1.985e-07	1e-09	8.6e-08
942	2.82997e-08	1e-09	1e-09	1e-09	1e-09	7e-09	2.116e-10	1e-09	1.991e-07	1e-09	8.6e-08
941	2.7151e-08	1e-09	1e-09	1e-09	1e-09	7e-09	2.129e-10	1e-09	1.997e-07	1e-09	8.6e-08
940	2.60612e-08	1e-09	1e-09	1e-09	1e-09	7e-09	2.143e-10	1e-09	2.003e-07	1e-09	8.6e-08
939	2.50194e-08	1e-09	1e-09	1e-09	1e-09	7e-09	2.156e-10	1e-09	2.01e-07	1e-09	8.6e-08
938	2.40205e-08	1e-09	1e-09	1e-09	1e-09	7e-09	2.17e-10	1e-09	2.016e-07	1e-09	8.6e-08
937	2.30617e-08	1e-09	1e-09	1e-09	1e-09	7e-09	2.183e-10	1e-09	2.022e-07	1e-09	8.6e-08
936	2.21396e-08	1e-09	1e-09	1e-09	1e-09	7e-09	2.196e-10	1e-09	2.028e-07	1e-09	8.6e-08
935	2.12523e-08	1e-09	1e-09	1e-09	1e-09	7e-09	2.21e-10	1e-09	2.035e-07	1e-09	8.6e-08
934	2.03987e-08	1e-09	1e-09	1e-09	1e-09	7e-09	2.223e-10	1e-09	2.041e-07	1e-09	8.6e-08
933	1.95799e-08	1e-09	1e-09	1e-09	1e-09	7e-09	2.237e-10	1e-09	2.047e-07	1e-09	8.6e-08
932	1.88005e-08	1e-09	1e-09	1e-09	1e-09	7e-09	2.25e-10	1e-09	2.054e-07	1e-09	8.6e-08
931	1.80544e-08	1e-09	1e-09	1e-09	1e-09	7e-09	2.263e-10	1e-09	2.06e-07	1e-09	8.6e-08
930	1.73454e-08	1e-09	1e-09	1e-09	1e-09	7e-09	2.277e-10	1e-09	2.066e-07	1e-09	8.6e-08
929	1.66718e-08	1e-09	1e-09	1e-09	1e-09	7e-09	2.29e-10	1e-09	2.072e-07	1e-09	8.6e-08
928	1.60401e-08	1e-09	1e-09	1e-09	1e-09	7e-09	2.304e-10	1e-09	2.079e-07	1e-09	8.6e-08
927	1.54453e-08	1e-09	1e-09	1e-09	1e-09	7e-09	2.317e-10	1e-09	2.085e-07	1e-09	8.6e-08
926	1.48885e-08	1e-09	1e-09	1e-09	1e-09	7e-09	2.33e-10	1e-09	2.091e-07	1e-09	8.6e-08
925	1.43696e-08	1e-09	1e-09	1e-09	1e-09	7e-09	2.344e-10	1e-09	2.097e-07	1e-09	8.6e-08
924	1.38902e-08	1e-09	1e-09	1e-09	1e-09	7e-09	2.357e-10	1e-09	2.104e-07	1e-09	8.6e-08
923	1.34443e-08	1e-09	1e-09	1e-09	1e-09	7e-09	2.371e-10	1e-09	2.11e-07	1e-09	8.6e-08
922	1.30333e-08	1e-09	1e-09	1e-09	1e-09	7e-09	2.384e-10	1e-09	2.116e-07	1e-09	8.6e-08
921	1.26576e-08	1e-09	1e-09	1e-09	1e-09	7e-09	2.397e-10	1e-09	2.122e-07	1e-09	8.6e-08
920	1.23132e-08	1e-09	1e-09	1e-09	1e-09	7e-09	2.411e-10	1e-09	2.129e-07	1e-09	8.6e-08
919	1.2001e-08	1e-09	1e-09	1e-09	1e-09	7e-09	2.424e-10	1e-09	2.135e-07	1e-09	8.6e-08
918	1.17161e-08	1e-09	1e-09	1e-09	1e-09	7e-09	2.438e-10	1e-09	2.141e-07	1e-09	8.6e-08
917	1.14556e-08	1e-09	1e-09	1e-09	1e-09	7e-09	2.451e-10	1e-09	2.148e-07	1e-09	8.6e-08
916	1.12196e-08	1e-09	1e-09	1e-09	1e-09	7e-09	2.464e-10	1e-09	2.154e-07	1e-09	8.6e-08
915	1.10063e-08	1e-09	1e-09	1e-09	1e-09	7e-09	2.478e-10	1e-09	2.16e-07	1e-09	8.6e-08
914	1.08091e-08	1e-09	1e-09	1e-09	1e-09	7e-09	2.491e-10	1e-09	2.166e-07	1e-09	8.6e-08
913	1.06296e-08	1e-09	1e-09	1e-09	1e-09	7e-09	2.504e-10	1e-09	2.173e-07	1e-09	8.6e-08
912	1.04666e-08	1e-09	1e-09	1e-09	1e-09	7e-09	2.518e-10	1e-09	2.179e-07	1e-09	8.6e-08
911	1.03157e-08	1e-09	1e-09	1e-09	1e-09	7e-09	2.531e-10	1e-09	2.185e-07	1e-09	8.6e-08
910	1.01784e-08	1e-09	1e-09	1e-09	1e-09	7e-09	2.545e-10	1e-09	2.191e-07	1e-09	8.6e-08
909	1.00511e-08	1e-09	1e-09	1e-09	1e-09	7e-09	2.558e-10	1e-09	2.198e-07	1e-09	8.6e-08
908	9.9326e-09	1e-09	1e-09	1e-09	1e-09	7e-09	2.571e-10	1e-09	2.204e-07	1e-09	8.6e-08
907	9.8168e-09	1e-09	1e-09	1e-09	1e-09	7e-09	2.585e-10	1e-09	2.21e-07	1e-09	8.6e-08
906	9.7083e-09	1e-09	1e-09	1e-09	1e-09	7e-09	2.598e-10	1e-09	2.217e-07	1e-09	8.6e-08
905	9.6076e-09	1e-09	1e-09	1e-09	1e-09	7e-09	2.612e-10	1e-09	2.223e-07	1e-09	8.6e-08
904	9.5101e-09	1e-09	1e-09	1e-09	1e-09	7e-09	2.625e-10	1e-09	2.229e-07	1e-09	8.6e-08
903	9.4186e-09	1e-09	1e-09	1e-09	1e-09	7e-09	2.638e-10	1e-09	2.235e-07	1e-09	8.6e-08
902	9.3301e-09	1e-09	1e-09	1e-09	1e-09	7e-09	2.652e-10	1e-09	2.242e-07	1e-09	8.6e-08
901	9.2405e-09	1e-09	1e-09	1e-09	1e-09	7e-09	2.665e-10	1e-09	2.248e-07	1e-09	8.6e-08
900	9.1552e-09	1e-09	1e-09	1e-09	1e-09	7e-09	2.679e-10	1e-09	2.254e-07	1e-09	8.6e-08
899	9.0706e-09	1e-09	1e-09	1e-09	1e-09	7e-09	2.692e-10	1e-09	2.26e-07	1e-09	8.6e-08
898	8.9858e-09	1e-09	1e-09	1e-09	1e-09	7e-09	2.705e-10	1e-09	2.267e-07	1e-09	8.6e-08
897	8.9058e-09	1e-09	1e-09	1e-09	1e-09	7e-09	2.719e-10	1e-09	2.273e-07	1e-09	8.6e-08
896	8.8273e-09	1e-09	1e-09	1e-09	1e-09	7e-09	2.732e-10	1e-09	2.279e-07	1e-09	8.6e-08
895	8.7474e-09	1e-09	1e-09	1e-09	1e-09	7e-09	2.746e-10	1e-09	2.286e-07	1e-09	8.6e-08
894	8.6662e-09	1e-09	1e-09	1e-09	1e-09	7e-09	2.759e-10	1e-09	2.292e-07	1e-09	8.6e-08
893	8.5876e-09	1e-09	1e-09	1e-09	1e-09	7e-09	2.772e-10	1e-09	2.298e-07	1e-09	8.6e-08
892	8.509e-09	1e-09	1e-09	1e-09	1e-09	7e-09	2.786e-10	1e-09	2.304e-07	1e-09	8.6e-08
891	8.4289e-09	1e-09	1e-09	1e-09	1e-09	7e-09	2.799e-10	1e-09	2.311e-07	1e-09	8.6e-08
890	8.3495e-09	1e-09	1e-09	1e-09	1e-09	7e-09	2.813e-10	1e-09	2.317e-07	1e-09	8.6e-08
889	8.2713e-09	1e-09	1e-09	1e-09	1e-09	7e-09	2.826e-10	1e-09	2.323e-07	1e-09	8.6e-08
888	8.1906e-09	1e-09	1e-09	1e-09	1e-09	7e-09	2.839e-10	1e-09	2.329e-07	1e-09	8.6e-08
887	8.1107e-09	1e-09	1e-09	1e-09	1e-09	7e-09	2.853e-10	1e-09	2.336e-07	1e-09	8.6e-08
886	8.026e-09	1e-09	1e-09	1e-09	1e-09	7e-09	2.866e-10	1e-09	2.342e-07	1e-09	8.6e-08
885	7.9398e-09	1e-09	1e-09	1e-09	1e-09	7e-09	2.879e-10	1e-09	2.348e-07	1e-09	8.6e-08
884	7.8544e-09	1e-09	1e-09	1e-09	1e-09	7e-09	2.893e-10	1e-09	2.355e-07	1e-09	8.6e-08
883	7.7684e-09	1e-09	1e-09	1e-09	1e-09	7e-09	2.906e-10	1e-09	2.361e-07	1e-09	8.6e-08
882	7.6825e-09	1e-09	1e-09	1e-09	1e-09	7e-09	2.92e-10	1e-09	2.367e-07	1e-09	8.6e-08
881	7.5995e-09	1e-09	1e-09	1e-09	1e-09	7e-09	2.933e-10	1e-09	2.373e-07	1e-09	8.6e-08
880	7.5141e-09	1e-09	1e-09	1e-09	1e-09	7e-09	2.946e-10	1e-09	2.38e-07	1e-09	8.6e-08
879	7.4307e-09	1e-09	1e-09	1e-09	1e-09	7e-09	2.96e-10	1e-09	2.386e-07	1e-09	8.6e-08
878	7.3494e-09	1e-09	1e-09	1e-09	1e-09	7e-09	2.973e-10	1e-09	2.392e-07	1e-09	8.6e-08
877	7.2713e-09	1e-09	1e-09	1e-09	1e-09	7e-09	2.987e-10	1e-09	2.398e-07	1e-09	8.6e-08
876	7.1955e-09	1e-09	1e-09	1e-09	1e-09	7e-09	3e-10	1e-09	2.405e-07	1e-09	8.6e-08
875	7.1215e-09	1e-09	1e-09	1e-09	1e-09	7e-09	3.013e-10	1e-09	2.411e-07	1e-09	8.6e-08
874	7.0488e-09	1e-09	1e-09	1e-09	1e-09	7e-09	3.027e-10	1e-09	2.417e-07	1e-09	8.6e-08
873	6.9785e-09	1e-09	1e-09	1e-09	1e-09	7e-09	3.04e-10	1e-09	2.423e-07	1e-09	8.6e-08
872	6.9079e-09	1e-09	1e-09	1e-09	1e-09	7e-09	3.054e-10	1e-09	2.43e-07	1e-09	8.6e-08
871	6.8406e-09	1e-09	1e-09	1e-09	1e-09	7e-09	3.067e-10	1e-09	2.436e-07	1e-09	8.6e-08
870	6.7745e-09	1e-09	1e-09	1e-09	1e-09	7e-09	3.08e-10	1e-09	2.442e-07	1e-09	8.6e-08
869	6.7138e-09	1e-09	1e-09	1e-09	1e-09	7e-09	3.094e-10	1e-09	2.449e-07	1e-09	8.6e-08
868	6.6558e-09	1e-09	1e-09	1e-09	1e-09	7e-09	3.107e-10	1e-09	2.455e-07	1e-09	8.6e-08
867	6.6002e-09	1e-09	1e-09	1e-09	1e-09	7e-09	3.121e-10	1e-09	2.461e-07	1e-09	8.6e-08
866	6.5444e-09	1e-09	1e-09	1e-09	1e-09	7e-09	3.134e-10	1e-09	2.467e-07	1e-09	8.6e-08
865	6.4921e-09	1e-09	1e-09	1e-09	1e-09	7e-09	3.147e-10	1e-09	2.474e-07	1e-09	8.6e-08
864	6.4421e-09	1e-09	1e-09	1e-09	1e-09	7e-09	3.161e-10	1e-09	2.48e-07	1e-09	8.6e-08
863	6.3966e-09	1e-09	1e-09	1e-09	1e-09	7e-09	3.174e-10	1e-09	2.486e-07	1e-09	8.6e-08
862	6.3543e-09	1e-09	1e-09	1e-09	1e-09	7e-09	3.188e-10	1e-09	2.492e-07	1e-09	8.6e-08
861	6.3145e-09	1e-09	1e-09	1e-09	1e-09	7e-09	3.201e-10	1e-09	2.499e-07	1e-09	8.6e-08
860	6.2703e-09	1e-09	1e-09	1e-09	1e-09	7e-09	3.214e-10	1e-09	2.505e-07	1e-09	8.6e-08
859	6.2257e-09	1e-09	1e-09	1e-09	1e-09	7e-09	3.228e-10	1e-09	2.511e-07	1e-09	8.6e-08
858	6.1813e-09	1e-09	1e-09	1e-09	1e-09	7e-09	3.241e-10	1e-09	2.518e-07	1e-09	8.6e-08
857	6.1377e-09	1e-09	1e-09	1e-09	1e-09	7e-09	3.254e-10	1e-09	2.524e-07	1e-09	8.6e-08
856	6.0936e-09	1e-09	1e-09	1e-09	1e-09	7e-09	3.268e-10	1e-09	2.53e-07	1e-09	8.6e-08
855	6.0512e-09	1e-09	1e-09	1e-09	1e-09	7e-09	3.281e-10	1e-09	2.536e-07	1e-09	8.6e-08
854	6.0078e-09	1e-09	1e-09	1e-09	1e-09	7e-09	3.295e-10	1e-09	2.543e-07	1e-09	8.6e-08
853	5.9653e-09	1e-09	1e-09	1e-09	1e-09	7e-09	3.308e-10	1e-09	2.549e-07	1e-09	8.6e-08
852	5.9221e-09	1e-09	1e-09	1e-09	1e-09	7e-09	3.321e-10	1e-09	2.555e-07	1e-09	8.6e-08
851	5.8773e-09	1e-09	1e-09	1e-09	1e-09	7e-09	3.335e-10	1e-09	2.561e-07	1e-09	8.6e-08
850	5.8323e-09	1e-09	1e-09	1e-09	1e-09	7e-09	3.348e-10	1e-09	2.568e-07	1e-09	8.6e-08
849	5.7893e-09	1e-09	1e-09	1e-09	1e-09	7e-09	3.362e-10	1e-09	2.574e-07	1e-09	8.6e-08
848	5.7476e-09	1e-09	1e-09	1e-09	1e-09	7e-09	3.375e-10	1e-09	2.58e-07	1e-09	8.6e-08
847	5.7069e-09	1e-09	1e-09	1e-09	1e-09	7e-09	3.388e-10	1e-09	2.587e-07	1e-09	8.6e-08
846	5.6685e-09	1e-09	1e-09	1e-09	1e-09	7e-09	3.402e-10	1e-09	2.593e-07	1e-09	8.6e-08
845	5.628e-09	1e-09	1e-09	1e-09	1e-09	7e-09	3.415e-10	1e-09	2.599e-07	1e-09	8.6e-08
844	5.5824e-09	1e-09	1e-09	1e-09	1e-09	7e-09	3.429e-10	1e-09	2.605e-07	1e-09	8.6e-08
843	5.542e-09	1e-09	1e-09	1e-09	1e-09	7e-09	3.442e-10	1e-09	2.612e-07	1e-09	8.6e-08
842	5.4995e-09	1e-09	1e-09	1e-09	1e-09	7e-09	3.455e-10	1e-09	2.618e-07	1e-09	8.6e-08
841	5.4576e-09	1e-09	1e-09	1e-09	1e-09	7e-09	3.469e-10	1e-09	2.624e-07	1e-09	8.6e-08
840	5.4125e-09	1e-09	1e-09	1e-09	1e-09	7e-09	3.482e-10	1e-09	2.63e-07	1e-09	8.6e-08
839	5.3644e-09	1e-09	1e-09	1e-09	1e-09	7e-09	3.496e-10	1e-09	2.637e-07	1e-09	8.6e-08
838	5.3112e-09	1e-09	1e-09	1e-09	1e-09	7e-09	3.509e-10	1e-09	2.643e-07	1e-09	8.6e-08
837	5.2507e-09	1e-09	1e-09	1e-09	1e-09	7e-09	3.522e-10	1e-09	2.649e-07	1e-09	8.6e-08
836	5.1799e-09	1e-09	1e-09	1e-09	1e-09	7e-09	3.536e-10	1e-09	2.656e-07	1e-09	8.6e-08
835	5.0942e-09	1e-09	1e-09	1e-09	1e-09	7e-09	3.549e-10	1e-09	2.662e-07	1e-09	8.6e-08
834	4.9963e-09	1e-09	1e-09	1e-09	1e-09	7e-09	3.563e-10	1e-09	2.668e-07	1e-09	8.6e-08
833	4.8817e-09	1e-09	1e-09	1e-09	1e-09	7e-09	3.576e-10	1e-09	2.674e-07	1e-09	8.6e-08
832	4.7533e-09	1e-09	1e-09	1e-09	1e-09	7e-09	3.589e-10	1e-09	2.681e-07	1e-09	8.6e-08
831	4.6153e-09	1e-09	1e-09	1e-09	1e-09	7e-09	3.603e-10	1e-09	2.687e-07	1e-09	8.6e-08
830	4.4673e-09	1e-09	1e-09	1e-09	1e-09	7e-09	3.616e-10	1e-09	2.693e-07	1e-09	8.6e-08
829	4.3166e-09	1e-09	1e-09	1e-09	1e-09	7e-09	3.629e-10	1e-09	2.699e-07	1e-09	8.6e-08
828	4.167e-09	1e-09	1e-09	1e-09	1e-09	7e-09	3.643e-10	1e-09	2.706e-07	1e-09	8.6e-08
827	4.0246e-09	1e-09	1e-09	1e-09	1e-09	7e-09	3.656e-10	1e-09	2.712e-07	1e-09	8.6e-08
826	3.8875e-09	1e-09	1e-09	1e-09	1e-09	7e-09	3.67e-10	1e-09	2.718e-07	1e-09	8.6e-08
825	3.7642e-09	1e-09	1e-09	1e-09	1e-09	7e-09	3.683e-10	1e-09	2.724e-07	1e-09	8.6e-08
824	3.6553e-09	1e-09	1e-09	1e-09	1e-09	7e-09	3.696e-10	1e-09	2.731e-07	1e-09	8.6e-08
823	3.5628e-09	1e-09	1e-09	1e-09	1e-09	7e-09	3.71e-10	1e-09	2.737e-07	1e-09	8.6e-08
822	3.4862e-09	1e-09	1e-09	1e-09	1e-09	7e-09	3.723e-10	1e-09	2.743e-07	1e-09	8.6e-08
821	3.4217e-09	1e-09	1e-09	1e-09	1e-09	7e-09	3.737e-10	1e-09	2.75e-07	1e-09	8.6e-08
820	3.3679e-09	1e-09	1e-09	1e-09	1e-09	7e-09	3.75e-10	1e-09	2.756e-07	1e-09	8.6e-08
819	3.3226e-09	1e-09	1e-09	1e-09	1e-09	7e-09	3.763e-10	1e-09	2.762e-07	1e-09	8.6e-08
818	3.2837e-09	1e-09	1e-09	1e-09	1e-09	7e-09	3.777e-10	1e-09	2.768e-07	1e-09	8.6e-08
817	3.2481e-09	1e-09	1e-09	1e-09	1e-09	7e-09	3.79e-10	1e-09	2.775e-07	1e-09	8.6e-08
816	3.2177e-09	1e-09	1e-09	1e-09	1e-09	7e-09	3.804e-10	1e-09	2.781e-07	1e-09	8.6e-08
815	3.1906e-09	1e-09	1e-09	1e-09	1e-09	7e-09	3.817e-10	1e-09	2.787e-07	1e-09	8.6e-08
814	3.1651e-09	1e-09	1e-09	1e-09	1e-09	7e-09	3.83e-10	1e-09	2.793e-07	1e-09	8.6e-08
813	3.1414e-09	1e-09	1e-09	1e-09	1e-09	7e-09	3.844e-10	1e-09	2.8e-07	1e-09	8.6e-08
812	3.1194e-09	1e-09	1e-09	1e-09	1e-09	7e-09	3.857e-10	1e-09	2.806e-07	1e-09	8.6e-08
811	3.1026e-09	1e-09	1e-09	1e-09	1e-09	7e-09	3.871e-10	1e-09	2.812e-07	1e-09	8.6e-08
810	3.0844e-09	1e-09	1e-09	1e-09	1e-09	7e-09	3.884e-10	1e-09	2.819e-07	1e-09	8.6e-08
809	3.0739e-09	1e-09	1e-09	1e-09	1e-09	7e-09	3.897e-10	1e-09	2.825e-07	1e-09	8.6e-08
808	3.0665e-09	1e-09	1e-09	1e-09	1e-09	7e-09	3.911e-10	1e-09	2.831e-07	1e-09	8.6e-08
807	3.0635e-09	1e-09	1e-09	1e-09	1e-09	7e-09	3.924e-10	1e-09	2.837e-07	1e-09	8.6e-08
806	3.0649e-09	1e-09	1e-09	1e-09	1e-09	7e-09	3.938e-10	1e-09	2.844e-07	1e-09	8.6e-08
805	3.0691e-09	1e-09	1e-09	1e-09	1e-09	7e-09	3.951e-10	1e-09	2.85e-07	1e-09	8.6e-08
804	3.0768e-09	1e-09	1e-09	1e-09	1e-09	7e-09	3.964e-10	1e-09	2.856e-07	1e-09	8.6e-08
803	3.0883e-09	1e-09	1e-09	1e-09	1e-09	7e-09	3.978e-10	1e-09	2.862e-07	1e-09	8.6e-08
802	3.104e-09	1e-09	1e-09	1e-09	1e-09	7e-09	3.991e-10	1e-09	2.869e-07	1e-09	8.6e-08
801	3.1174e-09	1e-09	1e-09	1e-09	1e-09	7e-09	4.004e-10	1e-09	2.875e-07	1e-09	8.6e-08
800	3.1321e-09	1e-09	1e-09	1e-09	1e-09	7e-09	4.018e-10	1e-09	2.881e-07	1e-09	8.6e-08
799	3.1467e-09	1e-09	1e-09	1e-09	1e-09	7e-09	4.031e-10	1e-09	2.888e-07	1e-09	8.6e-08
798	3.1623e-09	1e-09	1e-09	1e-09	1e-09	7e-09	4.045e-10	1e-09	2.894e-07	1e-09	8.6e-08
797	3.1771e-09	1e-09	1e-09	1e-09	1e-09	7e-09	4.058e-10	1e-09	2.9e-07	1e-09	8.6e-08
796	3.1933e-09	1e-09	1e-09	1e-09	1e-09	7e-09	4.071e-10	1e-09	2.906e-07	1e-09	8.6e-08
795	3.2089e-09	1e-09	1e-09	1e-09	1e-09	7e-09	4.085e-10	1e-09	2.913e-07	1e-09	8.6e-08
794	3.2239e-09	1e-09	1e-09	1e-09	1e-09	7e-09	4.098e-10	1e-09	2.919e-07	1e-09	8.6e-08
793	3.2426e-09	1e-09	1e-09	1e-09	1e-09	7e-09	4.112e-10	1e-09	2.925e-07	1e-09	8.6e-08
792	3.2587e-09	1e-09	1e-09	1e-09	1e-09	7e-09	4.125e-10	1e-09	2.931e-07	1e-09	8.6e-08
791	3.278e-09	1e-09	1e-09	1e-09	1e-09	7e-09	4.138e-10	1e-09	2.938e-07	1e-09	8.6e-08
790	3.2965e-09	1e-09	1e-09	1e-09	1e-09	7e-09	4.152e-10	1e-09	2.944e-07	1e-09	8.6e-08
789	3.3155e-09	1e-09	1e-09	1e-09	1e-09	7e-09	4.165e-10	1e-09	2.95e-07	1e-09	8.6e-08
788	3.3323e-09	1e-09	1e-09	1e-09	1e-09	7e-09	4.179e-10	1e-09	2.957e-07	1e-09	8.6e-08
787	3.3506e-09	1e-09	1e-09	1e-09	1e-09	7e-09	4.192e-10	1e-09	2.963e-07	1e-09	8.6e-08
786	3.3679e-09	1e-09	1e-09	1e-09	1e-09	7e-09	4.205e-10	1e-09	2.969e-07	1e-09	8.6e-08
785	3.3802e-09	1e-09	1e-09	1e-09	1e-09	7e-09	4.219e-10	1e-09	2.975e-07	1e-09	8.6e-08
784	3.3937e-09	1e-09	1e-09	1e-09	1e-09	7e-09	4.232e-10	1e-09	2.982e-07	1e-09	8.6e-08
783	3.4078e-09	1e-09	1e-09	1e-09	1e-09	7e-09	4.246e-10	1e-09	2.988e-07	1e-09	8.6e-08
782	3.4207e-09	1e-09	1e-09	1e-09	1e-09	7e-09	4.259e-10	1e-09	2.994e-07	1e-09	8.6e-08
781	3.4327e-09	1e-09	1e-09	1e-09	1e-09	7e-09	4.272e-10	1e-09	3e-07	1e-09	8.6e-08
780	3.4427e-09	1e-09	1e-09	1e-09	1e-09	7e-09	4.286e-10	1e-09	3.007e-07	1e-09	8.6e-08
779	3.4509e-09	1e-09	1e-09	1e-09	1e-09	7e-09	4.299e-10	1e-09	3.013e-07	1e-09	8.6e-08
778	3.4604e-09	1e-09	1e-09	1e-09	1e-09	7e-09	4.313e-10	1e-09	3.019e-07	1e-09	8.6e-08
777	3.4673e-09	1e-09	1e-09	1e-09	1e-09	7e-09	4.326e-10	1e-09	3.026e-07	1e-09	8.6e-08
776	3.4716e-09	1e-09	1e-09	1e-09	1e-09	7e-09	4.339e-10	1e-09	3.032e-07	1e-09	8.6e-08
775	3.4771e-09	1e-09	1e-09	1e-09	1e-09	7e-09	4.353e-10	1e-09	3.038e-07	1e-09	8.6e-08
774	3.4797e-09	1e-09	1e-09	1e-09	1e-09	7e-09	4.366e-10	1e-09	3.044e-07	1e-09	8.6e-08
773	3.4824e-09	1e-09	1e-09	1e-09	1e-09	7e-09	4.379e-10	1e-09	3.051e-07	1e-09	8.6e-08
772	3.481e-09	1e-09	1e-09	1e-09	1e-09	7e-09	4.393e-10	1e-09	3.057e-07	1e-09	8.6e-08
771	3.4795e-09	1e-09	1e-09	1e-09	1e-09	7e-09	4.406e-10	1e-09	3.063e-07	1e-09	8.6e-08
770	3.4757e-09	1e-09	1e-09	1e-09	1e-09	7e-09	4.42e-10	1e-09	3.069e-07	1e-09	8.6e-08
769	3.473e-09	1e-09	1e-09	1e-09	1e-09	7e-09	4.433e-10	1e-09	3.076e-07	1e-09	8.6e-08
768	3.4695e-09	1e-09	1e-09	1e-09	1e-09	7e-09	4.446e-10	1e-09	3.082e-07	1e-09	8.6e-08
767	3.4666e-09	1e-09	1e-09	1e-09	1e-09	7e-09	4.46e-10	1e-09	3.088e-07	1e-09	8.6e-08
766	3.4626e-09	1e-09	1e-09	1e-09	1e-09	7e-09	4.473e-10	1e-09	3.094e-07	1e-09	8.6e-08
765	3.4585e-09	1e-09	1e-09	1e-09	1e-09	7e-09	4.487e-10	1e-09	3.101e-07	1e-09	8.6e-08
764	3.452e-09	1e-09	1e-09	1e-09	1e-09	7e-09	4.5e-10	1e-09	3.107e-07	1e-09	8.6e-08
763	3.448e-09	1e-09	1e-09	1e-09	1e-09	7e-09	4.513e-10	1e-09	3.113e-07	1e-09	8.6e-08
762	3.4446e-09	1e-09	1e-09	1e-09	1e-09	7e-09	4.527e-10	1e-09	3.12e-07	1e-09	8.6e-08
761	3.4401e-09	1e-09	1e-09	1e-09	1e-09	7e-09	4.54e-10	1e-09	3.126e-07	1e-09	8.6e-08
760	3.4363e-09	1e-09	1e-09	1e-09	1e-09	7e-09	4.554e-10	1e-09	3.132e-07	1e-09	8.6e-08
759	3.4329e-09	1e-09	1e-09	1e-09	1e-09	7e-09	4.567e-10	1e-09	3.138e-07	1e-09	8.6e-08
758	3.427e-09	1e-09	1e-09	1e-09	1e-09	7e-09	4.58e-10	1e-09	3.145e-07	1e-09	8.6e-08
757	3.4217e-09	1e-09	1e-09	1e-09	1e-09	7e-09	4.594e-10	1e-09	3.151e-07	1e-09	8.6e-08
756	3.4144e-09	1e-09	1e-09	1e-09	1e-09	7e-09	4.607e-10	1e-09	3.157e-07	1e-09	8.6e-08
755	3.4075e-09	1e-09	1e-09	1e-09	1e-09	7e-09	4.621e-10	1e-09	3.163e-07	1e-09	8.6e-08
754	3.4001e-09	1e-09	1e-09	1e-09	1e-09	7e-09	4.634e-10	1e-09	3.17e-07	1e-09	8.6e-08
753	3.3957e-09	1e-09	1e-09	1e-09	1e-09	7e-09	4.647e-10	1e-09	3.176e-07	1e-09	8.6e-08
752	3.3873e-09	1e-09	1e-09	1e-09	1e-09	7e-09	4.661e-10	1e-09	3.182e-07	1e-09	8.6e-08
751	3.3797e-09	1e-09	1e-09	1e-09	1e-09	7e-09	4.674e-10	1e-09	3.189e-07	1e-09	8.6e-08
750	3.3719e-09	1e-09	1e-09	1e-09	1e-09	7e-09	4.688e-10	1e-09	3.195e-07	1e-09	8.6e-08
749	3.3634e-09	1e-09	1e-09	1e-09	1e-09	7e-09	4.701e-10	1e-09	3.201e-07	1e-09	8.6e-08
748	3.3545e-09	1e-09	1e-09	1e-09	1e-09	7e-09	4.714e-10	1e-09	3.207e-07	1e-09	8.6e-08
747	3.3494e-09	1e-09	1e-09	1e-09	1e-09	7e-09	4.728e-10	1e-09	3.214e-07	1e-09	8.6e-08
746	3.3404e-09	1e-09	1e-09	1e-09	1e-09	7e-09	4.741e-10	1e-09	3.22e-07	1e-09	8.6e-08
745	3.3295e-09	1e-09	1e-09	1e-09	1e-09	7e-09	4.754e-10	1e-09	3.226e-07	1e-09	8.6e-08
744	3.3176e-09	1e-09	1e-09	1e-09	1e-09	7e-09	4.768e-10	1e-09	3.232e-07	1e-09	8.6e-08
743	3.3031e-09	1e-09	1e-09	1e-09	1e-09	7e-09	4.781e-10	1e-09	3.239e-07	1e-09	8.6e-08
742	3.284e-09	1e-09	1e-09	1e-09	1e-09	7e-09	4.795e-10	1e-09	3.245e-07	1e-09	8.6e-08
741	3.2615e-09	1e-09	1e-09	1e-09	1e-09	7e-09	4.808e-10	1e-09	3.251e-07	1e-09	8.6e-08
740	3.2303e-09	1e-09	1e-09	1e-09	1e-09	7e-09	4.821e-10	1e-09	3.258e-07	1e-09	8.6e-08
739	3.19e-09	1e-09	1e-09	1e-09	1e-09	7e-09	4.835e-10	1e-09	3.264e-07	1e-09	8.6e-08
738	3.1394e-09	1e-09	1e-09	1e-09	1e-09	7e-09	4.848e-10	1e-09	3.27e-07	1e-09	8.6e-08
737	3.0758e-09	1e-09	1e-09	1e-09	1e-09	7e-09	4.862e-10	1e-09	3.276e-07	1e-09	8.6e-08
736	2.9978e-09	1e-09	1e-09	1e-09	1e-09	7e-09	4.875e-10	1e-09	3.283e-07	1e-09	8.6e-08
735	2.9104e-09	1e-09	1e-09	1e-09	1e-09	7e-09	4.888e-10	1e-09	3.289e-07	1e-09	8.6e-08
734	2.8112e-09	1e-09	1e-09	1e-09	1e-09	7e-09	4.902e-10	1e-09	3.295e-07	1e-09	8.6e-08
733	2.704e-09	1e-09	1e-09	1e-09	1e-09	7e-09	4.915e-10	1e-09	3.301e-07	1e-09	8.6e-08
732	2.5898e-09	1e-09	1e-09	1e-09	1e-09	7e-09	4.929e-10	1e-09	3.308e-07	1e-09	8.6e-08
731	2.4753e-09	1e-09	1e-09	1e-09	1e-09	7e-09	4.942e-10	1e-09	3.314e-07	1e-09	8.6e-08
730	2.3578e-09	1e-09	1e-09	1e-09	1e-09	7e-09	4.955e-10	1e-09	3.32e-07	1e-09	8.6e-08
729	2.2455e-09	1e-09	1e-09	1e-09	1e-09	7e-09	4.969e-10	1e-09	3.327e-07	1e-09	8.6e-08
728	2.1421e-09	1e-09	1e-09	1e-09	1e-09	7e-09	4.982e-10	1e-09	3.333e-07	1e-09	8.6e-08
727	2.0476e-09	1e-09	1e-09	1e-09	1e-09	7e-09	4.996e-10	1e-09	3.339e-07	1e-09	8.6e-08
726	1.9589e-09	1e-09	1e-09	1e-09	1e-09	7e-09	5.009e-10	1e-09	3.345e-07	1e-09	8.6e-08
725	1.8774e-09	1e-09	1e-09	1e-09	1e-09	7e-09	5.022e-10	1e-09	3.352e-07	1e-09	8.6e-08
724	1.8027e-09	1e-09	1e-09	1e-09	1e-09	7e-09	5.036e-10	1e-09	3.358e-07	1e-09	8.6e-08
723	1.7358e-09	1e-09	1e-09	1e-09	1e-09	7e-09	5.049e-10	1e-09	3.364e-07	1e-09	8.6e-08
722	1.6737e-09	1e-09	1e-09	1e-09	1e-09	7e-09	5.063e-10	1e-09	3.37e-07	1e-09	8.6e-08
721	1.6138e-09	1e-09	1e-09	1e-09	1e-09	7e-09	5.076e-10	1e-09	3.377e-07	1e-09	8.6e-08
720	1.5578e-09	1e-09	1e-09	1e-09	1e-09	7e-09	5.089e-10	1e-09	3.383e-07	1e-09	8.6e-08
719	1.5016e-09	1e-09	1e-09	1e-09	1e-09	7e-09	5.103e-10	1e-09	3.389e-07	1e-09	8.6e-08
718	1.4477e-09	1e-09	1e-09	1e-09	1e-09	7e-09	5.116e-10	1e-09	3.395e-07	1e-09	8.6e-08
717	1.3963e-09	1e-09	1e-09	1e-09	1e-09	7e-09	5.129e-10	1e-09	3.402e-07	1e-09	8.6e-08
716	1.3476e-09	1e-09	1e-09	1e-09	1e-09	7e-09	5.143e-10	1e-09	3.408e-07	1e-09	8.6e-08
715	1.3021e-09	1e-09	1e-09	1e-09	1e-09	7e-09	5.156e-10	1e-09	3.414e-07	1e-09	8.6e-08
714	1.2549e-09	1e-09	1e-09	1e-09	1e-09	7e-09	5.17e-10	1e-09	3.421e-07	1e-09	8.6e-08
713	1.2129e-09	1e-09	1e-09	1e-09	1e-09	7e-09	5.183e-10	1e-09	3.427e-07	1e-09	8.6e-08
712	1.1739e-09	1e-09	1e-09	1e-09	1e-09	7e-09	5.196e-10	1e-09	3.433e-07	1e-09	8.6e-08
711	1.1361e-09	1e-09	1e-09	1e-09	1e-09	7e-09	5.21e-10	1e-09	3.439e-07	1e-09	8.6e-08
710	1.0995e-09	1e-09	1e-09	1e-09	1e-09	7e-09	5.223e-10	1e-09	3.446e-07	1e-09	8.6e-08
709	1.0649e-09	1e-09	1e-09	1e-09	1e-09	7e-09	5.237e-10	1e-09	3.452e-07	1e-09	8.6e-08
708	1.0339e-09	1e-09	1e-09	1e-09	1e-09	7e-09	5.25e-10	1e-09	3.458e-07	1e-09	8.6e-08
707	1.0048e-09	1e-09	1e-09	1e-09	1e-09	7e-09	5.263e-10	1e-09	3.464e-07	1e-09	8.6e-08
706	9.78e-10	1e-09	1e-09	1e-09	1e-09	7e-09	5.277e-10	1e-09	3.471e-07	1e-09	8.6e-08
705	9.525e-10	1e-09	1e-09	1e-09	1e-09	7e-09	5.29e-10	1e-09	3.477e-07	1e-09	8.6e-08
704	9.28e-10	1e-09	1e-09	1e-09	1e-09	7e-09	5.304e-10	1e-09	3.483e-07	1e-09	8.6e-08
703	9.046e-10	1e-09	1e-09	1e-09	1e-09	7e-09	5.317e-10	1e-09	3.49e-07	1e-09	8.6e-08
702	8.85e-10	1e-09	1e-09	1e-09	1e-09	7e-09	5.33e-10	1e-09	3.496e-07	1e-09	8.6e-08
701	8.653e-10	1e-09	1e-09	1e-09	1e-09	7e-09	5.344e-10	1e-09	3.502e-07	1e-09	8.6e-08
700	8.483e-10	1e-10	1e-09	1e-09	1e-09	7e-09	5.357e-10	1e-09	3.508e-07	1e-09	8.6e-08
699	8.312e-10	1e-09	1e-09	1e-09	1e-09	7e-09	5.371e-10	1e-09	3.515e-07	1e-09	8.6e-08
698	8.125e-10	1e-09	1e-09	1e-09	1e-09	7e-09	5.384e-10	1e-09	3.521e-07	1e-09	8.6e-08
697	7.973e-10	1e-09	1e-09	1e-09	1e-09	7e-09	5.397e-10	1e-09	3.527e-07	1e-09	8.6e-08
696	7.822e-10	1e-09	1e-09	1e-09	1e-09	7e-09	5.411e-10	1e-09	3.533e-07	1e-09	8.6e-08
695	7.668e-10	1e-09	1e-09	1e-09	1e-09	7e-09	5.424e-10	1e-09	3.54e-07	1e-09	8.6e-08
694	7.527e-10	1e-09	1e-09	1e-09	1e-09	7e-09	5.438e-10	1e-09	3.546e-07	1e-09	8.6e-08
693	7.389e-10	1e-09	1e-09	1e-09	1e-09	7e-09	5.451e-10	1e-09	3.552e-07	1e-09	8.6e-08
692	7.268e-10	1e-09	1e-09	1e-09	1e-09	7e-09	5.464e-10	1e-09	3.559e-07	1e-09	8.6e-08
691	7.152e-10	1e-09	1e-09	1e-09	1e-09	7e-09	5.478e-10	1e-09	3.565e-07	1e-09	8.6e-08
690	7.036e-10	1e-09	1e-09	1e-09	1e-09	7e-09	5.491e-10	1e-09	3.571e-07	1e-09	8.6e-08
689	6.909e-10	1e-09	1e-09	1e-09	1e-09	7e-09	5.504e-10	1e-09	3.577e-07	1e-09	8.6e-08
688	6.786e-10	1e-09	1e-09	1e-09	1e-09	7e-09	5.518e-10	1e-09	3.584e-07	1e-09	8.6e-08
687	6.669e-10	1e-09	1e-09	1e-09	1e-09	7e-09	5.531e-10	1e-09	3.59e-07	1e-09	8.6e-08
686	6.566e-10	1e-09	1e-09	1e-09	1e-09	7e-09	5.545e-10	1e-09	3.596e-07	1e-09	8.6e-08
685	6.459e-10	1e-09	1e-09	1e-09	1e-09	7e-09	5.558e-10	1e-09	3.602e-07	1e-09	8.6e-08
684	6.364e-10	1e-09	1e-09	1e-09	1e-09	7e-09	5.571e-10	1e-09	3.609e-07	1e-09	8.6e-08
683	6.266e-10	1e-09	1e-09	1e-09	1e-09	7e-09	5.585e-10	1e-09	3.615e-07	1e-09	8.6e-08
682	6.168e-10	1e-09	1e-09	1e-09	1e-09	7e-09	5.598e-10	1e-09	3.621e-07	1e-09	8.6e-08
681	6.103e-10	4e-10	1e-09	1e-09	1e-09	7e-09	5.612e-10	1e-09	3.628e-07	1e-09	8.6e-08
680	6.034e-10	9e-10	1e-09	1e-09	1e-09	7e-09	5.625e-10	1e-09	3.634e-07	1e-09	8.6e-08
679	5.976e-10	6e-10	1e-09	1e-09	1e-09	7e-09	5.638e-10	1e-09	3.64e-07	1e-09	8.6e-08
678	5.918e-10	4e-10	1e-09	1e-09	1e-09	7e-09	5.652e-10	1e-09	3.646e-07	1e-09	8.6e-08
677	5.877e-10	4e-10	1e-09	1e-09	1e-09	7e-09	5.665e-10	1e-09	3.653e-07	1e-09	8.6e-08
676	5.857e-10	1e-10	1e-09	1e-09	1e-09	7e-09	5.679e-10	1e-09	3.659e-07	1e-09	8.6e-08
675	5.826e-10	2e-10	1e-09	1e-09	1e-09	7e-09	5.692e-10	1e-09	3.665e-07	1e-09	8.6e-08
674	5.806e-10	9e-10	1e-09	1e-09	1e-09	7e-09	5.705e-10	1e-09	3.671e-07	1e-09	8.6e-08
673	5.797e-10	1.5e-09	1e-09	1e-09	1e-09	7e-09	5.719e-10	1e-09	3.678e-07	1e-09	8.6e-08
672	5.796e-10	1.8e-09	1e-09	1e-09	1e-09	7e-09	5.732e-10	1e-09	3.684e-07	1e-09	8.6e-08
671	5.807e-10	2.2e-09	1e-09	1e-09	1e-09	7e-09	5.746e-10	1e-09	3.69e-07	1e-09	8.6e-08
670	5.81e-10	2.5e-09	1e-09	1e-09	1e-09	7e-09	5.759e-10	1e-09	3.696e-07	1e-09	8.6e-08
669	5.818e-10	3e-09	1e-09	1e-09	1e-09	7e-09	5.772e-10	1e-09	3.703e-07	1e-09	8.6e-08
668	5.824e-10	3.6e-09	1e-09	1e-09	1e-09	7e-09	5.786e-10	1e-09	3.709e-07	1e-09	8.6e-08
667	5.85e-10	4.6e-09	1e-09	1e-09	1e-09	7e-09	5.799e-10	1e-09	3.715e-07	1e-09	8.6e-08
666	5.794e-10	3.2e-09	1e-09	1e-09	1e-09	7e-09	5.813e-10	1e-09	3.722e-07	1e-09	8.6e-08
665	6.199e-10	1.25e-08	1e-09	1e-09	1e-09	7e-09	5.826e-10	1e-09	3.728e-07	1e-09	8.6e-08
664	5.645e-10	1.31e-08	1e-09	1e-09	1e-09	7e-09	5.839e-10	1e-09	3.734e-07	1e-09	8.6e-08
663	5.671e-10	4.1e-09	1e-09	1e-09	1e-09	7e-09	5.853e-10	1e-09	3.74e-07	1e-09	8.6e-08
662	5.601e-10	1e-09	1e-09	1e-09	1e-09	7e-09	5.866e-10	1e-09	3.747e-07	1e-09	8.6e-08
661	5.544e-10	1e-09	1e-09	1e-09	1e-09	7e-09	5.879e-10	1e-09	3.753e-07	1e-09	8.6e-08
660	5.483e-10	1e-09	1e-09	1e-09	1e-09	7e-09	5.893e-10	1e-09	3.759e-07	1e-09	8.6e-08
659	5.396e-10	1e-09	1e-09	1e-09	1e-09	7e-09	5.906e-10	1e-09	3.765e-07	1e-09	8.6e-08
658	5.334e-10	1e-09	1e-09	1e-09	1e-09	7e-09	5.92e-10	1e-09	3.772e-07	1e-09	8.6e-08
657	5.25e-10	1e-09	1e-09	1e-09	1e-09	7e-09	5.933e-10	1e-09	3.778e-07	1e-09	8.6e-08
656	5.149e-10	1e-09	1e-09	1e-09	1e-09	7e-09	5.946e-10	1e-09	3.784e-07	1e-09	8.6e-08
655	5.041e-10	1e-09	1e-09	1e-09	1e-09	7e-09	5.96e-10	1e-09	3.791e-07	1e-09	8.6e-08
654	4.941e-10	1e-09	1e-09	1e-09	1e-09	7e-09	5.973e-10	1e-09	3.797e-07	1e-09	8.6e-08
653	4.915e-10	1e-09	1e-09	1e-09	1e-09	7e-09	5.987e-10	1e-09	3.803e-07	1e-09	8.6e-08
652	4.907e-10	1e-09	1e-09	1e-09	1e-09	7e-09	6e-10	1e-09	3.809e-07	1e-09	8.6e-08
651	4.859e-10	1e-09	1e-09	1e-09	1e-09	7e-09	6.013e-10	1e-09	3.816e-07	1e-09	8.6e-08
650	4.773e-10	6.2e-09	1e-09	1e-09	1e-09	7e-09	6.027e-10	1e-09	3.822e-07	1e-09	8.6e-08
649	4.835e-10	1.66e-08	1e-09	1e-09	1e-09	7e-09	6.04e-10	1e-09	3.828e-07	1e-09	8.6e-08
648	4.196e-10	1.15e-08	1e-09	1e-09	1e-09	7e-09	6.054e-10	1e-09	3.834e-07	1e-09	8.6e-08
647	4.448e-10	4.5e-09	1e-09	1e-09	1e-09	7e-09	6.067e-10	1e-09	3.841e-07	1e-09	8.6e-08
646	4.358e-10	3.5e-09	1e-09	1e-09	1e-09	7e-09	6.08e-10	1e-09	3.847e-07	1e-09	8.6e-08
645	4.297e-10	1.7e-09	1e-09	1e-09	1e-09	7e-09	6.094e-10	1e-09	3.853e-07	1e-09	8.6e-08
644	4.228e-10	1e-09	1e-09	1e-09	1e-09	7e-09	6.107e-10	1e-09	3.86e-07	1e-09	8.6e-08
643	4.165e-10	1e-09	1e-09	1e-09	1e-09	7e-09	6.121e-10	1e-09	3.866e-07	1e-09	8.6e-08
642	4.146e-10	1e-09	1e-09	1e-09	1e-09	7e-09	6.134e-10	1e-09	3.872e-07	1e-09	8.6e-08
641	4.17e-10	1e-09	1e-09	1e-09	1e-09	7e-09	6.147e-10	1e-09	3.878e-07	1e-09	8.6e-08
640	4.154e-10	1e-09	1e-09	1e-09	1e-09	7e-09	6.161e-10	1e-09	3.885e-07	1e-09	8.6e-08
639	4.081e-10	1e-09	1e-09	1e-09	1e-09	7e-09	6.174e-10	1e-09	3.891e-07	1e-09	8.6e-08
638	4.02e-10	1e-09	1e-09	1e-09	1e-09	7e-09	6.188e-10	1e-09	3.897e-07	1e-09	8.6e-08
637	4.19e-10	1e-09	1e-09	1e-09	1e-09	7e-09	6.201e-10	1e-09	3.903e-07	1e-09	8.6e-08
636	4.405e-10	3.2e-09	1e-09	1e-09	1e-09	7e-09	6.214e-10	1e-09	3.91e-07	1e-09	8.6e-08
635	4.445e-10	7.7e-09	1e-09	1e-09	1e-09	7e-09	6.228e-10	1e-09	3.916e-07	1e-09	8.6e-08
634	4.419e-10	1.21e-08	1e-09	1e-09	1e-09	7e-09	6.241e-10	1e-09	3.922e-07	1e-09	8.6e-08
633	4.418e-10	1.47e-08	1e-09	1e-09	1e-09	7e-09	6.254e-10	1e-09	3.929e-07	1e-09	8.6e-08
632	4.389e-10	1.37e-08	1e-09	1e-09	1e-09	7e-09	6.268e-10	1e-09	3.935e-07	1e-09	8.6e-08
631	4.342e-10	1.15e-08	1e-09	1e-09	1e-09	7e-09	6.281e-10	1e-09	3.941e-07	1e-09	8.6e-08
630	4.296e-10	8.2e-09	1e-09	1e-09	1e-09	7e-09	6.295e-10	1e-09	3.947e-07	1e-09	8.6e-08
629	4.212e-10	4.5e-09	1e-09	1e-09	1e-09	7e-09	6.308e-10	1e-09	3.954e-07	1e-09	8.6e-08
628	4.144e-10	1.4e-09	1e-09	1e-09	1e-09	7e-09	6.321e-10	1e-09	3.96e-07	1e-09	8.6e-08
627	4.082e-10	1e-09	1e-09	1e-09	1e-09	7e-09	6.335e-10	1e-09	3.966e-07	1e-09	8.6e-08
626	4.024e-10	1e-09	1e-09	1e-09	1e-09	7e-09	6.348e-10	1e-09	3.972e-07	1e-09	8.6e-08
625	3.97e-10	1e-09	1e-09	1e-09	1e-09	7e-09	6.362e-10	1e-09	3.979e-07	1e-09	8.6e-08
624	3.838e-10	1e-09	1e-09	1e-09	1e-09	7e-09	6.375e-10	1e-09	3.985e-07	1e-09	8.6e-08
623	3.684e-10	1e-09	1e-09	1e-09	1e-09	7e-09	6.388e-10	1e-09	3.991e-07	1e-09	8.6e-08
622	3.659e-10	1e-09	1e-09	1e-09	1e-09	7e-09	6.402e-10	1e-09	3.997e-07	1e-09	8.6e-08
621	3.817e-10	1e-09	1e-09	1e-09	1e-09	7e-09	6.415e-10	1e-09	4.004e-07	1e-09	8.6e-08
620	3.887e-10	1e-09	1e-09	1e-09	1e-09	7e-09	6.429e-10	1e-09	4.01e-07	1e-09	8.6e-08
619	3.809e-10	1e-09	1e-09	1e-09	1e-09	7e-09	6.442e-10	1e-09	4.016e-07	1e-09	8.6e-08
618	3.743e-10	1e-09	1e-09	1e-09	1e-09	7e-09	6.455e-10	1e-09	4.023e-07	1e-09	8.6e-08
617	3.735e-10	1e-09	1e-09	1e-09	1e-09	7e-09	6.469e-10	1e-09	4.029e-07	1e-09	8.6e-08
616	3.722e-10	1e-09	1e-09	1e-09	1e-09	7e-09	6.482e-10	1e-09	4.035e-07	1e-09	8.6e-08
615	3.687e-10	1e-09	1e-09	1e-09	1e-09	7e-09	6.496e-10	1e-09	4.041e-07	1e-09	8.6e-08
614	3.672e-10	1e-09	1e-09	1e-09	1e-09	7e-09	6.509e-10	1e-09	4.048e-07	1e-09	8.6e-08
613	3.692e-10	1e-09	1e-09	1e-09	1e-09	7e-09	6.522e-10	1e-09	4.054e-07	1e-09	8.6e-08
612	3.741e-10	1e-09	1e-09	1e-09	1e-09	7e-09	6.536e-10	1e-09	4.06e-07	1e-09	8.6e-08
611	3.758e-10	1e-09	1e-09	1e-09	1e-09	7e-09	6.549e-10	1e-09	4.066e-07	1e-09	8.6e-08
610	3.793e-10	1e-09	1e-09	1e-09	1e-09	7e-09	6.563e-10	1e-09	4.073e-07	1e-09	8.6e-08
609	3.854e-10	1e-09	1e-09	1e-09	1e-09	7e-09	6.576e-10	1e-09	4.079e-07	1e-09	8.6e-08
608	3.906e-10	1e-09	1e-09	1e-09	1e-09	7e-09	6.589e-10	1e-09	4.085e-07	1e-09	8.6e-08
607	3.895e-10	1e-09	1e-09	1e-09	1e-09	7e-09	6.603e-10	1e-09	4.092e-07	1e-09	8.6e-08
606	3.966e-10	1e-09	1e-09	1e-09	1e-09	7e-09	6.616e-10	1e-09	4.098e-07	1e-09	8.6e-08
605	4.006e-10	1e-09	1e-09	1e-09	1e-09	7e-09	6.629e-10	1e-09	4.104e-07	1e-09	8.6e-08
604	4.002e-10	1e-09	1e-09	1e-09	1e-09	7e-09	6.643e-10	1e-09	4.11e-07	1e-09	8.6e-08
603	3.948e-10	1e-09	1e-09	1e-09	1e-09	7e-09	6.656e-10	1e-09	4.117e-07	1e-09	8.6e-08
602	3.874e-10	1e-09	1e-09	1e-09	1e-09	7e-09	6.67e-10	1e-09	4.123e-07	1e-09	8.6e-08
601	3.745e-10	1e-09	1e-09	1e-09	1e-09	7e-09	6.683e-10	1e-09	4.129e-07	1e-09	8.6e-08
600	3.601e-10	1e-09	1e-09	1e-09	1e-09	7e-09	6.696e-10	1e-09	4.135e-07	1e-09	8.6e-08
599	3.455e-10	1e-09	1e-09	1e-09	1e-09	7e-09	6.71e-10	1e-09	4.142e-07	1e-09	8.6e-08
598	3.34e-10	1e-09	1e-09	1e-09	1e-09	7e-09	6.723e-10	1e-09	4.148e-07	1e-09	8.6e-08
597	3.228e-10	1e-09	1e-09	1e-09	1e-09	7e-09	6.737e-10	1e-09	4.154e-07	1e-09	8.6e-08
596	3.058e-10	1e-09	1e-09	1e-09	1e-09	7e-09	6.75e-10	1e-09	4.161e-07	1e-09	8.6e-08
595	2.858e-10	1e-09	1e-09	1e-09	1e-09	7e-09	6.763e-10	1e-09	4.167e-07	1e-09	8.6e-08
594	2.779e-10	1e-09	1e-09	1e-09	1e-09	7e-09	6.777e-10	1e-09	4.173e-07	1e-09	8.6e-08
593	2.7e-10	1e-09	1e-09	1e-09	1e-09	7e-09	6.79e-10	1e-09	4.179e-07	1e-09	8.6e-08
592	2.703e-10	1e-09	1e-09	1e-09	1e-09	7e-09	6.804e-10	1e-09	4.186e-07	1e-09	8.6e-08
591	2.733e-10	1e-09	1e-09	1e-09	1e-09	7e-09	6.817e-10	1e-09	4.192e-07	1e-09	8.6e-08
590	2.744e-10	1e-09	1e-09	1e-09	1e-09	7e-09	6.83e-10	1e-09	4.198e-07	1e-09	8.6e-08
589	2.744e-10	1e-09	1e-09	1e-09	1e-09	7e-09	6.844e-10	1e-09	4.204e-07	1e-09	8.6e-08
588	2.794e-10	1e-09	1e-09	1e-09	1e-09	7e-09	6.857e-10	1e-09	4.211e-07	1e-09	8.6e-08
587	2.871e-10	1e-09	1e-09	1e-09	1e-09	7e-09	6.871e-10	1e-09	4.217e-07	1e-09	8.6e-08
586	2.934e-10	1e-09	1e-09	1e-09	1e-09	7e-09	6.884e-10	1e-09	4.223e-07	1e-09	8.6e-08
585	2.974e-10	1e-09	1e-09	1e-09	1e-09	7e-09	6.897e-10	1e-09	4.23e-07	1e-09	8.6e-08
584	3.093e-10	1e-09	1e-09	1e-09	1e-09	7e-09	6.911e-10	1e-09	4.236e-07	1e-09	8.6e-08
583	3.194e-10	1e-09	1e-09	1e-09	1e-09	7e-09	6.924e-10	1e-09	4.242e-07	1e-09	8.6e-08
582	3.217e-10	1e-09	1e-09	1e-09	1e-09	7e-09	6.938e-10	1e-09	4.248e-07	1e-09	8.6e-08
581	3.212e-10	1e-09	1e-09	1e-09	2.4e-09	7e-09	6.951e-10	1e-09	4.255e-07	1e-09	8.6e-08
580	3.159e-10	1e-09	1e-09	1e-09	4.1e-09	7e-09	6.964e-10	1e-09	4.261e-07	1e-09	8.6e-08
579	3.096e-10	1e-09	1e-09	1e-09	5.9e-09	7e-09	6.978e-10	1e-09	4.267e-07	1e-09	8.6e-08
578	3.121e-10	1e-09	1e-09	1e-09	7.6e-09	7e-09	6.991e-10	1e-09	4.273e-07	1e-09	8.6e-08
577	3.089e-10	1e-09	1e-09	1e-09	9.5e-09	7e-09	7.004e-10	1e-09	4.28e-07	1e-09	8.6e-08
576	3.109e-10	1e-09	1e-09	1e-09	1.12e-08	7e-09	7.018e-10	1e-09	4.286e-07	1e-09	8.6e-08
575	3.043e-10	1e-09	1e-09	1e-09	1.29e-08	7e-09	7.031e-10	1e-09	4.292e-07	1e-09	8.6e-08
574	2.883e-10	1e-09	1e-09	1e-09	1.45e-08	7e-09	7.045e-10	1e-09	4.298e-07	1e-09	8.6e-08
573	2.801e-10	1e-09	1e-09	1e-09	1.52e-08	7e-09	7.058e-10	1e-09	4.305e-07	1e-09	8.6e-08
572	2.711e-10	1e-09	1e-09	1e-09	1.54e-08	7e-09	7.071e-10	1e-09	4.311e-07	1e-09	8.6e-08
571	2.596e-10	1e-09	1e-09	1e-09	1.49e-08	7e-09	7.085e-10	1e-09	4.317e-07	1e-09	8.6e-08
570	2.461e-10	1e-09	1e-09	1e-09	1.34e-08	7e-09	7.098e-10	1e-09	4.324e-07	1e-09	8.6e-08
569	2.325e-10	1e-09	1e-09	1e-09	1.24e-08	7e-09	7.112e-10	1e-09	4.33e-07	1e-09	8.6e-08
568	2.206e-10	1e-09	1e-09	1e-09	1.16e-08	7e-09	7.125e-10	1e-09	4.336e-07	1e-09	8.6e-08
567	2.086e-10	1e-09	1e-09	1e-09	1.1e-08	7e-09	7.138e-10	1e-09	4.342e-07	1e-09	8.6e-08
566	1.959e-10	1e-09	1e-09	1e-09	1e-08	7e-09	7.152e-10	1e-09	4.349e-07	1e-09	8.6e-08
565	1.875e-10	1e-09	1e-09	1e-09	9.1e-09	7e-09	7.165e-10	1e-09	4.355e-07	1e-09	8.6e-08
564	1.787e-10	1e-09	1e-09	1e-09	8.4e-09	7e-09	7.179e-10	1e-09	4.361e-07	1e-09	8.6e-08
563	1.712e-10	1e-09	1e-09	1e-09	7.5e-09	7e-09	7.192e-10	1e-09	4.367e-07	1e-09	8.6e-08
562	1.686e-10	1e-09	1e-09	1e-09	7.3e-09	7e-09	7.205e-10	1e-09	4.374e-07	1e-09	8.6e-08
561	1.659e-10	4e-10	1e-09	1e-09	7.1e-09	7e-09	7.219e-10	1e-09	4.38e-07	1e-09	8.6e-08
560	1.632e-10	5e-10	1e-09	1e-09	7e-09	7e-09	7.232e-10	1e-09	4.386e-07	1e-09	8.6e-08
559	1.598e-10	2e-10	1e-09	1e-09	7.2e-09	7e-09	7.246e-10	1e-09	4.393e-07	1e-09	8.6e-08
558	1.555e-10	1e-10	1e-09	1e-09	7.4e-09	7e-09	7.259e-10	1e-09	4.399e-07	1e-09	8.6e-08
557	1.527e-10	3e-10	1e-09	1e-09	7.4e-09	7e-09	7.272e-10	1e-09	4.405e-07	1e-09	8.6e-08
556	1.484e-10	5e-10	1e-09	1e-09	7.7e-09	7e-09	7.286e-10	1e-09	4.411e-07	1e-09	8.6e-08
555	1.45e-10	3e-10	1e-09	1e-09	7.6e-09	7e-09	7.299e-10	1e-09	4.418e-07	1e-09	8.6e-08
554	1.405e-10	5e-10	1e-09	1e-09	7.6e-09	7e-09	7.313e-10	1e-09	4.424e-07	1e-09	8.6e-08
553	1.329e-10	6e-10	1e-09	1e-09	7.7e-09	7e-09	7.326e-10	1e-09	4.43e-07	1e-09	8.6e-08
552	1.262e-10	2e-10	1e-09	1e-09	7.6e-09	7e-09	7.339e-10	1e-09	4.436e-07	1e-09	8.6e-08
551	1.206e-10	1e-09	1e-09	1e-09	7.5e-09	7e-09	7.353e-10	1e-09	4.443e-07	1e-09	8.6e-08
550	1.143e-10	1e-09	1e-09	1e-09	7e-09	7e-09	7.366e-10	1e-09	4.449e-07	1e-09	8.6e-08
549	1.066e-10	1e-09	1e-09	1e-09	6.9e-09	7e-09	7.379e-10	1e-09	4.455e-07	1e-09	8.6e-08
548	9.99e-11	1e-09	1e-09	1e-09	6.6e-09	7e-09	7.393e-10	1e-09	4.462e-07	1e-09	8.6e-08
547	9.27e-11	1e-09	1e-09	1e-09	6.4e-09	7e-09	7.406e-10	1e-09	4.468e-07	1e-09	8.6e-08
546	8.49e-11	1e-09	1e-09	1e-09	6.4e-09	7e-09	7.42e-10	1e-09	4.474e-07	1e-09	8.6e-08
545	7.77e-11	1e-09	1e-09	1e-09	5.9e-09	7e-09	7.433e-10	1e-09	4.48e-07	1e-09	8.6e-08
544	6.95e-11	1e-09	1e-09	1e-09	5.6e-09	7e-09	7.446e-10	1e-09	4.487e-07	1e-09	8.6e-08
543	6.12e-11	1e-09	1e-09	1e-09	5.3e-09	7e-09	7.46e-10	1e-09	4.493e-07	1e-09	8.6e-08
542	5.28e-11	1e-09	1e-09	1e-09	5e-09	7e-09	7.473e-10	1e-09	4.499e-07	1e-09	8.6e-08
541	4.72e-11	1e-09	1e-09	1e-09	4.7e-09	7e-09	7.487e-10	1e-09	4.505e-07	1e-09	8.6e-08
540	4.26e-11	1e-09	1e-09	1e-09	4.5e-09	7e-09	7.5e-10	1e-09	4.512e-07	1e-09	8.6e-08
539	3.78e-11	1e-09	1e-09	1e-09	4.3e-09	7e-09	7.513e-10	1e-09	4.518e-07	1e-09	8.6e-08
538	3.41e-11	1e-09	1e-09	1e-09	4.2e-09	7e-09	7.527e-10	1e-09	4.524e-07	1e-09	8.6e-08
537	3.08e-11	1e-09	1e-09	1e-09	4.1e-09	7e-09	7.54e-10	1e-09	4.531e-07	1e-09	8.6e-08
536	2.88e-11	1e-09	1e-09	1e-09	4.2e-09	7e-09	7.554e-10	1e-09	4.537e-07	1e-09	8.6e-08
535	2.68e-11	1e-09	1e-09	1e-09	4.2e-09	7e-09	7.567e-10	1e-09	4.543e-07	1e-09	8.6e-08
534	2.66e-11	1e-09	1e-09	1e-09	4.1e-09	7e-09	7.58e-10	1e-09	4.549e-07	1e-09	8.6e-08
533	2.46e-11	3e-10	1e-09	1e-09	4.5e-09	7e-09	7.594e-10	1e-09	4.556e-07	1e-09	8.6e-08
532	2.45e-11	6e-10	1e-09	1e-09	4.4e-09	7e-09	7.607e-10	1e-09	4.562e-07	1e-09	8.6e-08
531	2.21e-11	1.3e-09	1e-09	1e-09	4.7e-09	7e-09	7.621e-10	1e-09	4.568e-07	1e-09	8.6e-08
530	2.02e-11	1.4e-09	1e-09	1e-09	4.7e-09	7e-09	7.634e-10	1e-09	4.574e-07	1e-09	8.6e-08
529	1.7e-11	2e-09	1e-09	1e-09	4.7e-09	7e-09	7.647e-10	1e-09	4.581e-07	1e-09	8.6e-08
528	1.16e-11	2.7e-09	1e-09	1e-09	4.7e-09	7e-09	7.661e-10	1e-09	4.587e-07	1e-09	8.6e-08
527	5.3e-12	3e-09	1e-09	1e-09	4.6e-09	7e-09	7.674e-10	1e-09	4.593e-07	1e-09	8.6e-08
526	2.5e-12	2.9e-09	1e-09	1e-09	4.1e-09	7e-09	7.688e-10	1e-09	4.6e-07	1e-09	8.6e-08
525	-7e-13	2.3e-09	1e-09	1e-09	3.8e-09	7e-09	7.701e-10	1e-09	4.606e-07	1e-09	8.6e-08
524	-4.5e-12	2.2e-09	1e-09	1e-09	3.6e-09	7e-09	7.714e-10	1e-09	4.612e-07	1e-09	8.6e-08
523	-7.8e-12	2.3e-09	1e-09	1e-09	3.1e-09	7e-09	7.728e-10	1e-09	4.618e-07	1e-09	8.6e-08
522	-1.12e-11	1.5e-09	1e-09	1e-09	2.7e-09	7e-09	7.741e-10	1e-09	4.625e-07	1e-09	8.6e-08
521	-1.45e-11	1.7e-09	1e-09	1e-09	2.4e-09	7e-09	7.754e-10	1e-09	4.631e-07	1e-09	8.6e-08
520	-1.64e-11	8e-10	1e-09	1e-09	2.2e-09	7e-09	7.768e-10	1e-09	4.637e-07	1e-09	8.6e-08
519	-1.97e-11	8e-10	1e-09	1e-09	2.1e-09	7e-09	7.781e-10	1e-09	4.643e-07	1e-09	8.6e-08
518	-2.04e-11	4e-10	1e-09	1e-09	1.9e-09	7e-09	7.795e-10	1e-09	4.65e-07	1e-09	8.6e-08
517	-1.98e-11	1e-10	1e-09	1e-09	1.9e-09	7e-09	7.808e-10	1e-09	4.656e-07	1e-09	8.6e-08
516	-1.71e-11	1e-09	1e-09	1e-09	1.8e-09	7e-09	7.821e-10	1e-09	4.662e-07	1e-09	8.6e-08
515	-1.46e-11	1e-09	1e-09	1e-09	1.9e-09	7e-09	7.835e-10	1e-09	4.668e-07	1e-09	8.6e-08
514	-1.09e-11	1e-09	1e-09	1e-09	1.8e-09	7e-09	7.848e-10	1e-09	4.675e-07	1e-09	8.6e-08
513	-7.8e-12	1e-09	1e-09	1e-09	1.7e-09	7e-09	7.862e-10	1e-09	4.681e-07	1e-09	8.6e-08
512	-4.9e-12	1e-09	1e-09	1e-09	1.9e-09	7e-09	7.875e-10	1e-09	4.687e-07	1e-09	8.6e-08
511	-9e-13	1e-09	1e-09	1e-09	2.1e-09	7e-09	7.888e-10	1e-09	4.694e-07	1e-09	8.6e-08
510	4e-12	1e-09	1e-09	1e-09	2e-09	7e-09	7.902e-10	1e-09	4.7e-07	1e-09	8.6e-08
509	6.6e-12	1e-09	1e-09	1e-09	1.8e-09	7e-09	7.915e-10	1e-09	4.706e-07	1e-09	8.6e-08
508	9.2e-12	1e-09	1e-09	1e-09	1.8e-09	7e-09	7.929e-10	1e-09	4.712e-07	1e-09	8.6e-08
507	1.17e-11	1e-09	1e-09	1e-09	1.6e-09	7e-09	7.942e-10	1e-09	4.719e-07	1e-09	8.6e-08
506	1.16e-11	1e-09	1e-09	1e-09	1.6e-09	7e-09	7.955e-10	1e-09	4.725e-07	1e-09	8.6e-08
505	1.15e-11	1e-09	1e-09	1e-09	1.4e-09	7e-09	7.969e-10	1e-09	4.731e-07	1e-09	8.6e-08
504	1.12e-11	1e-09	1e-09	1e-09	1.3e-09	7e-09	7.982e-10	1e-09	4.737e-07	1e-09	8.6e-08
503	1e-11	1e-09	1e-09	1e-09	1.2e-09	7e-09	7.996e-10	1e-09	4.744e-07	1e-09	8.6e-08
502	1e-11	1e-09	1e-09	1e-09	1.2e-09	7e-09	8.009e-10	1e-09	4.75e-07	1e-09	8.6e-08
501	1e-11	1e-09	1e-09	1e-09	1.3e-09	7e-09	8.022e-10	1e-09	4.756e-07	1e-09	8.6e-08
500	1e-11	1e-09	1e-09	1e-09	1.3e-09	7e-09	8.036e-10	1e-09	4.763e-07	1e-09	8.6e-08
499	1e-11	1e-09	1e-09	1e-09	1.2e-09	7e-09	8.049e-10	1e-09	4.769e-07	1e-09	8.6e-08
498	1e-11	1e-09	1e-09	1e-09	1.1e-09	7e-09	8.063e-10	1e-09	4.775e-07	1e-09	8.6e-08
497	1e-11	1e-09	1e-09	1e-09	9e-10	7e-09	8.076e-10	1e-09	4.781e-07	1e-09	8.6e-08
496	1e-11	1e-09	1e-09	1e-09	1.2e-09	7e-09	8.089e-10	1e-09	4.788e-07	1e-09	8.6e-08
495	1e-11	1e-09	1e-09	1e-09	1.1e-09	7e-09	8.103e-10	1e-09	4.794e-07	1e-09	8.6e-08
494	1e-11	1e-09	1e-09	1e-09	1.9e-09	7e-09	8.116e-10	1e-09	4.8e-07	1e-09	8.6e-08
493	1e-11	1e-09	1e-09	1e-09	1.1e-09	7e-09	8.129e-10	1e-09	4.806e-07	1e-09	8.6e-08
492	1e-11	1e-09	1e-09	1e-09	1.5e-09	7e-09	8.143e-10	1e-09	4.813e-07	1e-09	8.6e-08
491	1e-11	1e-09	1e-09	1e-09	1.7e-09	7e-09	8.156e-10	1e-09	4.819e-07	1e-09	8.6e-08
490	1e-11	1e-09	1e-09	1e-09	2.1e-09	7e-09	8.17e-10	1e-09	4.825e-07	1e-09	8.6e-08
489	1e-11	1e-09	1e-09	1e-09	2.6e-09	7e-09	8.183e-10	1e-09	4.832e-07	1e-09	8.6e-08
488	1e-11	1e-09	1e-09	1e-09	3.1e-09	7e-09	8.196e-10	1e-09	4.838e-07	1e-09	8.6e-08
487	1e-11	1e-09	1e-09	1e-09	3.3e-09	7e-09	8.21e-10	1e-09	4.844e-07	1e-09	8.6e-08
486	1e-11	1e-09	1e-09	1e-09	3.4e-09	7e-09	8.223e-10	1e-09	4.85e-07	1e-09	8.6e-08
485	1e-11	1e-09	1e-09	1e-09	3.6e-09	7e-09	8.237e-10	1e-09	4.857e-07	1e-09	8.6e-08
484	1e-11	1e-09	1e-09	1e-09	3.7e-09	7e-09	8.25e-10	1e-09	4.863e-07	1e-09	8.6e-08
483	1e-11	1e-09	1e-09	1e-09	3.7e-09	7e-09	8.263e-10	1e-09	4.869e-07	1e-09	8.6e-08
482	1e-11	1e-09	1e-09	1e-09	3.7e-09	7e-09	8.277e-10	1e-09	4.875e-07	1e-09	8.6e-08
481	1e-11	1e-09	1e-09	1e-09	3.5e-09	7e-09	8.29e-10	1e-09	4.882e-07	1e-09	8.6e-08
480	1e-11	1e-09	1e-09	1e-09	3.1e-09	7e-09	8.304e-10	1e-09	4.888e-07	1e-09	8.6e-08
479	1e-11	1e-09	1e-09	1e-09	2.7e-09	7e-09	8.317e-10	1e-09	4.894e-07	1e-09	8.6e-08
478	1e-11	1e-09	1e-09	1e-09	2.6e-09	7e-09	8.33e-10	1e-09	4.901e-07	1e-09	8.6e-08
477	1e-11	1e-09	1e-09	1e-09	1.5e-09	7e-09	8.344e-10	1e-09	4.907e-07	1e-09	8.6e-08
476	1e-11	1e-09	1e-09	1e-09	1.9e-09	7e-09	8.357e-10	1e-09	4.913e-07	1e-09	8.6e-08
475	1e-11	1e-09	1e-09	1e-09	2e-09	7e-09	8.371e-10	1e-09	4.919e-07	1e-09	8.6e-08
474	1e-11	1e-09	1e-09	1e-09	1.9e-09	7e-09	8.384e-10	1e-09	4.926e-07	1e-09	8.6e-08
473	1e-11	1e-09	1e-09	1e-09	2.3e-09	7e-09	8.397e-10	1e-09	4.932e-07	1e-09	8.6e-08
472	1e-11	1e-09	1e-09	1e-09	2.5e-09	7e-09	8.411e-10	1e-09	4.938e-07	1e-09	8.6e-08
471	1e-11	1e-09	1e-09	1e-09	2.4e-09	7e-09	8.424e-10	1e-09	4.944e-07	1e-09	8.6e-08
470	1e-11	1e-09	1e-09	1e-09	2.3e-09	7e-09	8.438e-10	1e-09	4.951e-07	1e-09	8.6e-08
469	1e-11	1e-09	1e-09	1e-09	2.9e-09	7e-09	8.451e-10	1e-09	4.957e-07	1e-09	8.6e-08
468	1e-11	1e-09	1e-09	1e-09	3e-09	7e-09	8.464e-10	1e-09	4.963e-07	1e-09	8.6e-08
467	1e-11	1e-09	1e-09	1e-09	3.1e-09	7e-09	8.478e-10	1e-09	4.969e-07	1e-09	8.6e-08
466	1e-11	1e-09	1e-09	1e-09	3.4e-09	7e-09	8.491e-10	1e-09	4.976e-07	1e-09	8.6e-08
465	1e-11	1e-09	1e-09	1e-09	3.3e-09	7e-09	8.504e-10	1e-09	4.982e-07	1e-09	8.6e-08
464	1e-11	1e-09	1e-09	1e-09	3.4e-09	7e-09	8.518e-10	1e-09	4.988e-07	1e-09	8.6e-08
463	1e-11	1e-09	1e-09	1e-09	3.8e-09	7e-09	8.531e-10	1e-09	4.995e-07	1e-09	8.6e-08
462	1e-11	1e-09	1e-09	1e-09	4.1e-09	7e-09	8.545e-10	1e-09	5.001e-07	1e-09	8.6e-08
461	1e-11	1e-09	1e-09	1e-09	4.8e-09	7e-09	8.558e-10	1e-09	5.007e-07	1e-09	8.6e-08
460	1e-11	1e-09	1e-09	1e-09	4.9e-09	7e-09	8.571e-10	1e-09	5.013e-07	1e-09	8.6e-08
459	1e-11	1e-09	1e-09	1e-09	5e-09	7e-09	8.585e-10	1e-09	5.02e-07	1e-09	8.6e-08
458	1e-11	1e-09	1e-09	1e-09	5.1e-09	7e-09	8.598e-10	1e-09	5.026e-07	1e-09	8.58e-08
457	1e-11	1e-09	1e-09	1e-09	5.3e-09	7e-09	8.612e-10	1e-09	5.032e-07	1e-09	8.56e-08
456	1e-11	1e-09	1e-09	1e-09	5.2e-09	7e-09	8.625e-10	1e-09	5.038e-07	1e-09	8.6e-08
455	1e-11	1e-09	1e-09	1e-09	4.9e-09	7e-09	8.638e-10	1e-09	5.045e-07	1e-09	8.63e-08
454	1e-11	1e-09	1e-09	1e-09	4.3e-09	7e-09	8.652e-10	1e-09	5.051e-07	1e-09	8.65e-08
453	1e-11	1e-09	1e-09	1e-09	4.1e-09	7e-09	8.665e-10	1e-09	5.057e-07	1e-09	8.65e-08
452	1e-11	1e-09	1e-09	1e-09	3.3e-09	7e-09	8.679e-10	1e-09	5.064e-07	1e-09	8.66e-08
451	1e-11	1e-09	1e-09	1e-09	3e-09	7e-09	8.692e-10	1e-09	5.07e-07	1e-09	8.71e-08
450	1e-11	1e-09	1e-09	1e-09	3e-09	7e-09	8.705e-10	1e-09	5.076e-07	1e-09	8.73e-08
449	1e-11	1e-09	1e-09	1e-09	2.7e-09	7e-09	8.719e-10	1e-09	5.082e-07	1e-09	8.73e-08
448	1e-11	1e-09	1e-09	1e-09	3.1e-09	7e-09	8.732e-10	1e-09	5.089e-07	1e-09	8.77e-08
447	1e-11	1e-09	1e-09	1e-09	3.6e-09	7e-09	8.746e-10	1e-09	5.095e-07	1e-09	8.79e-08
446	1e-11	1e-09	1e-09	1e-09	3.8e-09	7e-09	8.759e-10	1e-09	5.101e-07	1e-09	8.83e-08
445	1e-11	1e-09	1e-09	1e-09	4.1e-09	7e-09	8.772e-10	1e-09	5.107e-07	1e-09	8.88e-08
444	1e-11	1e-09	1e-09	1e-09	4.3e-09	7e-09	8.786e-10	1e-09	5.114e-07	1e-09	8.92e-08
443	1e-11	1e-09	1e-09	1e-09	4.6e-09	7e-09	8.799e-10	1e-09	5.12e-07	1e-09	8.97e-08
442	1e-11	1e-09	1e-09	1e-09	5.1e-09	7e-09	8.813e-10	1e-09	5.126e-07	1e-09	8.94e-08
441	1e-11	1e-09	1e-09	1e-09	5.3e-09	7e-09	8.826e-10	1e-09	5.133e-07	1e-09	9.01e-08
440	1e-11	1e-09	1e-09	1e-09	5.5e-09	7e-09	8.839e-10	1e-09	5.139e-07	1e-09	9.14e-08
439	1e-11	1e-09	1e-09	1e-09	5.7e-09	7e-09	8.853e-10	1e-09	5.145e-07	1e-09	9.15e-08
438	1e-11	1e-09	1e-09	1e-09	5.4e-09	7e-09	8.866e-10	1e-09	5.151e-07	1e-09	9.13e-08
437	1e-11	1e-09	1e-09	1e-09	5.4e-09	7e-09	8.879e-10	1e-09	5.158e-07	1e-09	9.17e-08
436	1e-11	1e-09	1e-09	1e-09	5.5e-09	7e-09	8.893e-10	1e-09	5.164e-07	1e-09	9.21e-08
435	1e-11	1e-09	1e-09	1e-09	5.4e-09	7e-09	8.906e-10	1e-09	5.17e-07	1e-09	9.27e-08
434	1e-11	1e-09	1e-09	1e-09	5.6e-09	7e-09	8.92e-10	1e-09	5.176e-07	1e-09	9.25e-08
433	1e-11	1e-09	1e-09	1e-09	5.5e-09	7e-09	8.933e-10	1e-09	5.183e-07	1e-09	9.21e-08
432	1e-11	1e-09	1e-09	1e-09	5.9e-09	7e-09	8.946e-10	1e-09	5.189e-07	1e-09	9.23e-08
431	1e-11	1e-09	1e-09	1e-09	6.1e-09	7e-09	8.96e-10	1e-09	5.195e-07	1e-09	9.19e-08
430	1e-11	1e-09	1e-09	1e-09	6e-09	7e-09	8.973e-10	1e-09	5.202e-07	1e-09	9.11e-08
429	1e-11	1e-09	1e-09	1e-09	5.9e-09	7e-09	8.987e-10	1e-09	5.208e-07	1e-09	9.03e-08
428	1e-11	1e-09	1e-09	1e-09	5.9e-09	7e-09	9e-10	1e-09	5.214e-07	1e-09	8.98e-08
427	1e-11	1e-09	1e-09	1e-09	6.2e-09	7e-09	-1.2e-09	1e-09	5.22e-07	1e-09	8.94e-08
426	1e-11	1e-09	1e-09	1e-09	6.5e-09	7e-09	-2e-10	1e-09	5.227e-07	1e-09	8.89e-08
425	1e-11	1e-09	1e-09	1e-09	6.5e-09	7e-09	1e-10	1e-09	5.233e-07	1e-09	8.93e-08
424	1e-11	1e-09	1e-09	1e-09	6.4e-09	7e-09	8e-10	1e-09	5.239e-07	1e-09	8.93e-08
423	1e-11	1e-09	1e-09	1e-09	6.2e-09	7e-09	2.1e-09	1e-09	5.155e-07	1e-09	8.86e-08
422	1e-11	1e-09	1e-09	1e-09	5.8e-09	7e-09	4e-09	1e-09	5.146e-07	1e-09	8.86e-08
421	1e-11	1e-09	1e-09	1e-09	5.9e-09	7e-09	4.3e-09	1e-09	5.265e-07	1e-09	8.91e-08
420	1e-11	1e-09	1e-09	1e-09	6e-09	7e-09	5.3e-09	1e-09	5.084e-07	1e-09	8.96e-08
419	1e-11	1e-09	1e-09	1e-09	5.7e-09	7e-09	7.4e-09	1e-09	5.475e-07	1e-09	9.05e-08
418	1e-11	1e-09	1e-09	1e-09	6e-09	7e-09	9.1e-09	1e-09	5.748e-07	1e-09	9.09e-08
417	1e-11	1e-09	1e-09	1e-09	6.1e-09	7e-09	1.08e-08	1e-09	5.914e-07	1e-09	9.14e-08
416	1e-11	1e-09	1e-09	1e-09	6.4e-09	7e-09	1.26e-08	1e-09	5.983e-07	1e-09	9.19e-08
415	1e-11	1e-09	1e-09	1e-09	6.6e-09	7e-09	1.46e-08	1e-09	5.824e-07	1e-09	9.19e-08
414	1e-11	1e-09	1e-09	1e-09	6.5e-09	7e-09	1.7e-08	1e-09	5.774e-07	1e-09	9.15e-08
413	1e-11	1e-09	1e-09	1e-09	6.5e-09	7e-09	1.89e-08	1e-09	5.551e-07	1e-09	9.15e-08
412	1e-11	1e-09	1e-09	1e-09	6.8e-09	6.5e-09	2.1e-08	1e-09	5.238e-07	1e-09	9.18e-08
411	1e-11	1e-09	1e-09	1e-09	7e-09	6.1e-09	2.35e-08	1e-09	5.276e-07	1e-09	9.22e-08
410	1e-11	1e-09	1e-09	1e-09	7e-09	6e-09	2.64e-08	1e-09	5.386e-07	1e-09	9.26e-08
409	1e-11	1e-09	1e-09	2e-11	7.1e-09	6.6e-09	2.94e-08	1e-09	5.564e-07	1e-09	9.31e-08
408	1e-11	1e-09	1e-09	3e-11	7e-09	7.6e-09	3.24e-08	1e-09	5.82e-07	1e-09	9.37e-08
407	1e-11	1e-09	1e-09	4e-11	7.3e-09	9.1e-09	3.65e-08	1e-09	5.923e-07	1e-09	9.47e-08
406	1e-11	1e-09	1e-09	5e-11	7.4e-09	1.06e-08	4.16e-08	1e-09	5.932e-07	1e-09	9.51e-08
405	1e-11	1e-09	1e-09	6e-11	7.5e-09	1.2e-08	4.66e-08	1e-09	5.977e-07	1e-09	9.57e-08
404	1e-11	1e-09	1e-09	7e-11	7.7e-09	1.3e-08	5.24e-08	1e-09	6.058e-07	1e-09	9.65e-08
403	1e-11	1e-09	1e-09	8e-11	7.9e-09	1.39e-08	5.96e-08	1e-09	6.81e-07	1e-09	9.75e-08
402	1e-11	1e-09	1e-09	9e-11	8.2e-09	1.45e-08	6.83e-08	1e-09	7.013e-07	-4e-09	9.78e-08
401	1e-11	1e-09	1e-09	1e-10	8.6e-09	1.52e-08	7.86e-08	1e-09	7.056e-07	-4e-10	9.81e-08
400	1e-11	1e-09	1e-09	2e-10	8.9e-09	1.56e-08	9.05e-08	1e-09	7.185e-07	2.7e-09	9.81e-08
399	1e-11	1e-09	1e-09	1.2e-09	9.3e-09	1.59e-08	1.059e-07	1e-09	7.091e-07	5e-09	9.82e-08
398	1e-11	1e-09	1e-09	2.8e-09	9.6e-09	1.53e-08	1.239e-07	1e-09	7.217e-07	-2e-09	9.82e-08
397	1e-11	1e-09	1e-09	4.9e-09	9.9e-09	1.49e-08	1.467e-07	1e-09	7.506e-07	-8.3e-09	9.85e-08
396	1e-11	1e-09	1e-09	7.5e-09	1e-08	1.38e-08	1.745e-07	1e-09	7.478e-07	-5.9e-09	9.86e-08
395	1e-11	1e-09	1e-09	1.06e-08	1.04e-08	1.31e-08	2.082e-07	1e-09	7.872e-07	1.71e-08	9.91e-08
394	1e-11	1e-09	1e-09	1.42e-08	1.08e-08	1.28e-08	2.491e-07	1e-09	8.423e-07	3.35e-08	1.001e-07
393	1e-11	1e-09	1e-09	1.8e-08	1.13e-08	1.28e-08	2.991e-07	1e-09	8.784e-07	5.75e-08	1.013e-07
392	1e-11	1e-09	1e-09	2.19e-08	1.18e-08	1.32e-08	3.594e-07	1e-09	9.068e-07	5.96e-08	1.026e-07
391	1e-11	1e-09	1e-09	2.53e-08	1.24e-08	1.35e-08	4.327e-07	1e-09	8.916e-07	7.04e-08	1.039e-07
390	1e-11	1e-09	4e-10	2.86e-08	1.27e-08	1.34e-08	5.2e-07	1e-09	8.557e-07	7.59e-08	1.045e-07
389	1e-11	1e-09	6e-10	3.15e-08	1.3e-08	1.33e-08	6.227e-07	1e-09	8.535e-07	9.59e-08	1.054e-07
388	1e-11	1e-09	1e-09	3.42e-08	1.37e-08	1.33e-08	7.469e-07	1e-09	8.554e-07	1.105e-07	1.062e-07
387	1e-11	1e-09	1.6e-09	3.65e-08	1.42e-08	1.37e-08	8.938e-07	1e-09	8.64e-07	1.34e-07	1.066e-07
386	1e-11	1e-09	2.1e-09	3.85e-08	1.45e-08	1.41e-08	1.065e-06	1e-09	8.651e-07	1.716e-07	1.069e-07
385	1e-11	1e-09	2.8e-09	4.02e-08	1.49e-08	1.44e-08	1.264e-06	1e-09	8.527e-07	1.98e-07	1.071e-07
384	1e-11	1e-09	3.5e-09	4.18e-08	1.53e-08	1.5e-08	1.492e-06	1e-09	8.573e-07	2.15e-07	1.072e-07
383	1e-11	1e-09	4e-09	4.33e-08	1.6e-08	1.54e-08	1.756e-06	1e-09	8.526e-07	2.363e-07	1.082e-07
382	1e-11	1e-09	4.7e-09	4.52e-08	1.63e-08	1.57e-08	2.055e-06	1e-09	8.659e-07	2.469e-07	1.088e-07
381	1e-11	1e-09	5.7e-09	4.73e-08	1.69e-08	1.67e-08	2.393e-06	1e-09	9.09e-07	2.768e-07	1.094e-07
380	1e-11	1e-09	6.6e-09	4.95e-08	1.72e-08	1.67e-08	2.77e-06	1e-09	8.945e-07	3.114e-07	1.098e-07
379	1e-11	1e-09	7.2e-09	5.19e-08	1.76e-08	1.66e-08	3.188e-06	1e-09	9.125e-07	3.495e-07	1.104e-07
378	1e-11	1e-09	7.9e-09	5.43e-08	1.79e-08	1.6e-08	3.645e-06	1e-09	9.316e-07	3.528e-07	1.11e-07
377	1e-11	1e-09	8.4e-09	5.67e-08	1.82e-08	1.58e-08	4.146e-06	1e-09	9.076e-07	3.515e-07	1.117e-07
376	1e-11	1e-09	9.1e-09	5.92e-08	1.87e-08	1.57e-08	4.69e-06	1e-09	9.242e-07	3.508e-07	1.126e-07
375	1e-11	1e-09	9.9e-09	6.13e-08	1.92e-08	1.57e-08	5.269e-06	1e-09	9.008e-07	3.69e-07	1.134e-07
374	1e-11	1e-09	1.06e-08	6.35e-08	1.95e-08	1.57e-08	5.885e-06	1e-09	8.708e-07	3.705e-07	1.139e-07
373	1e-11	1e-09	1.15e-08	6.58e-08	2.01e-08	1.62e-08	6.541e-06	1e-09	8.665e-07	3.867e-07	1.142e-07
372	1e-11	1e-09	1.24e-08	6.78e-08	2.05e-08	1.62e-08	7.23e-06	1e-09	8.617e-07	4.087e-07	1.147e-07
371	1e-11	1e-09	1.31e-08	6.96e-08	2.09e-08	1.59e-08	7.954e-06	1e-09	8.373e-07	4.162e-07	1.151e-07
370	1e-11	1e-09	1.38e-08	7.13e-08	2.14e-08	1.62e-08	8.715e-06	1e-09	8.535e-07	4.4e-07	1.159e-07
369	1e-11	1e-09	1.5e-08	7.3e-08	2.22e-08	1.7e-08	9.513e-06	1e-09	8.582e-07	4.582e-07	1.164e-07
368	1e-11	1e-09	1.65e-08	7.49e-08	2.31e-08	1.87e-08	1.034e-05	1e-09	8.732e-07	4.841e-07	1.166e-07
367	1e-11	1e-09	1.8e-08	7.7e-08	2.41e-08	2.01e-08	1.121e-05	1e-09	9.03e-07	5.235e-07	1.174e-07
366	1e-11	1e-09	1.96e-08	7.97e-08	2.49e-08	2.16e-08	1.211e-05	1e-09	9.312e-07	5.662e-07	1.179e-07
365	1e-11	1e-09	2.1e-08	8.27e-08	2.59e-08	2.29e-08	1.305e-05	1e-09	9.865e-07	6.246e-07	1.183e-07
364	1e-11	1e-09	2.22e-08	8.57e-08	2.65e-08	2.31e-08	1.401e-05	1e-09	1.0156e-06	6.745e-07	1.194e-07
363	1e-11	1e-09	2.32e-08	8.92e-08	2.72e-08	2.26e-08	1.499e-05	1e-09	1.0405e-06	7.073e-07	1.205e-07
362	1e-11	1e-09	2.42e-08	9.3e-08	2.81e-08	2.2e-08	1.598e-05	1e-09	1.0735e-06	7.235e-07	1.216e-07
361	1e-11	1e-09	2.51e-08	9.73e-08	2.88e-08	2.19e-08	1.7e-05	1e-09	1.0852e-06	7.631e-07	1.228e-07
360	1e-11	1e-09	2.62e-08	1.02e-07	2.97e-08	2.19e-08	1.802e-05	1e-09	1.1284e-06	8.001e-07	1.239e-07
359	1e-11	1e-09	2.75e-08	1.067e-07	3.05e-08	2.22e-08	1.905e-05	1e-09	1.1285e-06	8.193e-07	1.251e-07
358	1e-11	1e-09	2.88e-08	1.114e-07	3.12e-08	2.23e-08	2.009e-05	1e-09	1.126e-06	8.249e-07	1.262e-07
357	1e-11	1e-09	3e-08	1.159e-07	3.2e-08	2.21e-08	2.114e-05	1e-09	1.139e-06	8.423e-07	1.272e-07
356	1e-11	1e-09	3.13e-08	1.199e-07	3.27e-08	2.15e-08	2.218e-05	1e-09	1.1437e-06	8.597e-07	1.288e-07
355	1e-11	1e-09	3.27e-08	1.237e-07	3.35e-08	2.15e-08	2.323e-05	1e-09	1.1279e-06	8.666e-07	1.299e-07
354	1e-11	1e-09	3.45e-08	1.275e-07	3.46e-08	2.26e-08	2.429e-05	1e-09	1.1723e-06	8.91e-07	1.311e-07
353	1e-11	1e-09	3.69e-08	1.311e-07	3.56e-08	2.41e-08	2.533e-05	1e-09	1.1895e-06	9.158e-07	1.32e-07
352	1e-11	1e-09	3.92e-08	1.348e-07	3.66e-08	2.57e-08	2.636e-05	1e-09	1.1804e-06	9.201e-07	1.323e-07
351	1e-11	1e-09	4.15e-08	1.384e-07	3.76e-08	2.7e-08	2.739e-05	1e-09	1.1858e-06	9.416e-07	1.331e-07
350	1e-11	1e-09	4.39e-08	1.422e-07	3.86e-08	2.8e-08	2.84e-05	1e-09	1.1786e-06	9.573e-07	1.34e-07
349	1e-11	1e-09	4.61e-08	1.46e-07	3.95e-08	2.89e-08	2.938e-05	1e-09	1.206e-06	9.81e-07	1.349e-07
348	1e-11	1e-09	4.84e-08	1.499e-07	4.07e-08	2.92e-08	3.033e-05	1e-09	1.227e-06	1.0024e-06	1.364e-07
347	1e-11	1e-09	5.07e-08	1.543e-07	4.18e-08	2.93e-08	3.123e-05	3.24e-08	1.246e-06	1.0118e-06	1.378e-07
346	1e-11	1e-09	5.31e-08	1.59e-07	4.32e-08	2.99e-08	3.211e-05	1e-09	1.2919e-06	1.0286e-06	1.39e-07
345	1e-11	1e-09	5.57e-08	1.643e-07	4.45e-08	3.05e-08	3.294e-05	8.3e-09	1.3137e-06	1.0475e-06	1.404e-07
344	1e-11	1e-09	5.86e-08	1.702e-07	4.59e-08	3.12e-08	3.376e-05	6.85e-08	1.35e-06	1.0507e-06	1.417e-07
343	1e-11	1.2e-09	6.17e-08	1.763e-07	4.73e-08	3.18e-08	3.452e-05	1.304e-07	1.3914e-06	1.0603e-06	1.433e-07
342	1e-11	2.9e-09	6.49e-08	1.826e-07	4.88e-08	3.22e-08	3.525e-05	2.504e-07	1.4281e-06	1.0668e-06	1.447e-07
341	1e-11	4.8e-09	6.82e-08	1.892e-07	5.04e-08	3.26e-08	3.594e-05	4.116e-07	1.4779e-06	1.0858e-06	1.464e-07
340	1e-11	7.1e-09	7.17e-08	1.958e-07	5.21e-08	3.3e-08	3.66e-05	5.598e-07	1.5279e-06	1.1114e-06	1.484e-07
339	1e-11	9.7e-09	7.53e-08	2.027e-07	5.39e-08	3.34e-08	3.722e-05	6.869e-07	1.5828e-06	1.134e-06	1.502e-07
338	1e-11	1.26e-08	7.92e-08	2.097e-07	5.59e-08	3.39e-08	3.778e-05	7.957e-07	1.6566e-06	1.1505e-06	1.522e-07
337	1e-11	1.61e-08	8.32e-08	2.169e-07	5.79e-08	3.42e-08	3.83e-05	1.018e-06	1.705e-06	1.1754e-06	1.543e-07
336	1e-11	1.98e-08	8.71e-08	2.243e-07	6.01e-08	3.45e-08	3.877e-05	1.265e-06	1.7254e-06	1.1871e-06	1.558e-07
335	1e-11	2.4e-08	9.13e-08	2.316e-07	6.24e-08	3.45e-08	3.919e-05	1.539e-06	1.7762e-06	1.2111e-06	1.576e-07
334	1e-11	2.87e-08	9.56e-08	2.39e-07	6.5e-08	3.44e-08	3.956e-05	1.823e-06	1.8227e-06	1.2398e-06	1.595e-07
333	1e-11	3.4e-08	1.002e-07	2.462e-07	6.8e-08	3.45e-08	3.986e-05	2.161e-06	1.888e-06	1.2933e-06	1.612e-07
332	1e-11	4.02e-08	1.049e-07	2.533e-07	7.13e-08	3.49e-08	4.01e-05	2.413e-06	1.9572e-06	1.3516e-06	1.632e-07
331	1e-11	4.73e-08	1.098e-07	2.605e-07	7.48e-08	3.51e-08	4.029e-05	2.792e-06	2.0305e-06	1.4072e-06	1.653e-07
330	1e-11	5.52e-08	1.15e-07	2.678e-07	7.88e-08	3.55e-08	4.042e-05	3.159e-06	2.1359e-06	1.4852e-06	1.673e-07
329	1e-11	6.42e-08	1.203e-07	2.753e-07	8.31e-08	3.57e-08	4.05e-05	3.603e-06	2.2354e-06	1.5802e-06	1.692e-07
328	1e-11	7.43e-08	1.259e-07	2.832e-07	8.76e-08	3.56e-08	4.055e-05	4.062e-06	2.3513e-06	1.7028e-06	1.709e-07
327	1e-11	8.57e-08	1.318e-07	2.912e-07	9.24e-08	3.58e-08	4.053e-05	4.538e-06	2.5038e-06	1.8404e-06	1.729e-07
326	1e-11	9.87e-08	1.379e-07	2.994e-07	9.72e-08	3.58e-08	4.047e-05	4.994e-06	2.684e-06	2.0158e-06	1.747e-07
325	1e-11	1.135e-07	1.444e-07	3.077e-07	1.022e-07	3.6e-08	4.036e-05	5.488e-06	2.9188e-06	2.2635e-06	1.77e-07
324	1e-11	1.309e-07	1.51e-07	3.162e-07	1.071e-07	3.63e-08	4.021e-05	5.959e-06	3.2085e-06	2.5696e-06	1.796e-07
323	1e-11	1.514e-07	1.579e-07	3.248e-07	1.119e-07	3.65e-08	4.001e-05	6.43e-06	3.5619e-06	2.9519e-06	1.818e-07
322	1e-11	1.755e-07	1.651e-07	3.338e-07	1.165e-07	3.67e-08	3.976e-05	6.95e-06	3.9807e-06	3.4488e-06	1.843e-07
321	1e-11	2.052e-07	1.725e-07	3.431e-07	1.208e-07	3.69e-08	3.946e-05	7.486e-06	4.4937e-06	4.0891e-06	1.867e-07
320	1e-11	2.412e-07	1.801e-07	3.526e-07	1.249e-07	3.72e-08	3.911e-05	7.957e-06	5.0994e-06	4.9001e-06	1.889e-07
319	1e-11	2.864e-07	1.879e-07	3.623e-07	1.289e-07	3.76e-08	3.871e-05	8.425e-06	5.8424e-06	5.9258e-06	1.913e-07
318	1e-11	3.432e-07	1.959e-07	3.72e-07	1.328e-07	3.82e-08	3.827e-05	8.935e-06	6.7244e-06	7.2238e-06	1.937e-07
317	1e-11	4.15e-07	2.042e-07	3.818e-07	1.366e-07	3.89e-08	3.777e-05	9.443e-06	7.7769e-06	8.8367e-06	1.963e-07
316	1e-11	5.073e-07	2.128e-07	3.918e-07	1.404e-07	3.98e-08	3.725e-05	9.951e-06	9.0452e-06	1.08208e-05	1.991e-07
315	1e-11	6.253e-07	2.216e-07	4.023e-07	1.442e-07	4.07e-08	3.667e-05	1.051e-05	1.05696e-05	1.32462e-05	2.019e-07
314	1e-11	7.748e-07	2.307e-07	4.13e-07	1.481e-07	4.18e-08	3.605e-05	1.101e-05	1.24071e-05	1.61839e-05	2.046e-07
313	1e-11	9.634e-07	2.4e-07	4.241e-07	1.52e-07	4.28e-08	3.541e-05	1.15e-05	1.47605e-05	1.97188e-05	2.075e-07
312	1e-11	1.1975e-06	2.496e-07	4.356e-07	1.557e-07	4.39e-08	3.475e-05	1.201e-05	1.79225e-05	2.39186e-05	2.102e-07
311	1e-11	1.4828e-06	2.592e-07	4.474e-07	1.593e-07	4.49e-08	3.405e-05	1.254e-05	2.23762e-05	2.88371e-05	2.133e-07
310	1e-11	1.8252e-06	2.691e-07	4.596e-07	1.625e-07	4.6e-08	3.332e-05	1.306e-05	2.92998e-05	3.45902e-05	2.166e-07
309	1e-11	2.2291e-06	2.792e-07	4.721e-07	1.656e-07	4.74e-08	3.258e-05	1.364e-05	4.03854e-05	4.12505e-05	2.2e-07
308	1e-11	2.6956e-06	2.894e-07	4.85e-07	1.684e-07	4.88e-08	3.183e-05	1.417e-05	5.80411e-05	4.8867e-05	2.235e-07
307	1e-11	3.2244e-06	2.997e-07	4.985e-07	1.708e-07	5e-08	3.106e-05	1.475e-05	8.50853e-05	5.74926e-05	2.268e-07
306	1e-11	3.8144e-06	3.102e-07	5.124e-07	1.731e-07	5.17e-08	3.028e-05	1.539e-05	0.000125067	6.72372e-05	2.304e-07
305	1e-11	4.4665e-06	3.207e-07	5.267e-07	1.753e-07	5.35e-08	2.95e-05	1.603e-05	0.000180546	7.81155e-05	2.341e-07
304	1e-11	5.174e-06	3.314e-07	5.415e-07	1.775e-07	5.54e-08	2.872e-05	1.674e-05	0.0002535	9.0157e-05	2.381e-07
303	1e-11	5.9414e-06	3.421e-07	5.566e-07	1.798e-07	5.74e-08	2.793e-05	1.751e-05	0.000344926	0.000103305	2.42e-07
302	1e-11	6.7726e-06	3.528e-07	5.721e-07	1.823e-07	5.94e-08	2.716e-05	1.846e-05	0.000455957	0.000117582	2.461e-07
301	1e-11	7.6775e-06	3.636e-07	5.879e-07	1.852e-07	6.13e-08	2.638e-05	1.963e-05	0.000588398	0.000132906	2.503e-07
300	1e-11	8.6637e-06	3.743e-07	6.041e-07	1.882e-07	6.33e-08	2.563e-05	2.126e-05	0.000744289	0.000149185	2.545e-07
299	1e-11	9.7466e-06	3.851e-07	6.207e-07	1.917e-07	6.55e-08	2.489e-05	2.391e-05	0.000921365	0.000166315	2.588e-07
298	1e-11	1.09452e-05	3.957e-07	6.374e-07	1.954e-07	6.76e-08	2.418e-05	2.859e-05	0.00112095	0.000184142	2.632e-07
297	1e-11	1.22717e-05	4.063e-07	6.544e-07	1.993e-07	6.97e-08	2.35e-05	3.695e-05	0.00133826	0.000202494	2.678e-07
296	1e-11	1.37497e-05	4.168e-07	6.717e-07	2.035e-07	7.2e-08	2.284e-05	5.287e-05	0.00156114	0.000221199	2.723e-07
295	1e-11	1.52464e-05	4.271e-07	6.895e-07	2.078e-07	7.42e-08	2.221e-05	8.174e-05	0.00178301	0.000240057	2.769e-07
294	1e-11	1.68166e-05	4.374e-07	7.077e-07	2.122e-07	7.67e-08	2.162e-05	0.0001315	0.00199712	0.000258851	2.816e-07
293	1e-11	1.84927e-05	4.474e-07	7.264e-07	2.169e-07	7.92e-08	2.107e-05	0.0002129	0.00219662	0.000277383	2.863e-07
292	1e-11	2.01074e-05	4.573e-07	7.456e-07	2.216e-07	8.19e-08	2.057e-05	0.0003377	0.00236436	0.000295418	2.914e-07
291	1e-11	2.16945e-05	4.669e-07	7.653e-07	2.264e-07	8.49e-08	2.011e-05	0.0005174	0.00250352	0.000312752	2.965e-07
290	1e-11	2.31056e-05	4.764e-07	7.855e-07	2.314e-07	8.81e-08	1.97e-05	0.0007587	0.00260835	0.000329234	3.018e-07
289	1e-11	2.4305e-05	4.855e-07	8.06e-07	2.363e-07	9.15e-08	1.934e-05	0.001061	0.0026808	0.000344612	3.073e-07
288	1e-11	2.53475e-05	4.944e-07	8.269e-07	2.411e-07	9.49e-08	1.902e-05	0.001416	0.00271911	0.000358734	3.13e-07
287	1e-11	2.60945e-05	5.028e-07	8.481e-07	2.456e-07	9.85e-08	1.876e-05	0.001808	0.00273605	0.000371432	3.185e-07
286	1e-11	2.66894e-05	5.109e-07	8.693e-07	2.5e-07	1.019e-07	1.856e-05	0.002215	0.00273448	0.000382609	3.242e-07
285	1e-11	2.71737e-05	5.185e-07	8.905e-07	2.542e-07	1.049e-07	1.84e-05	0.002621	0.0027206	0.000392128	3.298e-07
284	1e-11	2.72943e-05	5.257e-07	9.113e-07	2.581e-07	1.08e-07	1.831e-05	0.00301	0.00270011	0.000399902	3.352e-07
283	1e-11	2.73511e-05	5.323e-07	9.319e-07	2.62e-07	1.108e-07	1.828e-05	0.003372	0.00269013	0.000405879	3.405e-07
282	1e-11	2.70942e-05	5.386e-07	9.52e-07	2.655e-07	1.133e-07	1.83e-05	0.0037	0.00268363	0.000410019	3.459e-07
281	1e-11	2.70335e-05	5.443e-07	9.718e-07	2.685e-07	1.156e-07	1.839e-05	0.003987	0.00268399	0.000412311	3.511e-07
280	1e-11	2.69363e-05	5.495e-07	9.912e-07	2.709e-07	1.175e-07	1.855e-05	0.00423	0.00270248	0.000412822	3.562e-07
279	1e-11	2.66548e-05	5.543e-07	1.0102e-06	2.727e-07	1.192e-07	1.877e-05	0.004424	0.00273101	0.000411572	3.611e-07
278	1e-11	2.64876e-05	5.585e-07	1.0288e-06	2.738e-07	1.206e-07	1.908e-05	0.004571	0.00276078	0.000408592	3.659e-07
277	1e-11	2.61787e-05	5.622e-07	1.0473e-06	2.746e-07	1.215e-07	1.948e-05	0.004675	0.00281034	0.000404007	3.708e-07
276	1e-11	2.59066e-05	5.655e-07	1.0657e-06	2.749e-07	1.223e-07	1.996e-05	0.004741	0.00284636	0.000397879	3.758e-07
275	1e-11	2.53521e-05	5.684e-07	1.0841e-06	2.751e-07	1.23e-07	2.054e-05	0.004777	0.002899	0.000390356	3.809e-07
274	1e-11	2.48513e-05	5.71e-07	1.1025e-06	2.749e-07	1.235e-07	2.124e-05	0.004788	0.00293712	0.000381556	3.86e-07
273	1e-11	2.41625e-05	5.731e-07	1.1211e-06	2.745e-07	1.241e-07	2.206e-05	0.004774	0.00297334	0.000371594	3.912e-07
272	1e-11	2.32213e-05	5.75e-07	1.1406e-06	2.741e-07	1.246e-07	2.303e-05	0.00473	0.00300606	0.000360635	3.969e-07
271	1e-11	2.25279e-05	5.768e-07	1.1614e-06	2.739e-07	1.254e-07	2.42e-05	0.004654	0.00305755	0.000348824	4.035e-07
270	1e-11	2.16387e-05	5.786e-07	1.1844e-06	2.74e-07	1.261e-07	2.554e-05	0.004545	0.00310424	0.000336275	4.106e-07
269	1e-11	2.06921e-05	5.804e-07	1.2111e-06	2.747e-07	1.271e-07	2.727e-05	0.004408	0.00313346	0.000323154	4.189e-07
268	1e-11	1.94502e-05	5.825e-07	1.2433e-06	2.759e-07	1.285e-07	2.93e-05	0.004253	0.00315964	0.000309587	4.292e-07
267	1e-11	1.82065e-05	5.851e-07	1.2848e-06	2.776e-07	1.304e-07	3.176e-05	0.004091	0.00317717	0.00029571	4.422e-07
266	1e-11	1.71933e-05	5.888e-07	1.3402e-06	2.799e-07	1.329e-07	3.49e-05	0.003932	0.00317199	0.000281654	4.598e-07
265	1e-11	1.62959e-05	5.939e-07	1.4166e-06	2.823e-07	1.363e-07	3.801e-05	0.003781	0.00317396	0.000267544	4.833e-07
264	1e-11	1.53129e-05	6.012e-07	1.5229e-06	2.853e-07	1.406e-07	4.152e-05	0.003643	0.00317921	0.000253512	5.15e-07
263	1e-11	1.44167e-05	6.119e-07	1.6724e-06	2.89e-07	1.461e-07	4.512e-05	0.003518	0.00316573	0.000239641	5.582e-07
262	1e-11	1.37292e-05	6.277e-07	1.8829e-06	2.938e-07	1.532e-07	4.868e-05	0.003408	0.00316656	0.000226004	6.174e-07
261	1e-11	1.31311e-05	6.51e-07	2.1773e-06	3.002e-07	1.628e-07	5.188e-05	0.003318	0.00316465	0.000212712	6.983e-07
260	1e-11	1.28547e-05	6.858e-07	2.5825e-06	3.091e-07	1.757e-07	5.428e-05	0.003253	0.00313876	0.000199826	8.094e-07
259	1e-11	1.22657e-05	7.359e-07	3.1339e-06	3.213e-07	1.934e-07	5.6e-05	0.003221	0.00311743	0.000187432	9.584e-07
258	1e-11	1.19612e-05	8.071e-07	3.8754e-06	3.381e-07	2.17e-07	5.695e-05	0.003227	0.00307311	0.000175574	1.1573e-06
257	1e-11	1.15559e-05	9.079e-07	4.8571e-06	3.617e-07	2.499e-07	5.705e-05	0.003284	0.00303256	0.000164295	1.4199e-06
256	1e-11	1.12418e-05	1.0499e-06	6.1483e-06	3.952e-07	2.961e-07	5.631e-05	0.003401	0.00298426	0.000153638	1.7656e-06
255	1e-11	1.1271e-05	1.2451e-06	7.8385e-06	4.414e-07	3.594e-07	5.478e-05	0.003621	0.00293847	0.000143629	2.2119e-06
254	1e-11	1.09693e-05	1.5137e-06	1.00568e-05	5.051e-07	4.463e-07	5.259e-05	0.003962	0.00286482	0.000134306	2.7804e-06
253	1e-11	1.08223e-05	1.8884e-06	1.29854e-05	5.923e-07	5.642e-07	4.999e-05	0.004441	0.0027546	0.000125701	3.5011e-06
252	1e-11	1.0559e-05	2.4137e-06	1.6811e-05	7.12e-07	7.252e-07	4.703e-05	0.005015	0.00263322	0.00011783	4.4101e-06
251	1e-11	1.03005e-05	3.1295e-06	2.17021e-05	8.719e-07	9.4e-07	4.405e-05	0.005643	0.00249189	0.000110711	5.5455e-06
250	1e-11	1.02011e-05	4.0314e-06	2.77876e-05	1.0846e-06	1.2245e-06	4.115e-05	0.006325	0.0023399	0.000104366	6.9513e-06

## Sheet: prediction_of_k
Acid/water	Give composition wt%	MW	nmol/g	xA	nmol/dm3		Wavelength /nm	Calculated k
Oxalic acid	5	90.03	0.00055537	0.013633	0.614253		1100	1.34083e-06
Malonic acid	0	104.06	0	0	0		1099	1.30849e-06
Hydroxymalonic acid	0	120.06	0	0	0		1098	1.27955e-06
Succinic acid	0	118.09	0	0	0		1097	1.25571e-06
Glutaric acid	2	132.11	0.000151389	0.00371624	0.16744		1096	1.23368e-06
Pyruvic acid	25	88.06	0.00283897	0.0696901	3.13997		1095	1.21395e-06
Benzoic acid	0	122.12	0	0	0		1094	1.19667e-06
Phtalic acid	0	166.13	0	0	0		1093	1.18002e-06
cis-Pinonic acid	0	184.23	0	0	0		1092	1.16194e-06
Water	68	18.0148	0.0377467	0.926594	41.7488		1091	1.1434e-06
			ntot	S xA (acid)			1090	1.12961e-06
Total acid wt%	32		0.0407371	0.0870394			1089	1.11576e-06
							1088	1.10142e-06
							1087	1.08668e-06
Mole fraction organic acid	Calculated density /g cm-3			Calculated n632.8			1086	1.07219e-06
0.0870394	1.10602			1.3704			1085	1.05765e-06
							1084	1.0417e-06
Density calculated from: r = 0.99824+0.708*X^0.771							1083	1.03076e-06
Index of refraction at 632.8 nm calculated from: n = 1.3320 + 0.12*w							1082	1.01797e-06
							1081	1.00908e-06
							1080	1.00101e-06
							1079	9.91735e-07
							1078	9.86595e-07
							1077	9.80387e-07
							1076	9.74651e-07
							1075	9.71553e-07
							1074	9.68677e-07
							1073	9.65199e-07
							1072	9.63638e-07
							1071	9.62962e-07
							1070	9.62598e-07
							1069	9.63421e-07
							1068	9.63617e-07
							1067	9.65141e-07
							1066	9.65337e-07
							1065	9.69971e-07
							1064	9.74117e-07
							1063	9.76605e-07
							1062	9.84329e-07
							1061	9.90111e-07
							1060	9.96378e-07
							1059	1.00295e-06
							1058	1.00947e-06
							1057	1.01617e-06
							1056	1.02547e-06
							1055	1.03407e-06
							1054	1.04469e-06
							1053	1.05474e-06
							1052	1.0676e-06
							1051	1.07977e-06
							1050	1.09338e-06
							1049	1.10896e-06
							1048	1.12374e-06
							1047	1.13997e-06
							1046	1.15734e-06
							1045	1.17511e-06
							1044	1.19357e-06
							1043	1.21328e-06
							1042	1.23332e-06
							1041	1.25278e-06
							1040	1.27394e-06
							1039	1.29556e-06
							1038	1.31742e-06
							1037	1.33947e-06
							1036	1.36388e-06
							1035	1.38743e-06
							1034	1.41255e-06
							1033	1.43838e-06
							1032	1.46366e-06
							1031	1.49036e-06
							1030	1.5168e-06
							1029	1.54539e-06
							1028	1.57384e-06
							1027	1.60309e-06
							1026	1.63246e-06
							1025	1.6622e-06
							1024	1.69271e-06
							1023	1.72312e-06
							1022	1.75425e-06
							1021	1.78589e-06
							1020	1.81801e-06
							1019	1.84986e-06
							1018	1.88152e-06
							1017	1.91352e-06
							1016	1.94519e-06
							1015	1.97721e-06
							1014	2.00868e-06
							1013	2.04084e-06
							1012	2.07264e-06
							1011	2.10464e-06
							1010	2.13587e-06
							1009	2.167e-06
							1008	2.19814e-06
							1007	2.22847e-06
							1006	2.25909e-06
							1005	2.28906e-06
							1004	2.31935e-06
							1003	2.34861e-06
							1002	2.37756e-06
							1001	2.4061e-06
							1000	2.43458e-06
							999	2.46354e-06
							998	2.49327e-06
							997	2.52177e-06
							996	2.55053e-06
							995	2.57653e-06
							994	2.60391e-06
							993	2.62842e-06
							992	2.65478e-06
							991	2.67816e-06
							990	2.69938e-06
							989	2.72179e-06
							988	2.74149e-06
							987	2.76127e-06
							986	2.77818e-06
							985	2.79409e-06
							984	2.8075e-06
							983	2.82027e-06
							982	2.83204e-06
							981	2.84183e-06
							980	2.85012e-06
							979	2.85444e-06
							978	2.85733e-06
							977	2.85771e-06
							976	2.85726e-06
							975	2.85419e-06
							974	2.84844e-06
							973	2.84331e-06
							972	2.83494e-06
							971	2.82502e-06
							970	2.81365e-06
							969	2.7992e-06
							968	2.78399e-06
							967	2.76678e-06
							966	2.74555e-06
							965	2.72196e-06
							964	2.69357e-06
							963	2.66001e-06
							962	2.61991e-06
							961	2.57468e-06
							960	2.52706e-06
							959	2.47123e-06
							958	2.40683e-06
							957	2.33431e-06
							956	2.25468e-06
							955	2.16917e-06
							954	2.07932e-06
							953	1.98694e-06
							952	1.89405e-06
							951	1.80265e-06
							950	1.71425e-06
							949	1.62986e-06
							948	1.55099e-06
							947	1.47761e-06
							946	1.4097e-06
							945	1.34684e-06
							944	1.28873e-06
							943	1.23475e-06
							942	1.18393e-06
							941	1.13598e-06
							940	1.09048e-06
							939	1.04699e-06
							938	1.00529e-06
							937	9.6527e-07
							936	9.26778e-07
							935	8.89738e-07
							934	8.54106e-07
							933	8.19926e-07
							932	7.87391e-07
							931	7.56246e-07
							930	7.26651e-07
							929	6.98533e-07
							928	6.72165e-07
							927	6.47337e-07
							926	6.24095e-07
							925	6.02436e-07
							924	5.82426e-07
							923	5.63814e-07
							922	5.4666e-07
							921	5.30979e-07
							920	5.16605e-07
							919	5.03575e-07
							918	4.91685e-07
							917	4.80814e-07
							916	4.70965e-07
							915	4.62064e-07
							914	4.53835e-07
							913	4.46346e-07
							912	4.39545e-07
							911	4.33249e-07
							910	4.27521e-07
							909	4.22211e-07
							908	4.17268e-07
							907	4.12438e-07
							906	4.07912e-07
							905	4.03712e-07
							904	3.99646e-07
							903	3.9583e-07
							902	3.9214e-07
							901	3.88403e-07
							900	3.84846e-07
							899	3.81318e-07
							898	3.77782e-07
							897	3.74447e-07
							896	3.71173e-07
							895	3.67842e-07
							894	3.64456e-07
							893	3.61179e-07
							892	3.57902e-07
							891	3.54562e-07
							890	3.51251e-07
							889	3.47991e-07
							888	3.44626e-07
							887	3.41294e-07
							886	3.37762e-07
							885	3.34167e-07
							884	3.30607e-07
							883	3.2702e-07
							882	3.23438e-07
							881	3.19977e-07
							880	3.16416e-07
							879	3.12939e-07
							878	3.09548e-07
							877	3.06292e-07
							876	3.03132e-07
							875	3.00046e-07
							874	2.97016e-07
							873	2.94085e-07
							872	2.91142e-07
							871	2.88336e-07
							870	2.85581e-07
							869	2.83051e-07
							868	2.80634e-07
							867	2.78317e-07
							866	2.75991e-07
							865	2.73812e-07
							864	2.71729e-07
							863	2.69833e-07
							862	2.68072e-07
							861	2.66414e-07
							860	2.64573e-07
							859	2.62715e-07
							858	2.60866e-07
							857	2.5905e-07
							856	2.57213e-07
							855	2.55447e-07
							854	2.53639e-07
							853	2.51869e-07
							852	2.5007e-07
							851	2.48204e-07
							850	2.46329e-07
							849	2.44538e-07
							848	2.42801e-07
							847	2.41106e-07
							846	2.39508e-07
							845	2.37821e-07
							844	2.35922e-07
							843	2.34239e-07
							842	2.32469e-07
							841	2.30724e-07
							840	2.28845e-07
							839	2.26841e-07
							838	2.24624e-07
							837	2.22103e-07
							836	2.19151e-07
							835	2.15577e-07
							834	2.11495e-07
							833	2.06714e-07
							832	2.01358e-07
							831	1.95601e-07
							830	1.89426e-07
							829	1.83139e-07
							828	1.76897e-07
							827	1.70957e-07
							826	1.65237e-07
							825	1.60094e-07
							824	1.55551e-07
							823	1.51694e-07
							822	1.485e-07
							821	1.45812e-07
							820	1.4357e-07
							819	1.41682e-07
							818	1.40063e-07
							817	1.38581e-07
							816	1.37316e-07
							815	1.36189e-07
							814	1.35128e-07
							813	1.34143e-07
							812	1.33229e-07
							811	1.32532e-07
							810	1.31776e-07
							809	1.31342e-07
							808	1.31037e-07
							807	1.30916e-07
							806	1.30979e-07
							805	1.31158e-07
							804	1.31484e-07
							803	1.31968e-07
							802	1.32628e-07
							801	1.33191e-07
							800	1.33809e-07
							799	1.34423e-07
							798	1.35079e-07
							797	1.35701e-07
							796	1.36381e-07
							795	1.37037e-07
							794	1.37667e-07
							793	1.38452e-07
							792	1.39128e-07
							791	1.39938e-07
							790	1.40715e-07
							789	1.41512e-07
							788	1.42218e-07
							787	1.42986e-07
							786	1.43712e-07
							785	1.4423e-07
							784	1.44798e-07
							783	1.45391e-07
							782	1.45934e-07
							781	1.46439e-07
							780	1.46861e-07
							779	1.47207e-07
							778	1.47608e-07
							777	1.479e-07
							776	1.48084e-07
							775	1.48318e-07
							774	1.48431e-07
							773	1.48547e-07
							772	1.48493e-07
							771	1.48435e-07
							770	1.48281e-07
							769	1.48172e-07
							768	1.4803e-07
							767	1.47913e-07
							766	1.4775e-07
							765	1.47583e-07
							764	1.47316e-07
							763	1.47153e-07
							762	1.47016e-07
							761	1.46832e-07
							760	1.46678e-07
							759	1.4654e-07
							758	1.46298e-07
							757	1.46081e-07
							756	1.4578e-07
							755	1.45496e-07
							754	1.45191e-07
							753	1.45012e-07
							752	1.44666e-07
							751	1.44352e-07
							750	1.44031e-07
							749	1.4368e-07
							748	1.43313e-07
							747	1.43104e-07
							746	1.42733e-07
							745	1.42282e-07
							744	1.41789e-07
							743	1.41188e-07
							742	1.40395e-07
							741	1.3946e-07
							740	1.38161e-07
							739	1.36483e-07
							738	1.34375e-07
							737	1.31724e-07
							736	1.28472e-07
							735	1.24827e-07
							734	1.2069e-07
							733	1.16218e-07
							732	1.11455e-07
							731	1.06679e-07
							730	1.01778e-07
							729	9.70935e-08
							728	9.27808e-08
							727	8.88399e-08
							726	8.51409e-08
							725	8.17424e-08
							724	7.86282e-08
							723	7.58393e-08
							722	7.32511e-08
							721	7.07544e-08
							720	6.84205e-08
							719	6.60787e-08
							718	6.38325e-08
							717	6.16907e-08
							716	5.96619e-08
							715	5.77664e-08
							714	5.58003e-08
							713	5.40509e-08
							712	5.24268e-08
							711	5.08531e-08
							710	4.93291e-08
							709	4.7889e-08
							708	4.65989e-08
							707	4.53881e-08
							706	4.42736e-08
							705	4.32131e-08
							704	4.21947e-08
							703	4.12218e-08
							702	4.04076e-08
							701	3.95896e-08
							700	3.83311e-08
							699	3.81744e-08
							698	3.73978e-08
							697	3.67673e-08
							696	3.61413e-08
							695	3.55024e-08
							694	3.49182e-08
							693	3.43461e-08
							692	3.3845e-08
							691	3.33652e-08
							690	3.28849e-08
							689	3.23588e-08
							688	3.18497e-08
							687	3.13653e-08
							686	3.09397e-08
							685	3.04971e-08
							684	3.01045e-08
							683	2.96998e-08
							682	2.92947e-08
							681	2.86592e-08
							680	2.86824e-08
							679	2.826e-08
							678	2.78994e-08
							677	2.77323e-08
							676	2.7469e-08
							675	2.74051e-08
							674	2.77556e-08
							673	2.8091e-08
							672	2.82752e-08
							671	2.85712e-08
							670	2.87721e-08
							669	2.91167e-08
							668	2.95147e-08
							667	3.02416e-08
							666	2.91522e-08
							665	3.65597e-08
							664	3.46194e-08
							663	2.92041e-08
							662	2.70117e-08
							661	2.67779e-08
							660	2.65276e-08
							659	2.61685e-08
							658	2.5914e-08
							657	2.55674e-08
							656	2.51498e-08
							655	2.47033e-08
							654	2.42899e-08
							653	2.41858e-08
							652	2.41565e-08
							651	2.39601e-08
							650	2.67996e-08
							649	3.34508e-08
							648	2.76547e-08
							647	2.44111e-08
							646	2.34252e-08
							645	2.20693e-08
							644	2.13553e-08
							643	2.10967e-08
							642	2.10214e-08
							641	2.11257e-08
							640	2.10633e-08
							639	2.07626e-08
							638	2.05124e-08
							637	2.12262e-08
							636	2.34792e-08
							635	2.64147e-08
							634	2.9013e-08
							633	3.061e-08
							632	2.9879e-08
							631	2.83355e-08
							630	2.61209e-08
							629	2.35015e-08
							628	2.13175e-08
							627	2.08174e-08
							626	2.05793e-08
							625	2.03583e-08
							624	1.98113e-08
							623	1.91724e-08
							622	1.90724e-08
							621	1.97361e-08
							620	2.00328e-08
							619	1.97112e-08
							618	1.94398e-08
							617	1.94108e-08
							616	1.93606e-08
							615	1.92188e-08
							614	1.91603e-08
							613	1.92479e-08
							612	1.94568e-08
							611	1.95319e-08
							610	1.96824e-08
							609	1.99412e-08
							608	2.01623e-08
							607	2.01208e-08
							606	2.04213e-08
							605	2.05924e-08
							604	2.05801e-08
							603	2.03587e-08
							602	2.00542e-08
							601	1.95197e-08
							600	1.89226e-08
							599	1.83175e-08
							598	1.78414e-08
							597	1.73782e-08
							596	1.66726e-08
							595	1.58417e-08
							594	1.55163e-08
							593	1.51905e-08
							592	1.52075e-08
							591	1.53368e-08
							590	1.53868e-08
							589	1.53912e-08
							588	1.5604e-08
							587	1.59299e-08
							586	1.6197e-08
							585	1.63681e-08
							584	1.68693e-08
							583	1.7295e-08
							582	1.73954e-08
							581	1.73786e-08
							580	1.71615e-08
							579	1.69028e-08
							578	1.70113e-08
							577	1.68818e-08
							576	1.69697e-08
							575	1.66982e-08
							574	1.60346e-08
							573	1.56964e-08
							572	1.53247e-08
							571	1.4849e-08
							570	1.42895e-08
							569	1.37261e-08
							568	1.32333e-08
							567	1.27364e-08
							566	1.22106e-08
							565	1.1864e-08
							564	1.1501e-08
							563	1.1192e-08
							562	1.10875e-08
							561	1.06107e-08
							560	1.05634e-08
							559	1.02416e-08
							558	1.00047e-08
							557	1.00148e-08
							556	9.96251e-09
							555	9.7018e-09
							554	9.64117e-09
							553	9.38939e-09
							552	8.86805e-09
							551	9.13006e-09
							550	8.87112e-09
							549	8.55374e-09
							548	8.27842e-09
							547	7.98191e-09
							546	7.66066e-09
							545	7.36416e-09
							544	7.0259e-09
							543	6.68378e-09
							542	6.33717e-09
							541	6.10777e-09
							540	5.91981e-09
							539	5.7235e-09
							538	5.57342e-09
							537	5.43973e-09
							536	5.36063e-09
							535	5.28122e-09
							534	5.27695e-09
							533	4.76787e-09
							532	4.95205e-09
							531	5.28623e-09
							530	5.27241e-09
							529	5.51145e-09
							528	5.72038e-09
							527	5.64572e-09
							526	5.4718e-09
							525	4.97373e-09
							524	4.75774e-09
							523	4.68579e-09
							522	4.05652e-09
							521	4.04569e-09
							520	3.41793e-09
							519	3.28424e-09
							518	3.01371e-09
							517	2.85857e-09
							516	3.5282e-09
							515	3.63697e-09
							514	3.79552e-09
							513	3.92934e-09
							512	4.05449e-09
							511	4.22557e-09
							510	4.43453e-09
							509	4.54716e-09
							508	4.66011e-09
							507	4.76856e-09
							506	4.76847e-09
							505	4.76869e-09
							504	4.76024e-09
							503	4.71454e-09
							502	4.71862e-09
							501	4.72271e-09
							500	4.7271e-09
							499	4.73118e-09
							498	4.73558e-09
							497	4.73966e-09
							496	4.74374e-09
							495	4.74814e-09
							494	4.75222e-09
							493	4.7563e-09
							492	4.7607e-09
							491	4.76478e-09
							490	4.76918e-09
							489	4.77326e-09
							488	4.77734e-09
							487	4.78174e-09
							486	4.78582e-09
							485	4.79022e-09
							484	4.7943e-09
							483	4.79838e-09
							482	4.80278e-09
							481	4.80686e-09
							480	4.81125e-09
							479	4.81534e-09
							478	4.81942e-09
							477	4.82381e-09
							476	4.8279e-09
							475	4.83229e-09
							474	4.83637e-09
							473	4.84046e-09
							472	4.84485e-09
							471	4.84893e-09
							470	4.85333e-09
							469	4.85741e-09
							468	4.86149e-09
							467	4.86589e-09
							466	4.86997e-09
							465	4.87405e-09
							464	4.87845e-09
							463	4.88253e-09
							462	4.88693e-09
							461	4.89101e-09
							460	4.89509e-09
							459	4.89949e-09
							458	4.90357e-09
							457	4.90796e-09
							456	4.91205e-09
							455	4.91613e-09
							454	4.92052e-09
							453	4.92461e-09
							452	4.929e-09
							451	4.93308e-09
							450	4.93717e-09
							449	4.94156e-09
							448	4.94564e-09
							447	4.95004e-09
							446	4.95412e-09
							445	4.9582e-09
							444	4.9626e-09
							443	4.96668e-09
							442	4.97108e-09
							441	4.97516e-09
							440	4.97924e-09
							439	4.98364e-09
							438	4.98772e-09
							437	4.9918e-09
							436	4.9962e-09
							435	5.00028e-09
							434	5.00468e-09
							433	5.00876e-09
							432	5.01284e-09
							431	5.01724e-09
							430	5.02132e-09
							429	5.02571e-09
							428	5.0298e-09
							427	-1.56415e-09
							426	1.57583e-09
							425	2.51782e-09
							424	4.7158e-09
							423	8.79776e-09
							422	1.47637e-08
							421	1.57057e-08
							420	1.88457e-08
							419	2.54396e-08
							418	3.07776e-08
							417	3.61155e-08
							416	4.17675e-08
							415	4.80474e-08
							414	5.55834e-08
							413	6.15493e-08
							412	6.80595e-08
							411	7.58425e-08
							410	8.49317e-08
							409	9.4452e-08
							408	1.04039e-07
							407	1.17164e-07
							406	1.33429e-07
							405	1.49364e-07
							404	1.67743e-07
							403	1.90502e-07
							402	2.1792e-07
							401	2.50379e-07
							400	2.87811e-07
							399	3.36217e-07
							398	3.92636e-07
							397	4.64161e-07
							396	5.51268e-07
							395	6.56968e-07
							394	7.85342e-07
							393	9.42341e-07
							392	1.13175e-06
							391	1.36196e-06
							390	1.63606e-06
							389	1.95852e-06
							388	2.3485e-06
							387	2.80983e-06
							386	3.34746e-06
							385	3.97237e-06
							384	4.68838e-06
							383	5.5174e-06
							382	6.4563e-06
							381	7.51778e-06
							380	8.70155e-06
							379	1.0014e-05
							378	1.14489e-05
							377	1.3022e-05
							376	1.47301e-05
							375	1.65482e-05
							374	1.84824e-05
							373	2.05423e-05
							372	2.27057e-05
							371	2.4979e-05
							370	2.73686e-05
							369	2.98744e-05
							368	3.24715e-05
							367	3.52035e-05
							366	3.80297e-05
							365	4.09815e-05
							364	4.39959e-05
							363	4.7073e-05
							362	5.01815e-05
							361	5.33842e-05
							360	5.6587e-05
							359	5.98212e-05
							358	6.30868e-05
							357	6.63838e-05
							356	6.96492e-05
							355	7.29462e-05
							354	7.62748e-05
							353	7.95406e-05
							352	8.2775e-05
							351	8.60094e-05
							350	8.91809e-05
							349	9.22583e-05
							348	9.52413e-05
							347	9.80673e-05
							346	0.000100831
							345	0.000103437
							344	0.000106012
							343	0.000108398
							342	0.000110692
							341	0.000112859
							340	0.000114933
							339	0.000116882
							338	0.000118642
							337	0.000120277
							336	0.000121755
							335	0.000123076
							334	0.000124241
							333	0.000125186
							332	0.000125944
							331	0.000126545
							330	0.000126958
							329	0.000127215
							328	0.000127378
							327	0.000127322
							326	0.000127142
							325	0.000126805
							324	0.000126345
							323	0.00012573
							322	0.00012496
							321	0.000124036
							320	0.000122959
							319	0.000121731
							318	0.000120384
							317	0.000118859
							316	0.000117283
							315	0.000115534
							314	0.000113679
							313	0.000111786
							312	0.000109857
							311	0.000107835
							310	0.000105753
							309	0.000103678
							308	0.00010161
							307	9.95169e-05
							306	9.74305e-05
							305	9.53821e-05
							304	9.33679e-05
							303	9.1359e-05
							302	8.94521e-05
							301	8.75591e-05
							300	8.58102e-05
							299	8.41522e-05
							298	8.26594e-05
							297	8.13394e-05
							296	8.01752e-05
							295	7.91168e-05
							294	7.82291e-05
							293	7.75321e-05
							292	7.69544e-05
							291	7.64854e-05
							290	7.60653e-05
							289	7.56722e-05
							288	7.53084e-05
							287	7.49514e-05
							286	7.46894e-05
							285	7.4485e-05
							284	7.4277e-05
							283	7.42182e-05
							282	7.41236e-05
							281	7.43693e-05
							280	7.48123e-05
							279	7.53305e-05
							278	7.62014e-05
							277	7.72678e-05
							276	7.8608e-05
							275	8.00887e-05
							274	8.19791e-05
							273	8.41309e-05
							272	8.65986e-05
							271	8.98466e-05
							270	9.35081e-05
							269	9.83589e-05
							268	0.00010397
							267	0.000110931
							266	0.000120169
							265	0.000129383
							264	0.000139802
							263	0.000150556
							262	0.000161313
							261	0.000170995
							260	0.000178364
							259	0.000183406
							258	0.000186205
							257	0.000186276
							256	0.000183767
							255	0.000178992
							254	0.000171944
							253	0.00016371
							252	0.000154281
							251	0.000144801
							250	0.000135681
